# Supplementary material for: Global Landscape of a Co-Expressed Gene Network in Barley and its Application to Gene Discovery in Triticeae Crops
Source: PubMed Central journal article supplement — Plant Cell Physiol. 2011 Mar 24;52(5):785–803. doi: 10.1093/pcp/pcr035 (PMC3093127; doi:10.1093/pcp/pcr035), 2011-03-24
Supplement: supp_pcr035_pcp-2011-e-00060-File004.pdf [file supp_pcr035_pcp-2011-e-00060-File004.pdf]

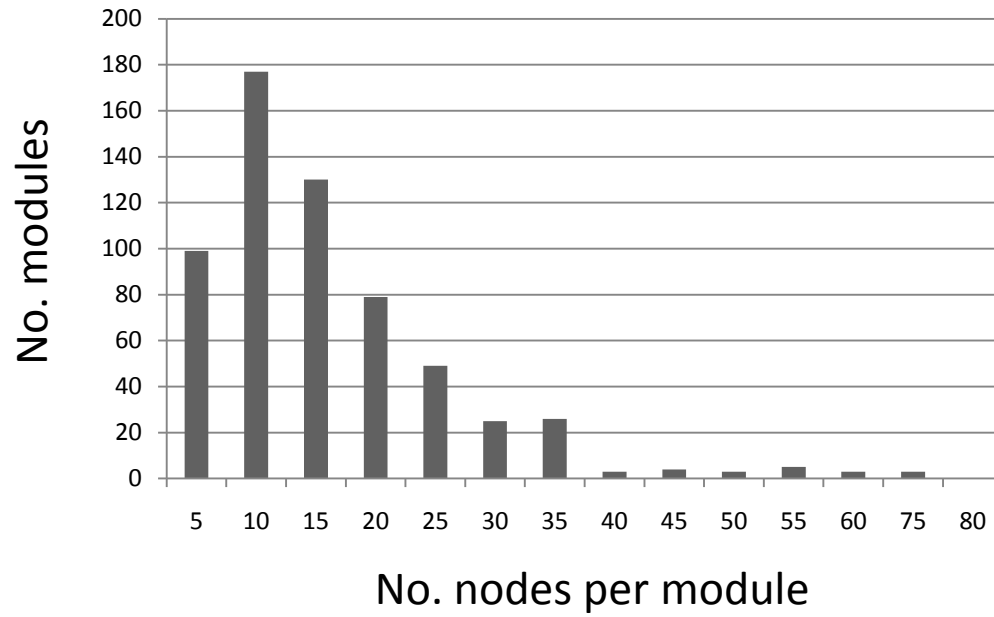

Figure S1. Distribution of number of probes per module.

# Co-expressed gene network in barley

Keyword search > *Hordeum vulgare* > Contig10934\_at

## Summary

|                        |                                                                                                                                                                                                                                                                                                                                                                                                                                                                                                                                                                                                                                                                       |
|------------------------|-----------------------------------------------------------------------------------------------------------------------------------------------------------------------------------------------------------------------------------------------------------------------------------------------------------------------------------------------------------------------------------------------------------------------------------------------------------------------------------------------------------------------------------------------------------------------------------------------------------------------------------------------------------------------|
| Probe ID               | Contig10934_at                                                                                                                                                                                                                                                                                                                                                                                                                                                                                                                                                                                                                                                        |
| Link to Genevestigator | Link <a href="#">↗</a>                                                                                                                                                                                                                                                                                                                                                                                                                                                                                                                                                                                                                                                |
| Affymetrix annotations | <ul style="list-style-type: none"> <li>Probe Set ID: Contig10934_at</li> <li>GeneChip Array: Affymetrix Barley Genome Array</li> <li>Species Scientific Name: <i>Hordeum vulgare</i></li> <li>Annotation Date: 10-Aug-10</li> <li>Sequence Type: Exemplar sequence</li> <li>Sequence Source: Affymetrix Proprietary Database</li> <li>Transcript ID: Contig10934</li> <li>Target Description: BEST BLASTX NR: 11/08/02 AA006848.1 2e-16 (AC099401) Putative abscisic acid-induced protein [Oryza sativa (japonica cultivar-group)]</li> <li>Representative Public ID: Contig10934</li> <li>Archival UniGene Cluster: ---</li> <li><a href="#">more ...</a></li> </ul> |

## BLAST results

| vs DB                         | Program | Description                                                                                                                   | Score | E value |
|-------------------------------|---------|-------------------------------------------------------------------------------------------------------------------------------|-------|---------|
| TAIR <a href="#">↗</a>        | blastx  | AT3G22490.1   Symbols:   late embryogenesis abundant protein, putative / LEA protein, putative   chr3:7969785-7970738 REVERSE | 82    | 2e-16   |
| Bdi <a href="#">↗</a>         | blastx  | Bradi4g07340.1                                                                                                                | 133   | 5e-32   |
| RAP <a href="#">↗</a>         | blastx  | Os06g0341300 AK107654                                                                                                         | 135   | 1e-32   |
| TIGR GI Hwu <a href="#">↗</a> | blastn  | TC223621                                                                                                                      | 827   | 0.0     |
| TIGR GI Tae <a href="#">↗</a> | blastn  | TC416163                                                                                                                      | 549   | 2e-155  |

## Gene Ontology

- Biological Process
  - GO 0009793 [↗](#)
- Cellular Component
  - GO 0005575 [↗](#)
- Molecular Function
  - GO 0003674 [↗](#)

## Co-expressed genes

Top 10   Top 50   Top 100   Download

| Ilum. | Probe name      | MR  | wPCC  | Target Description                                                                                                                                                        |
|-------|-----------------|-----|-------|---------------------------------------------------------------------------------------------------------------------------------------------------------------------------|
| 1.    | Contig6087_s_at | 1.7 | 0.945 | BEST BLASTX NR: 10/02/02 NP_196350.1 1e-21 putative protein; protein id: AT5g07330.1 [Arabidopsis thaliana] prtT49872 hypothetical protein T201.40 - Arabidopsis thaliana |
| 2.    | Contig3690_s_at | 2   | 0.938 | BEST BLASTX NR: 01/29/03 AAF29532.1 5e-36 plasma membrane associated protein [Hordeum vulgare]                                                                            |
| 3.    | Contig1713_s_at | 4.9 | 0.902 | BEST BLASTX NR: 10/13/02 AAF01692.1 2e-05 (AF181454) dehydrin, DHV4 [Hordeum vulgare] [Hordeum vulgare subsp. vulgare]                                                    |
| 4.    | Contig2406_at   | 5.2 | 0.923 | BEST BLASTX NR: 11/04/02 000747 7e-07 PROTEIN LE25 pit519253 gene le25 protein - tomato                                                                                   |
| 5.    | Contig2406_at   | 5.5 | 0.905 | BEST BLASTX NR: 10/26/02 T04147 2e-33 LEA protein - rice gb AAC03364.1  LEA-like protein [Oryza sativa]                                                                   |
| 6.    | Contig7112_at   | 6.5 | 0.903 | BEST BLASTX NR: 10/27/02 NP_201479.1 9e-19 putative protein; protein id: A15g68780.1, supported by cDNA: gi_15081693, supported by cDNA: gi_16252266 [Arabidopsis]        |
| 7.    | Contig4760_s_at | 6.6 | 0.869 | BEST BLASTX NR: 11/08/02 BAB32715.1 1e-67 putative late embryogenesis abundant protein LEA14-A [Oryza sativa (japonica cultivar-group)]                                   |
| 8.    | Contig8824_at   | 6.7 | 0.905 | BEST BLASTX NR: 11/04/02 NP_194911.1 4e-18 (NM_119333) putative protein; protein id: A14q31830.1 [Arabidopsis thaliana]                                                   |
| 9.    | Contig9191_at   | 7   | 0.82  | BEST BLASTX NR: 11/04/02 BAA82377.1 1e-66 ESTs AU070372 S13446 AU075541 S03553 correspond to a region of the predicted gene - Similar to Arabidopsis thaliana BAC         |
| 10.   | HV14105u_x_at   | 7.2 | 0.908 | BEST BLASTX NR:                                                                                                                                                           |

Home   Keyword search   Download   Quick search

Keyword search

**Description of each search function**

- ✓ **Keyword...** search for genes using keywords found in all data associated with each barley gene.
- ✓ **Probe IDs...** search for genes using any probe IDs.
- ✓ **GO Terms...** search for genes using GO terms associated with each term.

Keyword   Probe IDs   GO Terms

Search by Probe IDs

Contig10934\_at

Search   Clear

e.g., "Contig37"

Disclaimer | Contact us  
© 2011 RIKEN, All rights reserved.

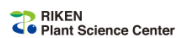

A

Keyword search

Barley

1 result for Contig10934\_at

- Contig10934\_at
  - TAIR9 (E value: 2e-16 Score: 82) AT3G22490.1 | Symbols: | late embryogenesis abundant protein, putative / LEA protein, putative | chr3:7969785-7970738 REVERSE
  - Bdi1 (E value: 5e-32 Score: 133) Bradi4g07340.1
  - RAP2 (E value: 1e-32 Score: 135) Os06g0341300|AK107654
  - HVGI (E value: 0.0 Score: 827) TC223621
  - TAGI (E value: 2e-155 Score: 549) TC416163

B

Download

Co-expressed gene dataset   [HeMo analysis result](#)   [GO Slim annotation of each module](#)

Co-expressed gene dataset

The tar.gz file includes dataset of weighted Pearson's correlation coefficient (PCC) values for all pair-wise combinations of the available probes as tab-delimited text files. Each tab-delimited file consists of probe id, mutual rank and weighted pcc values.

Download (4.0 GB)

D

C

Figure S2. The interface of the web site used to provide datasets of the co-expression network of barley genes (<http://coexpression.psc.riken.jp/barley/>). (A) The interface provides search queries for the keywords, probe identifiers, and GO terms associated with the probes. (B) The search results are listed with annotations based on similarity searches. Users can navigate to the detailed annotation pages to browse the related annotations. (C) The detailed annotation pages provide summarized basic information on each of the probes, hyperlinks to Genevestigator, GO annotation, and ranked probes that are co-expressed. (D) The web site also provides a user interface for downloading archived datasets of the co-expressed genes in barley.
