# Supplementary material for: Global Landscape of a Co-Expressed Gene Network in Barley and its Application to Gene Discovery in Triticeae Crops
Source: PubMed Central journal article supplement — Plant Cell Physiol. 2011 Mar 24;52(5):785–803. doi: 10.1093/pcp/pcr035 (PMC3093127; doi:10.1093/pcp/pcr035), 2011-03-24
Supplement: supp_pcr035_pcp-2011-e-00060-File005.pdf [file supp_pcr035_pcp-2011-e-00060-File005.pdf]

Table S1. GO Terms in biological process significantly enriched in each module found by TopGO analysis according to different tests.

The column Annotated and Expected represent number of annotated genes and those of significant genes.

The column Expected represents the expected number of interesting genes mapped to the GO term if the interesting genes were randomly distributed over all GO terms (Alexa et al. 2006).

The columns, "classicFisher", "classicKS", "elimKS" and "wight" represent the p-values on the GO terms returned by each test statistics used in the TopGO package.

| Module ID  | P_value(classicFisher) <1e-5 | GOID       | GO Term                                     | Annotate<br>d | Significan<br>t | Expected | Rank in<br>classic | classicFisher | classicKS | elimKS   | weight   |
|------------|------------------------------|------------|---------------------------------------------|---------------|-----------------|----------|--------------------|---------------|-----------|----------|----------|
| module_113 | 6.00E-06                     | GO:0006413 | translational initiation                    | 44            | 3               | 0.04     | 1                  | 6.00E-06      | 0.007     | 0.00033  | 6.00E-06 |
| module_118 | 5.70E-08                     | GO:0042550 | photosystem I stabilization                 | 3             | 2               | 0        | 1                  | 5.70E-08      | 1         | 5.70E-08 | 5.70E-08 |
| module_118 | 1.10E-07                     | GO:0019375 | galactolipid biosynthetic process           | 4             | 2               | 0        | 2                  | 1.10E-07      | 1         | 1.10E-07 | 1.10E-07 |
| module_118 | 7.70E-06                     | GO:0006643 | membrane lipid metabolic process            | 29            | 2               | 0.01     | 10                 | 7.70E-06      | 0.77504   | 1        | 1        |
| module_118 | 1.00E-06                     | GO:0006664 | glycolipid metabolic process                | 11            | 2               | 0        | 5                  | 1.00E-06      | 1         | 1        | 1        |
| module_118 | 6.80E-07                     | GO:0009247 | glycolipid biosynthetic process             | 9             | 2               | 0        | 4                  | 6.80E-07      | 0.92575   | 1        | 1        |
| module_118 | 2.60E-06                     | GO:0010109 | regulation of photosynthesis                | 17            | 2               | 0        | 8                  | 2.60E-06      | 0.99932   | 1        | 1        |
| module_118 | 1.10E-07                     | GO:0019374 | galactolipid metabolic process              | 4             | 2               | 0        | 3                  | 1.10E-07      | 1         | 1        | 1        |
| module_118 | 1.30E-06                     | GO:0042548 | regulation of photosynthesis, light reac... | 12            | 2               | 0        | 6                  | 1.30E-06      | 1         | 1        | 1        |
| module_118 | 1.30E-06                     | GO:0043467 | regulation of generation of precursor me... | 12            | 2               | 0        | 7                  | 1.30E-06      | 1         | 1        | 1        |
| module_118 | 2.60E-06                     | GO:0046467 | membrane lipid biosynthetic process         | 17            | 2               | 0        | 9                  | 2.60E-06      | 0.94877   | 1        | 1        |
| module_12  | 1.10E-07                     | GO:0006556 | S-adenosylmethionine biosynthetic proces... | 4             | 2               | 0        | 1                  | 1.10E-07      | 0.28511   | 1.10E-07 | 1.10E-07 |
| module_12  | 9.40E-06                     | GO:0000097 | sulfur amino acid biosynthetic process      | 32            | 2               | 0.01     | 6                  | 9.40E-06      | 0.86312   | 1        | 1        |
| module_12  | 7.20E-06                     | GO:0009119 | ribonucleoside metabolic process            | 28            | 2               | 0.01     | 5                  | 7.20E-06      | 0.18336   | 1        | 1        |
| module_12  | 4.00E-06                     | GO:0042278 | purine nucleoside metabolic process         | 21            | 2               | 0        | 3                  | 4.00E-06      | 0.06187   | 1        | 1        |
| module_12  | 4.00E-06                     | GO:0046128 | purine ribonucleoside metabolic process     | 21            | 2               | 0        | 4                  | 4.00E-06      | 0.06187   | 1        | 1        |
| module_12  | 1.90E-07                     | GO:0046500 | S-adenosylmethionine metabolic process      | 5             | 2               | 0        | 2                  | 1.90E-07      | 0.41626   | 1        | 1        |
| module_125 | 4.20E-10                     | GO:0009853 | photorespiration                            | 26            | 5               | 0.04     | 1                  | 4.20E-10      | 1         | 4.20E-10 | 4.20E-10 |
| module_125 | 6.80E-09                     | GO:0043094 | cellular metabolic compound salvage         | 44            | 5               | 0.07     | 2                  | 6.80E-09      | 0.96117   | 1        | 1        |
| module_128 | 5.40E-07                     | GO:0006878 | cellular copper ion homeostasis             | 10            | 3               | 0.02     | 1                  | 5.40E-07      | 0.88344   | 5.40E-07 | 5.40E-07 |
| module_128 | 5.90E-06                     | GO:0030005 | cellular di-, tri-valent inorganic catio... | 21            | 3               | 0.04     | 3                  | 5.90E-06      | 0.45763   | 1        | 1        |
| module_128 | 7.40E-07                     | GO:0055070 | copper ion homeostasis                      | 11            | 3               | 0.02     | 2                  | 7.40E-07      | 0.96133   | 1        | 1        |
| module_141 | 7.30E-06                     | GO:0006468 | protein amino acid phosphorylation          | 609           | 6               | 0.59     | 1                  | 7.30E-06      | 0.47199   | 7.30E-06 | 7.30E-06 |
| module_142 | 1.10E-10                     | GO:0006656 | phosphatidylcholine biosynthetic process    | 6             | 3               | 0        | 1                  | 1.10E-10      | 0.74643   | 1.10E-10 | 1.10E-10 |
| module_142 | 2.10E-07                     | GO:0006576 | cellular biogenic amine metabolic proces... | 62            | 3               | 0.02     | 9                  | 2.10E-07      | 0.64382   | 1        | 1        |
| module_142 | 3.30E-07                     | GO:0006644 | phospholipid metabolic process              | 72            | 3               | 0.02     | 10                 | 3.30E-07      | 0.27062   | 1        | 1        |
| module_142 | 4.00E-08                     | GO:0006650 | glycerophospholipid metabolic process       | 36            | 3               | 0.01     | 6                  | 4.00E-08      | 0.62325   | 1        | 1        |
| module_142 | 7.90E-08                     | GO:0008654 | phospholipid biosynthetic process           | 45            | 3               | 0.01     | 8                  | 7.90E-08      | 0.22598   | 1        | 1        |
| module_142 | 4.90E-07                     | GO:0019637 | organophosphate metabolic process           | 82            | 3               | 0.02     | 11                 | 4.90E-07      | 0.13516   | 1        | 1        |
| module_142 | 2.50E-09                     | GO:0042439 | ethanolamine and derivative metabolic pr... | 15            | 3               | 0        | 3                  | 2.50E-09      | 0.78653   | 1        | 1        |
| module_142 | 7.40E-09                     | GO:0045017 | glycerolipid biosynthetic process           | 21            | 3               | 0.01     | 5                  | 7.40E-09      | 0.63406   | 1        | 1        |
| module_142 | 9.20E-10                     | GO:0046470 | phosphatidylcholine metabolic process       | 11            | 3               | 0        | 2                  | 9.20E-10      | 0.46535   | 1        | 1        |
| module_142 | 2.50E-09                     | GO:0046474 | glycerophospholipid biosynthetic process    | 15            | 3               | 0        | 4                  | 2.50E-09      | 0.90877   | 1        | 1        |
| module_142 | 6.80E-08                     | GO:0046486 | glycerolipid metabolic process              | 43            | 3               | 0.01     | 7                  | 6.80E-08      | 0.31831   | 1        | 1        |
| module_167 | 6.50E-14                     | GO:0006334 | nucleosome assembly                         | 81            | 8               | 0.12     | 1                  | 6.50E-14      | 0.24956   | 6.50E-14 | 6.50E-14 |
| module_167 | 7.90E-14                     | GO:0006323 | DNA packaging                               | 83            | 8               | 0.12     | 4                  | 7.90E-14      | 0.22698   | 1        | 1        |
| module_167 | 9.60E-12                     | GO:0006325 | chromatin organization                      | 149           | 8               | 0.22     | 8                  | 9.60E-12      | 0.28623   | 1        | 1        |
| module_167 | 5.10E-13                     | GO:0006333 | chromatin assembly or disassembly           | 104           | 8               | 0.15     | 7                  | 5.10E-13      | 0.098     | 1        | 1        |
| module_167 | 4.30E-08                     | GO:0006996 | organelle organization                      | 428           | 8               | 0.63     | 15                 | 4.30E-08      | 0.20531   | 1        | 1        |
| module_167 | 2.20E-07                     | GO:0016043 | cellular component organization             | 762           | 9               | 1.11     | 17                 | 2.20E-07      | 0.14767   | 0.384    | 1        |
| module_167 | 2.60E-09                     | GO:0022607 | cellular component assembly                 | 300           | 8               | 0.44     | 14                 | 2.60E-09      | 0.17592   | 1        | 1        |
| module_167 | 7.20E-14                     | GO:0031497 | chromatin assembly                          | 82            | 8               | 0.12     | 3                  | 7.20E-14      | 0.28547   | 1        | 1        |
| module_167 | 1.40E-10                     | GO:0034621 | cellular macromolecular complex subunit ... | 207           | 8               | 0.3      | 11                 | 1.40E-10      | 0.41022   | 1        | 1        |
| module_167 | 7.80E-11                     | GO:0034622 | cellular macromolecular complex assembly    | 193           | 8               | 0.28     | 10                 | 7.80E-11      | 0.25527   | 1        | 1        |
| module_167 | 6.50E-14                     | GO:0034728 | nucleosome organization                     | 81            | 8               | 0.12     | 2                  | 6.50E-14      | 0.24956   | 1        | 1        |
| module_167 | 1.90E-09                     | GO:0043933 | macromolecular complex subunit organizat... | 289           | 8               | 0.42     | 13                 | 1.90E-09      | 0.27      | 1        | 1        |
| module_167 | 1.30E-07                     | GO:0044085 | cellular component biogenesis               | 496           | 8               | 0.72     | 16                 | 1.30E-07      | 0.46086   | 1        | 1        |
| module_167 | 2.70E-11                     | GO:0051276 | chromosome organization                     | 169           | 8               | 0.25     | 9                  | 2.70E-11      | 0.30852   | 1        | 1        |
| module_167 | 1.30E-09                     | GO:0065003 | macromolecular complex assembly             | 275           | 8               | 0.4      | 12                 | 1.30E-09      | 0.15484   | 1        | 1        |
| module_167 | 7.90E-14                     | GO:0065004 | protein-DNA complex assembly                | 83            | 8               | 0.12     | 5                  | 7.90E-14      | 0.32381   | 1        | 1        |
| module_167 | 3.70E-13                     | GO:0071103 | DNA conformation change                     | 100           | 8               | 0.15     | 6                  | 3.70E-13      | 0.17799   | 1        | 1        |
| module_168 | 9.60E-06                     | GO:0007049 | cell cycle                                  | 105           | 4               | 0.14     | 1                  | 9.60E-06      | 0.69464   | 0.09637  | 1        |
| module_170 | 1.50E-08                     | GO:0019253 | reductive pentose-phosphate cycle           | 7             | 4               | 0.03     | 1                  | 1.50E-08      | 0.95879   | 1.50E-08 | 1.50E-08 |
| module_170 | 1.30E-06                     | GO:0015979 | photosynthesis                              | 175           | 8               | 0.82     | 5                  | 1.30E-06      | 0.63278   | 0.00566  | 0.09569  |
| module_170 | 9.60E-07                     | GO:0015977 | carbon fixation                             | 17            | 4               | 0.08     | 3                  | 9.60E-07      | 0.99999   | 1        | 1        |
| module_170 | 5.20E-08                     | GO:0019685 | photosynthesis, dark reaction               | 9             | 4               | 0.04     | 2                  | 5.20E-08      | 0.99046   | 1        | 1        |
| module_170 | 9.60E-07                     | GO:0071704 | organic substance metabolic process         | 17            | 4               | 0.08     | 4                  | 9.60E-07      | 0.99999   | 1        | 1        |
| module_180 | 1.00E-07                     | GO:0006084 | acetyl-CoA metabolic process                | 32            | 4               | 0.05     | 1                  | 1.00E-07      | 0.83085   | 1        | 1        |
| module_180 | 6.70E-06                     | GO:0015980 | energy derivation by oxidation of organi... | 89            | 4               | 0.13     | 3                  | 6.70E-06      | 0.7401    | 0.07032  | 1        |
| module_180 | 2.10E-06                     | GO:0045333 | cellular respiration                        | 67            | 4               | 0.1      | 2                  | 2.10E-06      | 0.8114    | 0.04591  | 1        |
| module_202 | 3.40E-07                     | GO:0033014 | tetrapyrrole biosynthetic process           | 46            | 4               | 0.06     | 1                  | 3.40E-07      | 0.16705   | 0.00029  | 3.40E-07 |
| module_202 | 8.80E-07                     | GO:0033013 | tetrapyrrole metabolic process              | 58            | 4               | 0.08     | 2                  | 8.80E-07      | 0.55222   | 1        | 1        |
| module_222 | 5.10E-09                     | GO:0006364 | rRNA processing                             | 35            | 5               | 0.07     | 2                  | 5.10E-09      | 0.99999   | 2.20E-07 | 2.20E-07 |
| module_222 | 1.60E-09                     | GO:0006396 | RNA processing                              | 197           | 8               | 0.38     | 1                  | 1.60E-09      | 0.99261   | 1        | 1        |
| module_222 | 5.10E-09                     | GO:0016072 | rRNA metabolic process                      | 35            | 5               | 0.07     | 3                  | 5.10E-09      | 0.99999   | 1        | 1        |
| module_222 | 9.50E-06                     | GO:0022613 | ribonucleoprotein complex biogenesis        | 155           | 5               | 0.3      | 7                  | 9.50E-06      | 0.99995   | 1        | 1        |
| module_222 | 2.10E-07                     | GO:0034470 | ncRNA processing                            | 72            | 5               | 0.14     | 4                  | 2.10E-07      | 0.96828   | 1        | 1        |
| module_222 | 5.60E-06                     | GO:0034660 | ncRNA metabolic process                     | 139           | 5               | 0.27     | 5                  | 5.60E-06      | 0.8343    | 1        | 1        |
| module_222 | 9.20E-06                     | GO:0042254 | ribosome biogenesis                         | 154           | 5               | 0.3      | 6                  | 9.20E-06      | 0.99995   | 1        | 1        |
| module_236 | 3.20E-06                     | GO:0009411 | response to UV                              | 69            | 4               | 0.11     | 9                  | 3.20E-06      | 0.99662   | 0.02764  | 3.20E-06 |
| module_236 | 1.50E-09                     | GO:0009698 | phenylpropanoid metabolic process           | 153           | 7               | 0.24     | 1                  | 1.50E-09      | 0.97213   | 0.00385  | 4.70E-06 |
| module_236 | 8.70E-06                     | GO:0006519 | cellular amino acid and derivative metab... | 546           | 7               | 0.85     | 11                 | 8.70E-06      | 0.77454   | 1        | 1        |
| module_236 | 5.10E-08                     | GO:0006575 | cellular amino acid derivative metabolic... | 255           | 7               | 0.4      | 4                  | 5.10E-08      | 0.61246   | 1        | 1        |
| module_236 | 3.50E-09                     | GO:0006725 | cellular aromatic compound metabolic pro... | 286           | 8               | 0.45     | 2                  | 3.50E-09      | 0.97548   | 1        | 1        |
| module_236 | 1.10E-06                     | GO:0009699 | phenylpropanoid biosynthetic process        | 128           | 5               | 0.2      | 7                  | 1.10E-06      | 0.8877    | 0.0782   | 1        |
| module_236 | 3.60E-08                     | GO:0009812 | flavonoid metabolic process                 | 65            | 5               | 0.1      | 3                  | 3.60E-08      | 0.97765   | 0.00703  | 1        |
| module_236 | 1.70E-06                     | GO:0009813 | flavonoid biosynthetic process              | 59            | 4               | 0.09     | 8                  | 1.70E-06      | 0.9653    | 0.00196  | 1        |
| module_236 | 2.90E-07                     | GO:0019438 | aromatic compound biosynthetic process      | 194           | 6               | 0.3      | 6                  | 2.90E-07      | 0.99665   | 0.13349  | 1        |
| module_236 | 6.00E-08                     | GO:0019748 | secondary metabolic process                 | 261           | 7               | 0.41     | 5                  | 6.00E-08      | 0.82491   | 1        | 1        |
| module_236 | 8.00E-06                     | GO:0042398 | cellular amino acid derivative biosynthe... | 192           | 5               | 0.3      | 10                 | 8.00E-06      | 0.66457   | 0.14569  | 1        |
| module_237 | 1.70E-09                     | GO:0006412 | translation                                 | 576           | 7               | 0.39     | 1                  | 1.70E-09      | 0.19391   | 1.70E-09 | 1.70E-09 |
| module_237 | 2.30E-06                     | GO:0009059 | macromolecule biosynthetic process          | 1610          | 7               | 1.1      | 4                  | 2.30E-06      | 0.14067   | 1        | 1        |
| module_237 | 1.40E-06                     | GO:0010467 | gene expression                             | 1498          | 7               | 1.02     | 2                  | 1.40E-06      | 0.31593   | 1        | 1        |
| module_237 | 2.30E-06                     | GO:0034645 | cellular macromolecule biosynthetic proc... | 1605          | 7               | 1.09     | 3                  | 2.30E-06      | 0.15373   | 1        | 1        |
| module_249 | 1.10E-08                     | GO:0006558 | L-phenylalanine metabolic process           | 19            | 4               | 0.03     | 2                  | 1.10E-08      | 1         | 1        | 1.10E-08 |
| module_249 | 1.80E-06                     | GO:0009698 | phenylpropanoid metabolic process           | 153           | 5               | 0.22     | 7                  | 1.80E-06      | 0.99428   | 3.90E-05 | 3.90E-05 |
| module_249 | 1.80E-07                     | GO:0019438 | aromatic compound biosynthetic process      | 194           | 6               | 0.28     | 4                  | 1.80E-07      | 0.99665   | 0.00113  | 6.90E-05 |
| module_249 | 2.80E-07                     | GO:0006519 | cellular amino acid and derivative metab... | 546           | 8               | 0.8      | 5                  | 2.80E-07      | 0.78633   | 0.266    | 1        |
| module_249 | 1.80E-09                     | GO:0006725 | cellular aromatic compound metabolic pro... | 286           | 8               | 0.42     | 1                  | 1.80E-09      | 0.97548   | 1        | 1        |
| module_249 | 2.90E-08                     | GO:0009072 | aromatic amino acid family metabolic pro... | 67            | 5               | 0.1      | 3                  | 2.90E-08      | 0.98401   | 0.05036  | 1        |
| module_249 | 3.00E-06                     | GO:0043648 | dicarboxylic acid metabolic process         | 73            | 4               | 0.11     | 8                  | 3.00E-06      | 0.88944   | 0.00313  | 1        |
| module_249 | 1.40E-06                     | GO:0044281 | small molecule metabolic process            | 1277          | 10              | 1.87     | 6                  | 1.40E-06      | 0.91529   | 1        | 1        |
| module_259 | 3.90E-12                     | GO:0006511 | ubiquitin-dependent protein catabolic pr... | 182           | 8               | 0.21     | 1                  | 3.90E-12      | 0.4383    | 3.90E-12 | 3.90E-12 |
| module_259 | 1.90E-08                     | GO:0006508 | proteolysis                                 | 527           | 8               | 0.62     | 10                 | 1.90E-08      | 0.49625   | 1        | 1        |
| module_259 | 1.20E-07                     | GO:0009056 | catabolic process                           | 664           | 8               | 0.78     | 11                 | 1.20E-07      | 0.95544   | 1        | 1        |
| module_259 | 7.30E-11                     | GO:0009057 | macromolecule catabolic process             | 262           | 8               | 0.31     | 8                  | 7.30E-11      | 0.75168   | 1        | 1        |
| module_259 | 4.10E-12                     | GO:0019941 | modification-dependent protein catabolic... | 183           | 8               | 0.21     | 2                  | 4.10E-12      | 0.49042   | 1        | 1        |
| module_259 | 9.10E-12                     | GO:0030163 | protein catabolic process                   | 202           | 8               | 0.24     | 6                  | 9.10E-12      | 0.34961   | 1        | 1        |
| module_259 | 4.10E-12                     | GO:0043632 | modification-dependent macromolecule cat... | 183           | 8               | 0.21     | 3                  | 4.10E-12      | 0.49042   | 1        | 1        |
| module_259 | 5.50E-09                     | GO:0044    |                                             |               |                 |          |                    |               |           |          |          |

|            |          |            |                                             |      |    |       |    |          |         |          |          |
|------------|----------|------------|---------------------------------------------|------|----|-------|----|----------|---------|----------|----------|
| module_259 | 9.40E-12 | GO:0044265 | cellular macromolecule catabolic process    | 203  | 8  | 0.24  | 7  | 9.40E-12 | 0.49969 | 1        | 1        |
| module_259 | 4.30E-12 | GO:0051603 | proteolysis involved in cellular protein... | 184  | 8  | 0.22  | 4  | 4.30E-12 | 0.4565  | 1        | 1        |
| module_261 | 6.00E-06 | GO:0046865 | terpenoid transport                         | 6    | 2  | 0     | 1  | 6.00E-06 | 0.81549 | 6.00E-06 | 6.00E-06 |
| module_261 | 6.00E-06 | GO:0046864 | isoprenoid transport                        | 6    | 2  | 0     | 2  | 6.00E-06 | 0.81549 | 1        | 1        |
| module_263 | 2.60E-06 | GO:0048700 | acquisition of desiccation tolerance        | 3    | 2  | 0     | 1  | 2.60E-06 | 1       | 2.60E-06 | 2.60E-06 |
| module_265 | 3.00E-08 | GO:0006633 | fatty acid biosynthetic process             | 92   | 4  | 0.04  | 1  | 3.00E-08 | 0.57779 | 3.00E-08 | 3.00E-08 |
| module_265 | 2.10E-07 | GO:0006631 | fatty acid metabolic process                | 148  | 4  | 0.07  | 2  | 2.10E-07 | 0.16502 | 1        | 1        |
| module_265 | 1.20E-06 | GO:0008610 | lipid biosynthetic process                  | 229  | 4  | 0.11  | 3  | 1.20E-06 | 0.35523 | 1        | 1        |
| module_265 | 2.60E-06 | GO:0016053 | organic acid biosynthetic process           | 279  | 4  | 0.14  | 5  | 2.60E-06 | 0.93746 | 1        | 1        |
| module_265 | 2.20E-06 | GO:0032787 | monocarboxylic acid metabolic process       | 267  | 4  | 0.13  | 4  | 2.20E-06 | 0.94051 | 1        | 1        |
| module_265 | 4.00E-06 | GO:0044255 | cellular lipid metabolic process            | 311  | 4  | 0.15  | 7  | 4.00E-06 | 0.20016 | 1        | 1        |
| module_265 | 2.60E-06 | GO:0046394 | carboxylic acid biosynthetic process        | 279  | 4  | 0.14  | 6  | 2.60E-06 | 0.93746 | 1        | 1        |
| module_266 | 8.00E-06 | GO:0006355 | regulation of transcription, DNA-depende... | 369  | 4  | 0.18  | 1  | 8.00E-06 | 0.89439 | 8.00E-06 | 8.00E-06 |
| module_266 | 8.60E-06 | GO:0051252 | regulation of RNA metabolic process         | 376  | 4  | 0.18  | 2  | 8.60E-06 | 0.92283 | 1        | 1        |
| module_271 | 6.00E-06 | GO:0018401 | peptidyl-proline hydroxylation to 4-hydr... | 7    | 2  | 0     | 1  | 6.00E-06 | 1       | 6.00E-06 | 6.00E-06 |
| module_271 | 6.00E-06 | GO:0018208 | peptidyl-proline modification               | 7    | 2  | 0     | 2  | 6.00E-06 | 1       | 1        | 1        |
| module_271 | 6.00E-06 | GO:0019471 | 4-hydroxyproline metabolic process          | 7    | 2  | 0     | 3  | 6.00E-06 | 1       | 1        | 1        |
| module_271 | 6.00E-06 | GO:0019511 | peptidyl-proline hydroxylation              | 7    | 2  | 0     | 4  | 6.00E-06 | 1       | 1        | 1        |
| module_272 | 9.00E-06 | GO:0006096 | glycolysis                                  | 80   | 3  | 0.05  | 1  | 9.00E-06 | 0.82105 | 9.00E-06 | 9.00E-06 |
| module_277 | 1.10E-14 | GO:0009408 | response to heat                            | 107  | 7  | 0.07  | 1  | 1.10E-14 | 0.84791 | 1.10E-14 | 1.10E-14 |
| module_277 | 1.40E-06 | GO:0042542 | response to hydrogen peroxide               | 36   | 3  | 0.02  | 5  | 1.40E-06 | 0.99734 | 1.40E-06 | 1.40E-06 |
| module_277 | 1.90E-06 | GO:0009644 | response to high light intensity            | 40   | 3  | 0.03  | 6  | 1.90E-06 | 0.95189 | 1.90E-06 | 1.90E-06 |
| module_277 | 5.50E-06 | GO:0006457 | protein folding                             | 208  | 4  | 0.14  | 8  | 5.50E-06 | 0.96837 | 5.50E-06 | 5.50E-06 |
| module_277 | 5.60E-06 | GO:0000302 | response to reactive oxygen species         | 57   | 3  | 0.04  | 9  | 5.60E-06 | 0.84566 | 1        | 1        |
| module_277 | 1.00E-06 | GO:0006950 | response to stress                          | 1432 | 7  | 0.98  | 4  | 1.00E-06 | 0.46267 | 1        | 1        |
| module_277 | 3.70E-11 | GO:0009266 | response to temperature stimulus            | 335  | 7  | 0.23  | 2  | 3.70E-11 | 0.64964 | 1        | 1        |
| module_277 | 3.90E-08 | GO:0009628 | response to abiotic stimulus                | 899  | 7  | 0.61  | 3  | 3.90E-08 | 0.84806 | 1        | 1        |
| module_277 | 8.30E-06 | GO:0009642 | response to light intensity                 | 65   | 3  | 0.04  | 10 | 8.30E-06 | 0.92282 | 1        | 1        |
| module_277 | 3.00E-06 | GO:0010035 | response to inorganic substance             | 448  | 5  | 0.31  | 7  | 3.00E-06 | 0.83165 | 1        | 1        |
| module_285 | 1.30E-08 | GO:0006412 | translation                                 | 576  | 7  | 0.45  | 1  | 1.30E-08 | 0.25234 | 1.30E-08 | 1.30E-08 |
| module_285 | 9.70E-06 | GO:0010467 | gene expression                             | 1498 | 7  | 1.17  | 2  | 9.70E-06 | 0.38433 | 1        | 1        |
| module_286 | 1.50E-22 | GO:0006334 | nucleosome assembly                         | 81   | 12 | 0.13  | 1  | 1.50E-22 | 0.4731  | 1.50E-22 | 1.50E-22 |
| module_286 | 2.00E-22 | GO:0006323 | DNA packaging                               | 83   | 12 | 0.14  | 4  | 2.00E-22 | 0.43804 | 1        | 1        |
| module_286 | 3.20E-19 | GO:0006325 | chromatin organization                      | 149  | 12 | 0.25  | 8  | 3.20E-19 | 0.45415 | 1        | 1        |
| module_286 | 3.60E-21 | GO:0006333 | chromatin assembly or disassembly           | 104  | 12 | 0.17  | 7  | 3.60E-21 | 0.2106  | 1        | 1        |
| module_286 | 1.20E-13 | GO:0006996 | organelle organization                      | 428  | 12 | 0.71  | 15 | 1.20E-13 | 0.32683 | 1        | 1        |
| module_286 | 3.40E-12 | GO:0016043 | cellular component organization             | 762  | 13 | 1.26  | 17 | 3.40E-12 | 0.3399  | 0.2925   | 1        |
| module_286 | 1.70E-15 | GO:0022607 | cellular component assembly                 | 300  | 12 | 0.5   | 14 | 1.70E-15 | 0.48637 | 1        | 1        |
| module_286 | 1.70E-22 | GO:0031497 | chromatin assembly                          | 82   | 12 | 0.14  | 3  | 1.70E-22 | 0.52009 | 1        | 1        |
| module_286 | 1.90E-17 | GO:0034621 | cellular macromolecular complex subunit ... | 207  | 12 | 0.34  | 11 | 1.90E-17 | 0.68078 | 1        | 1        |
| module_286 | 7.90E-18 | GO:0034622 | cellular macromolecular complex assembly    | 193  | 12 | 0.32  | 10 | 7.90E-18 | 0.58741 | 1        | 1        |
| module_286 | 1.50E-22 | GO:0034728 | nucleosome organization                     | 81   | 12 | 0.13  | 2  | 1.50E-22 | 0.4731  | 1        | 1        |
| module_286 | 1.10E-15 | GO:0043933 | macromolecular complex subunit organizat... | 289  | 12 | 0.48  | 13 | 1.10E-15 | 0.57566 | 1        | 1        |
| module_286 | 7.00E-13 | GO:0044085 | cellular component biogenesis               | 496  | 12 | 0.82  | 16 | 7.00E-13 | 0.75816 | 1        | 1        |
| module_286 | 1.50E-18 | GO:0051276 | chromosome organization                     | 169  | 12 | 0.28  | 9  | 1.50E-18 | 0.47649 | 1        | 1        |
| module_286 | 5.90E-16 | GO:0065003 | macromolecular complex assembly             | 275  | 12 | 0.46  | 12 | 5.90E-16 | 0.49443 | 1        | 1        |
| module_286 | 2.00E-22 | GO:0065004 | protein-DNA complex assembly                | 83   | 12 | 0.14  | 5  | 2.00E-22 | 0.56749 | 1        | 1        |
| module_286 | 2.20E-21 | GO:0071103 | DNA conformation change                     | 100  | 12 | 0.17  | 6  | 2.20E-21 | 0.34448 | 1        | 1        |
| module_290 | < 1e-30  | GO:0006412 | translation                                 | 576  | 53 | 3.59  | 1  | < 1e-30  | 0.95546 | < 1e-30  | < 1e-30  |
| module_290 | 1.90E-14 | GO:0042254 | ribosome biogenesis                         | 154  | 15 | 0.96  | 11 | 1.90E-14 | 0.99995 | 1.90E-14 | 1.90E-14 |
| module_290 | < 1e-30  | GO:0034645 | cellular macromolecule biosynthetic proc... | 1605 | 55 | 10    | 3  | < 1e-30  | 0.61303 | 0.329    | 0.5183   |
| module_290 | < 1e-30  | GO:0010467 | gene expression                             | 1498 | 55 | 9.34  | 2  | < 1e-30  | 0.86828 | 0.2819   | 0.5937   |
| module_290 | < 1e-30  | GO:0009059 | macromolecule biosynthetic process          | 1610 | 55 | 10.04 | 4  | < 1e-30  | 0.58445 | 0.3312   | 0.6435   |
| module_290 | 2.30E-06 | GO:0006414 | translational elongation                    | 35   | 5  | 0.22  | 17 | 2.30E-06 | 0.99962 | 2.30E-06 | 1        |
| module_290 | 4.70E-06 | GO:0008152 | metabolic process                           | 6134 | 55 | 38.24 | 18 | 4.70E-06 | 0.6545  | 0.9987   | 1        |
| module_290 | 1.20E-24 | GO:0009058 | biosynthetic process                        | 2570 | 55 | 16.02 | 7  | 1.20E-24 | 0.76134 | 0.6947   | 1        |
| module_290 | 4.40E-07 | GO:0009987 | cellular process                            | 6016 | 56 | 37.5  | 16 | 4.40E-07 | 0.63214 | 0.9875   | 1        |
| module_290 | 1.80E-24 | GO:0019538 | protein metabolic process                   | 2320 | 53 | 14.46 | 8  | 1.80E-24 | 0.75974 | 1        | 1        |
| module_290 | 2.10E-14 | GO:0022613 | ribonucleoprotein complex biogenesis        | 155  | 15 | 0.97  | 12 | 2.10E-14 | 0.99995 | 1        | 1        |
| module_290 | 2.00E-17 | GO:0043170 | macromolecule metabolic process             | 3543 | 55 | 22.09 | 10 | 2.00E-17 | 0.9834  | 0.8951   | 1        |
| module_290 | 2.60E-07 | GO:0044085 | cellular component biogenesis               | 496  | 15 | 3.09  | 15 | 2.60E-07 | 0.64819 | 1        | 1        |
| module_290 | 6.10E-11 | GO:0044237 | cellular metabolic process                  | 4791 | 55 | 29.87 | 13 | 6.10E-11 | 0.73795 | 0.9823   | 1        |
| module_290 | 1.90E-10 | GO:0044238 | primary metabolic process                   | 4907 | 55 | 30.59 | 14 | 1.90E-10 | 0.78822 | 0.9854   | 1        |
| module_290 | 1.40E-25 | GO:0044249 | cellular biosynthetic process               | 2467 | 55 | 15.38 | 6  | 1.40E-25 | 0.67123 | 0.6634   | 1        |
| module_290 | 5.50E-20 | GO:0044260 | cellular macromolecule metabolic process    | 3156 | 55 | 19.67 | 9  | 5.50E-20 | 0.9747  | 0.8344   | 1        |
| module_290 | 7.70E-28 | GO:0044267 | cellular protein metabolic process          | 1991 | 53 | 12.41 | 5  | 7.70E-28 | 0.8444  | 1        | 1        |
| module_293 | 1.20E-08 | GO:0006418 | tRNA aminoacylation for protein translat... | 73   | 4  | 0.04  | 1  | 1.20E-08 | 0.71782 | 1        | 1.20E-08 |
| module_293 | 6.30E-08 | GO:0048481 | ovule development                           | 20   | 3  | 0.01  | 5  | 6.30E-08 | 0.9993  | 6.30E-08 | 6.30E-08 |
| module_293 | 4.90E-08 | GO:0006399 | tRNA metabolic process                      | 104  | 4  | 0.05  | 4  | 4.90E-08 | 0.74577 | 1        | 1        |
| module_293 | 1.90E-06 | GO:0006431 | methionyl-tRNA aminoacylation               | 5    | 2  | 0     | 11 | 1.90E-06 | 1       | 1.90E-06 | 1        |
| module_293 | 6.20E-06 | GO:0006520 | cellular amino acid metabolic process       | 346  | 4  | 0.17  | 12 | 6.20E-06 | 0.51051 | 1        | 1        |
| module_293 | 1.60E-07 | GO:0034660 | ncRNA metabolic process                     | 139  | 4  | 0.07  | 8  | 1.60E-07 | 0.83546 | 1        | 1        |
| module_293 | 1.20E-08 | GO:0043038 | amino acid activation                       | 73   | 4  | 0.04  | 2  | 1.20E-08 | 0.71782 | 1        | 1        |
| module_293 | 1.20E-08 | GO:0043039 | tRNA aminoacylation                         | 73   | 4  | 0.04  | 3  | 1.20E-08 | 0.71782 | 1        | 1        |
| module_293 | 9.40E-06 | GO:0044106 | cellular amine metabolic process            | 384  | 4  | 0.19  | 14 | 9.40E-06 | 0.48329 | 1        | 1        |
| module_293 | 1.40E-06 | GO:0048437 | floral organ development                    | 54   | 3  | 0.03  | 10 | 1.40E-06 | 0.99641 | 1        | 1        |
| module_293 | 6.80E-07 | GO:0048438 | floral whorl development                    | 43   | 3  | 0.02  | 9  | 6.80E-07 | 0.99357 | 1        | 1        |
| module_293 | 8.50E-08 | GO:0048440 | carpel development                          | 22   | 3  | 0.01  | 6  | 8.50E-08 | 1       | 1        | 1        |
| module_293 | 8.50E-08 | GO:0048467 | gynoecium development                       | 22   | 3  | 0.01  | 7  | 8.50E-08 | 1       | 1        | 1        |
| module_293 | 8.30E-06 | GO:0048569 | post-embryonic organ development            | 98   | 3  | 0.05  | 13 | 8.30E-06 | 0.81071 | 1        | 1        |
| module_296 | 8.00E-06 | GO:0006552 | leucine catabolic process                   | 8    | 2  | 0     | 1  | 8.00E-06 | 0.93515 | 8.00E-06 | 8.00E-06 |
| module_303 | 8.90E-21 | GO:0009765 | photosynthesis, light harvesting            | 58   | 12 | 0.16  | 3  | 8.90E-21 | 0.99918 | 8.40E-12 | 8.90E-21 |
| module_303 | < 1e-30  | GO:0015979 | photosynthesis                              | 175  | 23 | 0.48  | 1  | < 1e-30  | 0.88284 | 6.80E-14 | 3.70E-15 |
| module_303 | 6.30E-16 | GO:0006091 | generation of precursor metabolites and ... | 326  | 15 | 0.89  | 4  | 6.30E-16 | 0.89169 | 1        | 1        |
| module_303 | 1.30E-11 | GO:0009768 | photosynthesis, light harvesting in phot... | 9    | 5  | 0.02  | 5  | 1.30E-11 | 0.98069 | 1.30E-11 | 1        |
| module_303 | 7.10E-23 | GO:0019684 | photosynthesis, light reaction              | 115  | 15 | 0.31  | 2  | 7.10E-23 | 0.66004 | 1        | 1        |
| module_313 | 2.20E-18 | GO:0006412 | translation                                 | 576  | 15 | 0.9   | 1  | 2.20E-18 | 0.32844 | 2.20E-18 | 2.20E-18 |
| module_313 | 3.80E-12 | GO:0044267 | cellular protein metabolic process          | 1991 | 16 | 3.1   | 3  | 3.80E-12 | 0.35996 | 0.146    | 0.146    |
| module_313 | 1.10E-08 | GO:0009058 | biosynthetic process                        | 2570 | 15 | 4.01  | 9  | 1.10E-08 | 0.45087 | 1        | 1        |
| module_313 | 1.10E-11 | GO:0009059 | macromolecule biosynthetic process          | 1610 | 15 | 2.51  | 5  | 1.10E-11 | 0.19577 | 1        | 1        |
| module_313 | 3.80E-12 | GO:0010467 | gene expression                             | 1498 | 15 | 2.33  | 2  | 3.80E-12 | 0.4101  | 1        | 1        |
| module_313 | 4.40E-11 | GO:0019538 | protein metabolic process                   | 2320 | 16 | 3.62  | 6  | 4.40E-11 | 0.33173 | 0.18     | 1        |
| module_313 | 1.10E-11 | GO:0034645 | cellular macromolecule biosynthetic proc... | 1605 | 15 | 2.5   | 4  | 1.10E-11 | 0.21239 | 1        | 1        |
| module_313 | 4.00E-08 | GO:0043170 | macromolecule metabolic process             | 3543 | 16 | 5.52  | 10 | 4.00E-08 | 0.81158 | 0.3062   | 1        |
| module_313 | 5.00E-06 | GO:0044237 | cellular metabolic process                  | 4791 | 16 | 7.47  | 11 | 5.00E-06 | 0.48733 | 0.4349   | 1        |
| module_313 | 7.30E-06 | GO:0044238 | primary metabolic process                   | 4907 | 16 | 7.65  | 12 | 7.30E-06 | 0.50049 | 0.4469   | 1        |
| module_313 | 6.20E-09 | GO:0044249 | cellular biosynthetic process               | 2467 | 15 | 3.84  | 7  | 6.20E-09 | 0.35704 | 1        | 1        |
| module_313 | 6.20E-09 | GO:0044260 | cellular macromolecule metabolic process    | 3156 | 16 | 4.92  | 8  | 6.20E-09 | 0.79175 | 0.2662   | 1        |
| module_315 | 1.90E-07 | GO:0010025 | wax biosynthetic process                    | 14   | 4  | 0.05  | 1  | 1.90E-07 | 0.76043 | 1.90E-07 | 1.90E-07 |
| module_315 | 1.90E-07 | GO:0010166 | wax metabolic process                       | 14   | 4  | 0.05  | 2  | 1.90E-07 | 0.76043 | 1        | 1        |
| module_316 | 5.10E-06 | GO:0016068 | type I hypersensitivity                     | 4    | 2  | 0     | 1  | 5.10E-06 | 0.9408  | 5.10E-06 | 5.10E-06 |
| module_316 | 5.10E-06 | GO         |                                             |      |    |       |    |          |         |          |          |

|            |         |          |            |                                             |      |    |      |    |          |         |          |          |
|------------|---------|----------|------------|---------------------------------------------|------|----|------|----|----------|---------|----------|----------|
| module_316 |         | 5.10E-06 | GO:0016064 | immunoglobulin mediated immune response     | 4    | 2  | 0    | 10 | 5.10E-06 | 0.9408  | 1        | 1        |
| module_316 |         | 5.10E-06 | GO:0019724 | B cell mediated immunity                    | 4    | 2  | 0    | 11 | 5.10E-06 | 0.9408  | 1        | 1        |
| module_317 | < 1e-30 |          | GO:0009769 | photosynthesis, light harvesting in phot... | 18   | 13 | 0.04 | 1  | < 1e-30  | 1       | < 1e-30  | < 1e-30  |
| module_317 |         | 3.60E-07 | GO:0010114 | response to red light                       | 29   | 4  | 0.06 | 6  | 3.60E-07 | 0.92568 | 3.60E-07 | 3.60E-07 |
| module_317 |         | 5.50E-07 | GO:0010218 | response to far red light                   | 32   | 4  | 0.07 | 7  | 5.50E-07 | 0.96941 | 5.50E-07 | 5.50E-07 |
| module_317 |         | 7.90E-07 | GO:0009637 | response to blue light                      | 35   | 4  | 0.07 | 8  | 7.90E-07 | 0.82683 | 7.90E-07 | 7.90E-07 |
| module_317 | < 1e-30 |          | GO:0009765 | photosynthesis, light harvesting            | 58   | 16 | 0.12 | 2  | < 1e-30  | 0.99086 | 4.60E-06 | 4.60E-06 |
| module_317 |         | 4.70E-20 | GO:0006091 | generation of precursor metabolites and ... | 326  | 16 | 0.7  | 5  | 4.70E-20 | 0.89169 | 1        | 1        |
| module_317 |         | 1.70E-24 | GO:0015979 | photosynthesis                              | 175  | 16 | 0.37 | 4  | 1.70E-24 | 0.72673 | 1        | 1        |
| module_317 |         | 1.50E-27 | GO:0019684 | photosynthesis, light reaction              | 115  | 16 | 0.25 | 3  | 1.50E-27 | 0.77179 | 1        | 1        |
| module_319 |         | 3.00E-08 | GO:0006979 | response to oxidative stress                | 254  | 8  | 0.54 | 1  | 3.00E-08 | 0.55943 | 3.00E-08 | 3.00E-08 |
| module_323 |         | 1.60E-07 | GO:0009767 | photosynthetic electron transport chain     | 33   | 4  | 0.05 | 2  | 1.60E-07 | 0.86031 | 1.00E-05 | 1.60E-07 |
| module_323 |         | 3.70E-09 | GO:0015979 | photosynthesis                              | 175  | 7  | 0.27 | 1  | 3.70E-09 | 0.63435 | 0.00052  | 0.00052  |
| module_323 |         | 2.70E-07 | GO:0006091 | generation of precursor metabolites and ... | 326  | 7  | 0.51 | 3  | 2.70E-07 | 0.89169 | 0.02953  | 0.02995  |
| module_323 |         | 6.40E-07 | GO:0019684 | photosynthesis, light reaction              | 115  | 5  | 0.18 | 4  | 6.40E-07 | 0.76899 | 0.09207  | 1        |
| module_323 |         | 1.70E-06 | GO:0022900 | electron transport chain                    | 59   | 4  | 0.09 | 5  | 1.70E-06 | 0.87414 | 1        | 1        |
| module_333 |         | 8.50E-06 | GO:0009870 | defense response signaling pathway, resi... | 10   | 2  | 0    | 1  | 8.50E-06 | 0.708   | 8.50E-06 | 8.50E-06 |
| module_342 |         | 3.20E-06 | GO:0015700 | arsenite transport                          | 4    | 2  | 0    | 1  | 3.20E-06 | 1       | 3.20E-06 | 3.20E-06 |
| module_343 |         | 1.40E-08 | GO:0009408 | response to heat                            | 107  | 5  | 0.09 | 1  | 1.40E-08 | 0.84692 | 1.40E-08 | 1.40E-08 |
| module_343 |         | 1.10E-06 | GO:0006950 | response to stress                          | 1432 | 8  | 1.26 | 3  | 1.10E-06 | 0.48647 | 0.00782  | 0.00766  |
| module_343 |         | 8.90E-08 | GO:0009266 | response to temperature stimulus            | 335  | 6  | 0.29 | 2  | 8.90E-08 | 0.64527 | 0.0868   | 0.0868   |
| module_343 |         | 1.20E-06 | GO:0009628 | response to abiotic stimulus                | 899  | 7  | 0.79 | 4  | 1.20E-06 | 0.84507 | 1        | 1        |
| module_355 |         | 3.40E-07 | GO:0010289 | homogalacturonan biosynthetic process       | 4    | 2  | 0    | 1  | 3.40E-07 | 1       | 3.40E-07 | 3.40E-07 |
| module_355 |         | 4.40E-07 | GO:0000271 | polysaccharide biosynthetic process         | 79   | 3  | 0.02 | 3  | 4.40E-07 | 0.90439 | 1        | 1        |
| module_355 |         | 2.70E-06 | GO:0005976 | polysaccharide metabolic process            | 144  | 3  | 0.04 | 6  | 2.70E-06 | 0.9694  | 1        | 1        |
| module_355 |         | 5.60E-06 | GO:0016051 | carbohydrate biosynthetic process           | 183  | 3  | 0.05 | 9  | 5.60E-06 | 0.89274 | 1        | 1        |
| module_355 |         | 4.10E-07 | GO:0033692 | cellular polysaccharide biosynthetic pro... | 77   | 3  | 0.02 | 2  | 4.10E-07 | 0.9806  | 1        | 1        |
| module_355 |         | 2.70E-06 | GO:0034637 | cellular carbohydrate biosynthetic proce... | 144  | 3  | 0.04 | 7  | 2.70E-06 | 0.9354  | 1        | 1        |
| module_355 |         | 1.10E-06 | GO:0044264 | cellular polysaccharide metabolic proces... | 106  | 3  | 0.03 | 4  | 1.10E-06 | 0.95604 | 1        | 1        |
| module_355 |         | 3.10E-06 | GO:0045488 | pectin metabolic process                    | 11   | 2  | 0    | 8  | 3.10E-06 | 0.66776 | 1        | 1        |
| module_355 |         | 1.60E-06 | GO:0045489 | pectin biosynthetic process                 | 8    | 2  | 0    | 5  | 1.60E-06 | 0.93018 | 1        | 1        |
| module_356 |         | 1.30E-08 | GO:0009652 | thigmotropism                               | 6    | 3  | 0.01 | 1  | 1.30E-08 | 1       | 1.30E-08 | 1.30E-08 |
| module_356 |         | 3.60E-06 | GO:0009606 | tropism                                     | 33   | 3  | 0.03 | 3  | 3.60E-06 | 0.47255 | 1        | 1        |
| module_356 |         | 2.40E-07 | GO:0009612 | response to mechanical stimulus             | 14   | 3  | 0.01 | 2  | 2.40E-07 | 0.53646 | 1        | 1        |
| module_357 |         | 2.10E-08 | GO:0055062 | phosphate ion homeostasis                   | 4    | 3  | 0.01 | 1  | 2.10E-08 | 1       | 0.0033   | 2.10E-08 |
| module_357 |         | 3.20E-06 | GO:0030002 | cellular anion homeostasis                  | 2    | 2  | 0    | 4  | 3.20E-06 | 1       | 1        | 1        |
| module_357 |         | 3.20E-06 | GO:0030319 | cellular di-, tri-valent inorganic anion... | 2    | 2  | 0    | 5  | 3.20E-06 | 1       | 1        | 1        |
| module_357 |         | 3.20E-06 | GO:0030643 | cellular phosphate ion homeostasis          | 2    | 2  | 0    | 6  | 3.20E-06 | 1       | 3.20E-06 | 1        |
| module_357 |         | 2.10E-08 | GO:0055061 | di-, tri-valent inorganic anion homeosta... | 4    | 3  | 0.01 | 2  | 2.10E-08 | 1       | 1        | 1        |
| module_357 |         | 1.10E-07 | GO:0055081 | anion homeostasis                           | 6    | 3  | 0.01 | 3  | 1.10E-07 | 1       | 1        | 1        |
| module_358 |         | 1.10E-07 | GO:0019751 | polyol metabolic process                    | 32   | 3  | 0.01 | 1  | 1.10E-07 | 0.28065 | 1        | 1        |
| module_361 |         | 1.00E-06 | GO:0010477 | response to sulfur dioxide                  | 2    | 2  | 0    | 1  | 1.00E-06 | 1       | 1.00E-06 | 1.00E-06 |
| module_371 |         | 4.90E-06 | GO:0016070 | RNA metabolic process                       | 725  | 7  | 0.85 | 1  | 4.90E-06 | 0.992   | 0.0171   | 1        |
| module_375 |         | 3.40E-07 | GO:0015712 | hexose phosphate transport                  | 3    | 2  | 0    | 1  | 3.40E-07 | 0.71994 | 3.40E-07 | 3.40E-07 |
| module_375 |         | 3.40E-07 | GO:0008645 | hexose transport                            | 3    | 2  | 0    | 2  | 3.40E-07 | 0.71994 | 1        | 1        |
| module_375 |         | 3.40E-07 | GO:0015749 | monosaccharide transport                    | 3    | 2  | 0    | 3  | 3.40E-07 | 0.71994 | 1        | 1        |
| module_378 |         | 3.80E-08 | GO:0015977 | carbon fixation                             | 17   | 3  | 0.01 | 1  | 3.80E-08 | 0.99618 | 3.80E-08 | 3.80E-08 |
| module_378 |         | 3.80E-08 | GO:0071704 | organic substance metabolic process         | 17   | 3  | 0.01 | 2  | 3.80E-08 | 0.99618 | 1        | 1        |
| module_380 |         | 7.40E-14 | GO:0006412 | translation                                 | 576  | 14 | 1.12 | 1  | 7.40E-14 | 0.21129 | 9.00E-13 | 1.00E-11 |
| module_380 |         | 2.90E-08 | GO:0009058 | biosynthetic process                        | 2570 | 17 | 5.01 | 6  | 2.90E-08 | 0.41265 | 0.2744   | 1        |
| module_380 |         | 5.70E-09 | GO:0009059 | macromolecule biosynthetic process          | 1610 | 15 | 3.14 | 4  | 5.70E-09 | 0.16259 | 0.4919   | 1        |
| module_380 |         | 2.00E-09 | GO:0010467 | gene expression                             | 1498 | 15 | 2.92 | 2  | 2.00E-09 | 0.35518 | 0.4512   | 1        |
| module_380 |         | 9.40E-07 | GO:0019538 | protein metabolic process                   | 2320 | 15 | 4.52 | 8  | 9.40E-07 | 0.28911 | 0.696    | 1        |
| module_380 |         | 5.40E-09 | GO:0034645 | cellular macromolecule biosynthetic proc... | 1605 | 15 | 3.13 | 3  | 5.40E-09 | 0.17715 | 0.4902   | 1        |
| module_380 |         | 1.50E-08 | GO:0044249 | cellular biosynthetic process               | 2467 | 17 | 4.81 | 5  | 1.50E-08 | 0.32346 | 0.2526   | 1        |
| module_380 |         | 7.70E-06 | GO:0044260 | cellular macromolecule metabolic process    | 3156 | 16 | 6.15 | 9  | 7.70E-06 | 0.75678 | 0.5042   | 1        |
| module_380 |         | 1.10E-07 | GO:0044267 | cellular protein metabolic process          | 1991 | 15 | 3.88 | 7  | 1.10E-07 | 0.31588 | 0.6122   | 1        |
| module_391 |         | 5.90E-06 | GO:0006468 | protein amino acid phosphorylation          | 609  | 7  | 0.83 | 1  | 5.90E-06 | 0.38005 | 5.90E-06 | 5.90E-06 |
| module_400 |         | 4.10E-11 | GO:0006334 | nucleosome assembly                         | 81   | 6  | 0.08 | 1  | 4.10E-11 | 0.1673  | 4.10E-11 | 4.10E-11 |
| module_400 |         | 4.80E-11 | GO:0006323 | DNA packaging                               | 83   | 6  | 0.08 | 4  | 4.80E-11 | 0.15103 | 1        | 1        |
| module_400 |         | 1.70E-09 | GO:0006325 | chromatin organization                      | 149  | 6  | 0.15 | 8  | 1.70E-09 | 0.21657 | 1        | 1        |
| module_400 |         | 1.90E-10 | GO:0006333 | chromatin assembly or disassembly           | 104  | 6  | 0.1  | 7  | 1.90E-10 | 0.06255 | 1        | 1        |
| module_400 |         | 9.20E-07 | GO:0006996 | organelle organization                      | 428  | 6  | 0.42 | 15 | 9.20E-07 | 0.20232 | 1        | 1        |
| module_400 |         | 1.10E-07 | GO:0022607 | cellular component assembly                 | 300  | 6  | 0.29 | 14 | 1.10E-07 | 0.17257 | 1        | 1        |
| module_400 |         | 4.40E-11 | GO:0031497 | chromatin assembly                          | 82   | 6  | 0.08 | 3  | 4.40E-11 | 0.19544 | 1        | 1        |
| module_400 |         | 1.20E-08 | GO:0034621 | cellular macromolecular complex subunit ... | 207  | 6  | 0.2  | 11 | 1.20E-08 | 0.40558 | 1        | 1        |
| module_400 |         | 8.10E-09 | GO:0034622 | cellular macromolecular complex assembly    | 193  | 6  | 0.19 | 10 | 8.10E-09 | 0.25183 | 1        | 1        |
| module_400 |         | 4.10E-11 | GO:0034728 | nucleosome organization                     | 81   | 6  | 0.08 | 2  | 4.10E-11 | 0.1673  | 1        | 1        |
| module_400 |         | 9.00E-08 | GO:0043933 | macromolecular complex subunit organizat... | 289  | 6  | 0.28 | 13 | 9.00E-08 | 0.27763 | 1        | 1        |
| module_400 |         | 2.20E-06 | GO:0044085 | cellular component biogenesis               | 496  | 6  | 0.48 | 16 | 2.20E-06 | 0.5041  | 1        | 1        |
| module_400 |         | 3.60E-09 | GO:0051276 | chromosome organization                     | 169  | 6  | 0.16 | 9  | 3.60E-09 | 0.24367 | 1        | 1        |
| module_400 |         | 6.70E-08 | GO:0065003 | macromolecular complex assembly             | 275  | 6  | 0.27 | 12 | 6.70E-08 | 0.1711  | 1        | 1        |
| module_400 |         | 4.80E-11 | GO:0065004 | protein-DNA complex assembly                | 83   | 6  | 0.08 | 5  | 4.80E-11 | 0.22628 | 1        | 1        |
| module_400 |         | 1.50E-10 | GO:0071103 | DNA conformation change                     | 100  | 6  | 0.1  | 6  | 1.50E-10 | 0.11959 | 1        | 1        |
| module_403 |         | 1.50E-06 | GO:0010201 | response to continuous far red light sti... | 2    | 2  | 0    | 1  | 1.50E-06 | 1       | 1.50E-06 | 1.50E-06 |
| module_403 |         | 1.50E-06 | GO:0010203 | response to very low fluence red light s... | 2    | 2  | 0    | 2  | 1.50E-06 | 1       | 1.50E-06 | 1.50E-06 |
| module_403 |         | 8.90E-06 | GO:0007600 | sensory perception                          | 4    | 2  | 0.01 | 4  | 8.90E-06 | 0.99189 | 8.90E-06 | 8.90E-06 |
| module_403 |         | 8.90E-06 | GO:0010161 | red light signaling pathway                 | 4    | 2  | 0.01 | 5  | 8.90E-06 | 0.7377  | 8.90E-06 | 8.90E-06 |
| module_403 |         | 8.90E-06 | GO:0017006 | protein-tetrapyrrole linkage                | 4    | 2  | 0.01 | 6  | 8.90E-06 | 0.99189 | 8.90E-06 | 8.90E-06 |
| module_403 |         | 8.90E-06 | GO:0018298 | protein-chromophore linkage                 | 4    | 2  | 0.01 | 7  | 8.90E-06 | 0.99189 | 8.90E-06 | 8.90E-06 |
| module_403 |         | 8.90E-06 | GO:0003008 | system process                              | 4    | 2  | 0.01 | 8  | 8.90E-06 | 0.99189 | 1        | 1        |
| module_403 |         | 8.90E-06 | GO:0050877 | neurological system process                 | 4    | 2  | 0.01 | 9  | 8.90E-06 | 0.99189 | 1        | 1        |
| module_403 |         | 1.50E-06 | GO:0055122 | response to very low light intensity sti... | 2    | 2  | 0    | 3  | 1.50E-06 | 1       | 1        | 1        |
| module_403 |         | 8.90E-06 | GO:0071491 | cellular response to red light              | 4    | 2  | 0.01 | 10 | 8.90E-06 | 0.7377  | 1        | 1        |
| module_404 |         | 2.50E-09 | GO:0006468 | protein amino acid phosphorylation          | 609  | 7  | 0.42 | 1  | 2.50E-09 | 0.43286 | 2.50E-09 | 2.50E-09 |
| module_404 |         | 1.50E-07 | GO:0006464 | protein modification process                | 1086 | 7  | 0.74 | 6  | 1.50E-07 | 0.26963 | 1        | 1        |
| module_404 |         | 1.40E-08 | GO:0006793 | phosphorus metabolic process                | 775  | 7  | 0.53 | 4  | 1.40E-08 | 0.22624 | 1        | 1        |
| module_404 |         | 1.30E-08 | GO:0006796 | phosphate metabolic process                 | 774  | 7  | 0.53 | 3  | 1.30E-08 | 0.23398 | 1        | 1        |
| module_404 |         | 6.20E-09 | GO:0016310 | phosphorylation                             | 693  | 7  | 0.47 | 2  | 6.20E-09 | 0.43395 | 1        | 1        |
| module_404 |         | 2.10E-07 | GO:0043412 | macromolecule modification                  | 1141 | 7  | 0.78 | 7  | 2.10E-07 | 0.31187 | 1        | 1        |
| module_404 |         | 2.50E-08 | GO:0043687 | post-translational protein modification     | 847  | 7  | 0.58 | 5  | 2.50E-08 | 0.26777 | 1        | 1        |
| module_406 |         | 6.60E-14 | GO:0009961 | response to 1-aminocyclopropane-1-carbox... | 7    | 5  | 0.01 | 1  | 6.60E-14 | 1       | 6.60E-14 | 6.60E-14 |
| module_406 |         | 3.60E-11 | GO:0009631 | cold acclimation                            | 19   | 5  | 0.03 | 2  | 3.60E-11 | 1       | 3.60E-11 | 3.60E-11 |
| module_406 |         | 5.20E-08 | GO:0009414 | response to water deprivation               | 157  | 6  | 0.23 | 3  | 5.20E-08 | 1       | 5.20E-08 | 5.20E-08 |
| module_406 |         | 8.60E-07 | GO:0009790 | embryo development                          | 252  | 6  | 0.37 | 5  | 8.60E-07 | 0.15193 | 0.00087  | 8.60E-07 |
| module_406 |         | 6.30E-06 | GO:0009737 | response to abscisic acid stimulus          | 197  | 5  | 0.29 | 6  | 6.30E-06 | 0.99996 | 6.30E-06 | 6.30E-06 |
| module_406 |         | 8.30E-08 | GO:0009415 | response to water                           | 170  | 6  | 0.25 | 4  | 8.30E-08 | 1       | 1        | 1        |
| module_408 |         | 1.10E-11 | GO:0007018 | microtubule-based movement                  | 37   | 6  | 0.06 | 2  | 1.10E-11 | 0.81338 | 1.10E-11 | 1.10E-11 |
| module_408 |         | 6.80E-06 | GO:0051225 |                                             |      |    |      |    |          |         |          |          |

|            |          |            |                                             |      |    |       |    |          |         |          |          |
|------------|----------|------------|---------------------------------------------|------|----|-------|----|----------|---------|----------|----------|
| module_41  | 3.30E-07 | GO:0043170 | macromolecule metabolic process             | 3543 | 14 | 4.83  | 10 | 3.30E-07 | 0.79715 | 1        | 1        |
| module_41  | 2.10E-09 | GO:0044249 | cellular biosynthetic process               | 2467 | 14 | 3.36  | 7  | 2.10E-09 | 0.31192 | 1        | 1        |
| module_41  | 6.60E-08 | GO:0044260 | cellular macromolecule metabolic process    | 3156 | 14 | 4.3   | 9  | 6.60E-08 | 0.74743 | 1        | 1        |
| module_41  | 1.00E-10 | GO:0044267 | cellular protein metabolic process          | 1991 | 14 | 2.71  | 5  | 1.00E-10 | 0.31981 | 1        | 1        |
| module_410 | 9.20E-21 | GO:0006412 | translation                                 | 576  | 19 | 1.29  | 1  | 9.20E-21 | 0.26418 | 9.20E-21 | 9.20E-21 |
| module_410 | 3.00E-08 | GO:0042254 | ribosome biogenesis                         | 154  | 7  | 0.34  | 11 | 3.00E-08 | 0.99381 | 3.00E-08 | 3.00E-08 |
| module_410 | 6.90E-10 | GO:0009058 | biosynthetic process                        | 2570 | 20 | 5.76  | 7  | 6.90E-10 | 0.41265 | 1        | 1        |
| module_410 | 2.20E-12 | GO:0009059 | macromolecule biosynthetic process          | 1610 | 19 | 3.61  | 4  | 2.20E-12 | 0.18005 | 1        | 1        |
| module_410 | 5.80E-13 | GO:0010467 | gene expression                             | 1498 | 19 | 3.36  | 2  | 5.80E-13 | 0.38433 | 1        | 1        |
| module_410 | 1.70E-09 | GO:0019538 | protein metabolic process                   | 2320 | 19 | 5.2   | 8  | 1.70E-09 | 0.37674 | 1        | 1        |
| module_410 | 3.10E-08 | GO:0022613 | ribonucleoprotein complex biogenesis        | 155  | 7  | 0.35  | 12 | 3.10E-08 | 0.99711 | 1        | 1        |
| module_410 | 2.10E-12 | GO:0034645 | cellular macromolecule biosynthetic proc... | 1605 | 19 | 3.6   | 3  | 2.10E-12 | 0.19571 | 1        | 1        |
| module_410 | 2.20E-08 | GO:0043170 | macromolecule metabolic process             | 3543 | 21 | 7.94  | 10 | 2.20E-08 | 0.82688 | 0.359    | 1        |
| module_410 | 6.50E-07 | GO:0044237 | cellular metabolic process                  | 4791 | 22 | 10.73 | 13 | 6.50E-07 | 0.56269 | 0.403    | 1        |
| module_410 | 1.10E-06 | GO:0044238 | primary metabolic process                   | 4907 | 22 | 10.99 | 14 | 1.10E-06 | 0.56207 | 0.42     | 1        |
| module_410 | 3.20E-10 | GO:0044249 | cellular biosynthetic process               | 2467 | 20 | 5.53  | 6  | 3.20E-10 | 0.32346 | 1        | 1        |
| module_410 | 2.10E-09 | GO:0044260 | cellular macromolecule metabolic process    | 3156 | 21 | 7.07  | 9  | 2.10E-09 | 0.78063 | 0.289    | 1        |
| module_410 | 1.10E-10 | GO:0044267 | cellular protein metabolic process          | 1991 | 19 | 4.46  | 5  | 1.10E-10 | 0.41866 | 1        | 1        |
| module_413 | 1.90E-07 | GO:0005998 | xylulose catabolic process                  | 2    | 2  | 0     | 3  | 1.90E-07 | 1       | 1.90E-07 | 1.90E-07 |
| module_413 | 4.00E-06 | GO:0006573 | valine metabolic process                    | 7    | 2  | 0     | 11 | 4.00E-06 | 1       | 4.00E-06 | 4.00E-06 |
| module_413 | 4.10E-07 | GO:0005996 | monosaccharide metabolic process            | 176  | 4  | 0.09  | 5  | 4.10E-07 | 0.89757 | 1        | 1        |
| module_413 | 5.70E-07 | GO:0005997 | xylulose metabolic process                  | 3    | 2  | 0     | 7  | 5.70E-07 | 1       | 1        | 1        |
| module_413 | 1.50E-06 | GO:0006066 | alcohol metabolic process                   | 244  | 4  | 0.12  | 9  | 1.50E-06 | 0.89312 | 1        | 1        |
| module_413 | 5.00E-07 | GO:0016052 | carbohydrate catabolic process              | 185  | 4  | 0.09  | 6  | 5.00E-07 | 0.75488 | 1        | 1        |
| module_413 | 1.10E-06 | GO:0019323 | pentose catabolic process                   | 4    | 2  | 0     | 8  | 1.10E-06 | 0.81127 | 1        | 1        |
| module_413 | 2.20E-07 | GO:0044275 | cellular carbohydrate catabolic process     | 151  | 4  | 0.07  | 4  | 2.20E-07 | 0.69897 | 1        | 1        |
| module_413 | 1.50E-06 | GO:0044282 | small molecule catabolic process            | 244  | 4  | 0.12  | 10 | 1.50E-06 | 0.89312 | 1        | 1        |
| module_413 | 7.10E-08 | GO:0046164 | alcohol catabolic process                   | 114  | 4  | 0.06  | 2  | 7.10E-08 | 0.81672 | 1        | 1        |
| module_413 | 5.30E-08 | GO:0046365 | monosaccharide catabolic process            | 106  | 4  | 0.05  | 1  | 5.30E-08 | 0.8674  | 1        | 1        |
| module_414 | 9.80E-06 | GO:0006412 | translation                                 | 576  | 4  | 0.22  | 1  | 9.80E-06 | 0.22174 | 9.80E-06 | 9.80E-06 |
| module_419 | 7.50E-06 | GO:0051555 | flavonol biosynthetic process               | 12   | 2  | 0     | 1  | 7.50E-06 | 0.85007 | 7.50E-06 | 7.50E-06 |
| module_419 | 7.50E-06 | GO:0051552 | flavone metabolic process                   | 12   | 2  | 0     | 2  | 7.50E-06 | 0.85007 | 1        | 1        |
| module_419 | 7.50E-06 | GO:0051553 | flavone biosynthetic process                | 12   | 2  | 0     | 3  | 7.50E-06 | 0.85007 | 1        | 1        |
| module_419 | 7.50E-06 | GO:0051554 | flavonol metabolic process                  | 12   | 2  | 0     | 4  | 7.50E-06 | 0.85007 | 1        | 1        |
| module_421 | 6.40E-06 | GO:0006796 | phosphate metabolic process                 | 774  | 10 | 1.88  | 1  | 6.40E-06 | 0.36447 | 0.0163   | 0.2449   |
| module_421 | 6.50E-06 | GO:0006793 | phosphorus metabolic process                | 775  | 10 | 1.89  | 2  | 6.50E-06 | 0.35423 | 0.0166   | 1        |
| module_429 | 6.80E-07 | GO:0009765 | photosynthesis, light harvesting            | 58   | 3  | 0.02  | 1  | 6.80E-07 | 0.95703 | 6.70E-05 | 6.80E-07 |
| module_429 | 5.40E-06 | GO:0019684 | photosynthesis, light reaction              | 115  | 3  | 0.04  | 2  | 5.40E-06 | 0.55294 | 1        | 1        |
| module_433 | 1.70E-06 | GO:0016119 | carotene metabolic process                  | 10   | 3  | 0.03  | 1  | 1.70E-06 | 0.19307 | 1        | 1.70E-06 |
| module_433 | 5.10E-06 | GO:0042440 | pigment metabolic process                   | 103  | 5  | 0.26  | 2  | 5.10E-06 | 0.2751  | 1        | 1        |
| module_443 | 4.20E-08 | GO:0006412 | translation                                 | 576  | 9  | 0.9   | 1  | 4.20E-08 | 0.21623 | 4.20E-08 | 4.20E-08 |
| module_447 | 2.30E-06 | GO:0015074 | DNA integration                             | 16   | 2  | 0     | 1  | 2.30E-06 | 0.23164 | 2.30E-06 | 2.30E-06 |
| module_448 | 1.70E-06 | GO:0001666 | response to hypoxia                         | 15   | 3  | 0.02  | 1  | 1.70E-06 | 0.51008 | 1.70E-06 | 1.70E-06 |
| module_448 | 1.70E-06 | GO:0070482 | response to oxygen levels                   | 15   | 3  | 0.02  | 2  | 1.70E-06 | 0.51008 | 1        | 1        |
| module_456 | 2.60E-06 | GO:0045337 | farnesyl diphosphate biosynthetic proces... | 3    | 2  | 0     | 1  | 2.60E-06 | 0.87986 | 2.60E-06 | 2.60E-06 |
| module_456 | 5.10E-06 | GO:0016090 | prenol metabolic process                    | 4    | 2  | 0     | 4  | 5.10E-06 | 0.96903 | 1        | 1        |
| module_456 | 2.60E-06 | GO:0016091 | prenol biosynthetic process                 | 3    | 2  | 0     | 2  | 2.60E-06 | 0.87986 | 1        | 1        |
| module_456 | 5.10E-06 | GO:0016093 | polyprenol metabolic process                | 4    | 2  | 0     | 5  | 5.10E-06 | 0.96903 | 1        | 1        |
| module_456 | 2.60E-06 | GO:0016094 | polyprenol biosynthetic process             | 3    | 2  | 0     | 3  | 2.60E-06 | 0.87986 | 1        | 1        |
| module_456 | 5.10E-06 | GO:0045338 | farnesyl diphosphate metabolic process      | 4    | 2  | 0     | 6  | 5.10E-06 | 0.96903 | 1        | 1        |
| module_467 | 7.80E-09 | GO:0006457 | protein folding                             | 208  | 10 | 0.85  | 1  | 7.80E-09 | 0.96696 | 7.80E-09 | 8.20E-08 |
| module_467 | 6.80E-07 | GO:0006779 | porphyrin biosynthetic process              | 42   | 5  | 0.17  | 2  | 6.80E-07 | 0.39304 | 4.30E-05 | 6.80E-07 |
| module_467 | 9.80E-07 | GO:0044237 | cellular metabolic process                  | 4791 | 35 | 19.6  | 3  | 9.80E-07 | 0.57226 | 0.0098   | 0.5486   |
| module_467 | 2.90E-06 | GO:0006778 | porphyrin metabolic process                 | 56   | 5  | 0.23  | 5  | 2.90E-06 | 0.85856 | 1        | 1        |
| module_467 | 3.50E-06 | GO:0033013 | tetrapyrrole metabolic process              | 58   | 5  | 0.24  | 6  | 3.50E-06 | 0.95083 | 1        | 1        |
| module_467 | 1.10E-06 | GO:0033014 | tetrapyrrole biosynthetic process           | 46   | 5  | 0.19  | 4  | 1.10E-06 | 0.59297 | 1        | 1        |
| module_467 | 7.80E-06 | GO:0044267 | cellular protein metabolic process          | 1991 | 21 | 8.14  | 7  | 7.80E-06 | 0.37317 | 0.1179   | 1        |
| module_471 | 8.70E-07 | GO:0043086 | negative regulation of catalytic activit... | 31   | 3  | 0.02  | 1  | 8.70E-07 | 0.8741  | 8.70E-07 | 8.70E-07 |
| module_471 | 1.40E-06 | GO:0007186 | G-protein coupled receptor protein signa... | 36   | 3  | 0.02  | 2  | 1.40E-06 | 0.9961  | 1.40E-06 | 1.40E-06 |
| module_471 | 1.40E-06 | GO:0044092 | negative regulation of molecular functio... | 36   | 3  | 0.02  | 3  | 1.40E-06 | 0.76524 | 1        | 1        |
| module_473 | 4.40E-06 | GO:0006396 | RNA processing                              | 197  | 4  | 0.13  | 1  | 4.40E-06 | 0.6695  | 0.05965  | 0.05928  |
| module_476 | 1.70E-06 | GO:0010143 | cutin biosynthetic process                  | 4    | 2  | 0     | 1  | 1.70E-06 | 0.8266  | 1.70E-06 | 1.70E-06 |
| module_480 | 6.40E-16 | GO:0006412 | translation                                 | 576  | 13 | 0.79  | 1  | 6.40E-16 | 0.19391 | 6.40E-16 | 6.40E-16 |
| module_480 | 1.60E-07 | GO:0009058 | biosynthetic process                        | 2570 | 13 | 3.5   | 8  | 1.60E-07 | 0.38194 | 1        | 1        |
| module_480 | 4.00E-10 | GO:0009059 | macromolecule biosynthetic process          | 1610 | 13 | 2.2   | 4  | 4.00E-10 | 0.14067 | 1        | 1        |
| module_480 | 1.60E-10 | GO:0010467 | gene expression                             | 1498 | 13 | 2.04  | 2  | 1.60E-10 | 0.31593 | 1        | 1        |
| module_480 | 4.30E-08 | GO:0019538 | protein metabolic process                   | 2320 | 13 | 3.16  | 6  | 4.30E-08 | 0.24431 | 1        | 1        |
| module_480 | 3.80E-10 | GO:0034645 | cellular macromolecule biosynthetic proc... | 1605 | 13 | 2.19  | 3  | 3.80E-10 | 0.15373 | 1        | 1        |
| module_480 | 9.20E-06 | GO:0043170 | macromolecule metabolic process             | 3543 | 13 | 4.83  | 10 | 9.20E-06 | 0.71234 | 1        | 1        |
| module_480 | 9.50E-08 | GO:0044249 | cellular biosynthetic process               | 2467 | 13 | 3.36  | 7  | 9.50E-08 | 0.2941  | 1        | 1        |
| module_480 | 2.20E-06 | GO:0044260 | cellular macromolecule metabolic process    | 3156 | 13 | 4.3   | 9  | 2.20E-06 | 0.71313 | 1        | 1        |
| module_480 | 6.10E-09 | GO:0044267 | cellular protein metabolic process          | 1991 | 13 | 2.71  | 5  | 6.10E-09 | 0.26408 | 1        | 1        |
| module_482 | 3.10E-06 | GO:0006412 | translation                                 | 576  | 5  | 0.34  | 1  | 3.10E-06 | 0.16523 | 3.10E-06 | 3.10E-06 |
| module_485 | 5.60E-07 | GO:0007005 | mitochondrion organization                  | 27   | 3  | 0.02  | 1  | 5.60E-07 | 0.93307 | 5.60E-07 | 5.60E-07 |
| module_491 | 6.80E-06 | GO:0006418 | tRNA aminoacylation for protein translat... | 73   | 3  | 0.04  | 1  | 6.80E-06 | 0.71782 | 0.0255   | 6.80E-06 |
| module_491 | 6.80E-06 | GO:0043038 | amino acid activation                       | 73   | 3  | 0.04  | 2  | 6.80E-06 | 0.71782 | 0.0255   | 1        |
| module_491 | 6.80E-06 | GO:0043039 | tRNA aminoacylation                         | 73   | 3  | 0.04  | 3  | 6.80E-06 | 0.71782 | 0.0255   | 1        |
| module_502 | 8.90E-06 | GO:0046274 | lignin catabolic process                    | 13   | 2  | 0.01  | 1  | 8.90E-06 | 1       | 8.90E-06 | 8.90E-06 |
| module_502 | 8.90E-06 | GO:0046271 | phenylpropanoid catabolic process           | 13   | 2  | 0.01  | 2  | 8.90E-06 | 1       | 1        | 1        |
| module_521 | 1.70E-07 | GO:0010253 | UDP-rhamnose biosynthetic process           | 3    | 2  | 0     | 1  | 1.70E-07 | 1       | 1.70E-07 | 1.70E-07 |
| module_521 | 1.20E-06 | GO:0009226 | nucleotide-sugar biosynthetic process       | 7    | 2  | 0     | 5  | 1.20E-06 | 0.73186 | 1        | 1        |
| module_521 | 3.40E-07 | GO:0019299 | rhamnose metabolic process                  | 4    | 2  | 0     | 3  | 3.40E-07 | 1       | 1        | 1        |
| module_521 | 3.40E-07 | GO:0019300 | rhamnose biosynthetic process               | 4    | 2  | 0     | 4  | 3.40E-07 | 1       | 1        | 1        |
| module_521 | 9.70E-06 | GO:0019319 | hexose biosynthetic process                 | 19   | 2  | 0.01  | 6  | 9.70E-06 | 1       | 1        | 1        |
| module_521 | 1.70E-07 | GO:0033478 | UDP-rhamnose metabolic process              | 3    | 2  | 0     | 2  | 1.70E-07 | 1       | 1        | 1        |
| module_529 | 1.80E-16 | GO:0006412 | translation                                 | 576  | 21 | 2.24  | 1  | 1.80E-16 | 0.28574 | 1.70E-15 | 1.80E-16 |
| module_529 | 1.70E-09 | GO:0019538 | protein metabolic process                   | 2320 | 27 | 9.04  | 3  | 1.70E-09 | 0.42113 | 0.72521  | 0.71872  |
| module_529 | 2.80E-06 | GO:0009058 | biosynthetic process                        | 2570 | 24 | 10.01 | 8  | 2.80E-06 | 0.4189  | 0.98009  | 1        |
| module_529 | 7.20E-08 | GO:0009059 | macromolecule biosynthetic process          | 1610 | 21 | 6.27  | 6  | 7.20E-08 | 0.17444 | 1        | 1        |
| module_529 | 2.00E-08 | GO:0010467 | gene expression                             | 1498 | 21 | 5.84  | 4  | 2.00E-08 | 0.37571 | 1        | 1        |
| module_529 | 6.80E-08 | GO:0034645 | cellular macromolecule biosynthetic proc... | 1605 | 21 | 6.25  | 5  | 6.80E-08 | 0.18977 | 1        | 1        |
| module_529 | 1.30E-06 | GO:0044249 | cellular biosynthetic process               | 2467 | 24 | 9.61  | 7  | 1.30E-06 | 0.32831 | 0.97503  | 1        |
| module_529 | 8.00E-06 | GO:0044260 | cellular macromolecule metabolic process    | 3156 | 26 | 12.3  | 9  | 8.00E-06 | 0.76604 | 0.98674  | 1        |
| module_529 | 3.50E-10 | GO:0044267 | cellular protein metabolic process          | 1991 | 26 | 7.76  | 2  | 3.50E-10 | 0.4435  | 0.87066  | 1        |
| module_530 | 8.80E-06 | GO:0009644 | response to high light intensity            | 40   | 3  | 0.04  | 3  | 8.80E-06 | 0.99999 | 8.80E-06 | 8.80E-06 |
| module_530 | 3.00E-07 | GO:0009416 | response to light stimulus                  | 311  | 6  | 0.33  | 1  | 3.00E-07 | 0.77763 | 0.00093  | 0.00093  |
| module_530 | 3.30E-07 | GO:0009314 | response to radiation                       | 316  | 6  | 0.34  | 2  | 3.30E-07 | 0.82781 | 1        | 1        |
| module_538 | 2.80E-07 | GO:0051453 | regulation of intracellular pH              | 2    | 2  | 0     | 1  | 2.80E-07 | 1       | 2.80E-07 | 2.80E-07 |
| module_538 | 4.30E-06 | GO:0015743 | malate transport                            | 6    | 2  | 0     | 4  | 4.30E-06 | 1       | 4.30E-06 | 4.30E-06 |
| module_538 | 4.30E-06 | GO:0006835 | dicarboxylic acid transport                 | 6    | 2  | 0     | 5  | 4.30E-06 | 1       | 1        | 1        |
| module_538 | 4.30E-06 | GO:0015740 | C4-dicarboxylate transport                  | 6    | 2  | 0     | 6  | 4.30E-06 | 1       | 1        | 1        |
| module_538 | 1.70E-06 | GO:0030004 | cellular monovalent inorganic cation hom... | 4    | 2  | 0</   |    |          |         |          |          |

|            |          |            |                                             |      |    |       |    |          |         |          |          |
|------------|----------|------------|---------------------------------------------|------|----|-------|----|----------|---------|----------|----------|
| module_548 | 3.90E-06 | GO:0030244 | cellulose biosynthetic process              | 34   | 3  | 0.03  | 2  | 3.90E-06 | 0.99792 | 3.90E-06 | 3.90E-06 |
| module_548 | 7.00E-06 | GO:0009832 | plant-type cell wall biogenesis             | 41   | 3  | 0.04  | 4  | 7.00E-06 | 0.99998 | 1        | 1        |
| module_548 | 4.70E-06 | GO:0030243 | cellulose metabolic process                 | 36   | 3  | 0.04  | 3  | 4.70E-06 | 0.87439 | 1        | 1        |
| module_548 | 9.90E-06 | GO:0042546 | cell wall biogenesis                        | 46   | 3  | 0.04  | 5  | 9.90E-06 | 0.98974 | 1        | 1        |
| module_553 | 1.10E-15 | GO:0006268 | DNA unwinding involved in replication       | 11   | 7  | 0.04  | 3  | 1.10E-15 | 0.99999 | 1.10E-15 | 1.10E-15 |
| module_553 | 5.90E-15 | GO:0006270 | DNA-dependent DNA replication initiation    | 13   | 7  | 0.05  | 6  | 5.90E-15 | 0.85824 | 5.90E-15 | 5.90E-15 |
| module_553 | 4.10E-11 | GO:0008283 | cell proliferation                          | 38   | 7  | 0.13  | 9  | 4.10E-11 | 0.67536 | 4.10E-11 | 4.10E-11 |
| module_553 | 1.70E-17 | GO:0006259 | DNA metabolic process                       | 235  | 16 | 0.82  | 2  | 1.70E-17 | 0.84413 | 0.1104   | 8.90E-07 |
| module_553 | 1.20E-09 | GO:0006139 | nucleobase, nucleoside, nucleotide and n... | 1478 | 21 | 5.18  | 10 | 1.20E-09 | 0.77671 | 0.1045   | 1        |
| module_553 | 8.40E-18 | GO:0006260 | DNA replication                             | 74   | 12 | 0.26  | 1  | 8.40E-18 | 0.97428 | 1.60E-05 | 1        |
| module_553 | 9.80E-14 | GO:0006261 | DNA-dependent DNA replication               | 32   | 8  | 0.11  | 7  | 9.80E-14 | 0.91186 | 1        | 1        |
| module_553 | 1.90E-07 | GO:0006807 | nitrogen compound metabolic process         | 1949 | 21 | 6.83  | 13 | 1.90E-07 | 0.82725 | 0.2657   | 1        |
| module_553 | 1.60E-06 | GO:0009059 | macromolecule biosynthetic process          | 1610 | 18 | 5.65  | 15 | 1.60E-06 | 0.16895 | 0.2586   | 1        |
| module_553 | 2.70E-15 | GO:0032392 | DNA geometric change                        | 12   | 7  | 0.04  | 4  | 2.70E-15 | 0.89835 | 1        | 1        |
| module_553 | 2.70E-15 | GO:0032508 | DNA duplex unwinding                        | 12   | 7  | 0.04  | 5  | 2.70E-15 | 0.89835 | 1        | 1        |
| module_553 | 1.00E-07 | GO:0034641 | cellular nitrogen compound metabolic pro... | 1883 | 21 | 6.6   | 12 | 1.00E-07 | 0.89048 | 0.2396   | 1        |
| module_553 | 1.50E-06 | GO:0034645 | cellular macromolecule biosynthetic proc... | 1605 | 18 | 5.63  | 14 | 1.50E-06 | 0.18395 | 0.2563   | 1        |
| module_553 | 4.20E-06 | GO:0043170 | macromolecule metabolic process             | 3543 | 26 | 12.42 | 17 | 4.20E-06 | 0.83982 | 0.0918   | 1        |
| module_553 | 1.90E-06 | GO:0044260 | cellular macromolecule metabolic process    | 3156 | 25 | 11.07 | 16 | 1.90E-06 | 0.77521 | 0.1036   | 1        |
| module_553 | 4.50E-08 | GO:0071103 | DNA conformation change                     | 100  | 7  | 0.35  | 11 | 4.50E-08 | 0.17034 | 1        | 1        |
| module_553 | 3.00E-11 | GO:0090304 | nucleic acid metabolic process              | 1220 | 21 | 4.28  | 8  | 3.00E-11 | 0.80536 | 0.0481   | 1        |
| module_554 | 3.00E-07 | GO:0006260 | DNA replication                             | 74   | 4  | 0.06  | 1  | 3.00E-07 | 0.80891 | 1.20E-05 | 7.20E-06 |
| module_557 | 5.10E-06 | GO:0030418 | nicotianamine biosynthetic process          | 4    | 2  | 0     | 1  | 5.10E-06 | 1       | 5.10E-06 | 5.10E-06 |
| module_557 | 5.10E-06 | GO:0030417 | nicotianamine metabolic process             | 4    | 2  | 0     | 2  | 5.10E-06 | 1       | 1        | 1        |
| module_56  | 1.10E-23 | GO:0006334 | nucleosome assembly                         | 81   | 12 | 0.12  | 1  | 1.10E-23 | 0.94388 | 1.10E-23 | 1.10E-23 |
| module_56  | 1.50E-23 | GO:0006323 | DNA packaging                               | 83   | 12 | 0.12  | 4  | 1.50E-23 | 0.91859 | 1        | 1        |
| module_56  | 2.40E-20 | GO:0006325 | chromatin organization                      | 149  | 12 | 0.22  | 8  | 2.40E-20 | 0.83113 | 1        | 1        |
| module_56  | 2.70E-22 | GO:0006333 | chromatin assembly or disassembly           | 104  | 12 | 0.15  | 7  | 2.70E-22 | 0.61464 | 1        | 1        |
| module_56  | 9.60E-15 | GO:0006996 | organelle organization                      | 428  | 12 | 0.63  | 15 | 9.60E-15 | 0.4766  | 1        | 1        |
| module_56  | 9.50E-12 | GO:0016043 | cellular component organization             | 762  | 12 | 1.11  | 17 | 9.50E-12 | 0.33492 | 1        | 1        |
| module_56  | 1.30E-16 | GO:0022607 | cellular component assembly                 | 300  | 12 | 0.44  | 14 | 1.30E-16 | 0.56129 | 1        | 1        |
| module_56  | 1.30E-23 | GO:0031497 | chromatin assembly                          | 82   | 12 | 0.12  | 3  | 1.30E-23 | 0.96542 | 1        | 1        |
| module_56  | 1.40E-18 | GO:0034621 | cellular macromolecular complex subunit ... | 207  | 12 | 0.3   | 11 | 1.40E-18 | 0.93125 | 1        | 1        |
| module_56  | 6.00E-19 | GO:0034622 | cellular macromolecular complex assembly    | 193  | 12 | 0.28  | 10 | 6.00E-19 | 0.80441 | 1        | 1        |
| module_56  | 1.10E-23 | GO:0034728 | nucleosome organization                     | 81   | 12 | 0.12  | 2  | 1.10E-23 | 0.94388 | 1        | 1        |
| module_56  | 8.30E-17 | GO:0043933 | macromolecular complex subunit organizat... | 289  | 12 | 0.42  | 13 | 8.30E-17 | 0.71852 | 1        | 1        |
| module_56  | 5.70E-14 | GO:0044085 | cellular component biogenesis               | 496  | 12 | 0.72  | 16 | 5.70E-14 | 0.81462 | 1        | 1        |
| module_56  | 1.20E-19 | GO:0051276 | chromosome organization                     | 169  | 12 | 0.25  | 9  | 1.20E-19 | 0.81188 | 1        | 1        |
| module_56  | 4.60E-17 | GO:0065003 | macromolecular complex assembly             | 275  | 12 | 0.4   | 12 | 4.60E-17 | 0.54295 | 1        | 1        |
| module_56  | 1.50E-23 | GO:0065004 | protein-DNA complex assembly                | 83   | 12 | 0.12  | 5  | 1.50E-23 | 0.9818  | 1        | 1        |
| module_56  | 1.60E-22 | GO:0071103 | DNA conformation change                     | 100  | 12 | 0.15  | 6  | 1.60E-22 | 0.8012  | 1        | 1        |
| module_563 | 3.90E-06 | GO:0030244 | cellulose biosynthetic process              | 34   | 3  | 0.03  | 4  | 3.90E-06 | 1       | 3.90E-06 | 3.90E-06 |
| module_563 | 7.00E-06 | GO:0009832 | plant-type cell wall biogenesis             | 41   | 3  | 0.04  | 6  | 7.00E-06 | 1       | 1        | 7.00E-06 |
| module_563 | 6.60E-07 | GO:0000271 | polysaccharide biosynthetic process         | 79   | 4  | 0.08  | 2  | 6.60E-07 | 0.98999 | 1        | 1        |
| module_563 | 7.30E-06 | GO:0005976 | polysaccharide metabolic process            | 144  | 4  | 0.14  | 7  | 7.30E-06 | 0.9694  | 1        | 1        |
| module_563 | 4.70E-06 | GO:0030243 | cellulose metabolic process                 | 36   | 3  | 0.04  | 5  | 4.70E-06 | 0.9734  | 1        | 1        |
| module_563 | 5.90E-07 | GO:0033692 | cellular polysaccharide biosynthetic pro... | 77   | 4  | 0.07  | 1  | 5.90E-07 | 0.9806  | 1        | 1        |
| module_563 | 7.30E-06 | GO:0034637 | cellular carbohydrate biosynthetic proce... | 144  | 4  | 0.14  | 8  | 7.30E-06 | 0.97784 | 1        | 1        |
| module_563 | 9.90E-06 | GO:0042546 | cell wall biogenesis                        | 46   | 3  | 0.04  | 9  | 9.90E-06 | 1       | 1        | 1        |
| module_563 | 2.10E-06 | GO:0044264 | cellular polysaccharide metabolic proces... | 106  | 4  | 0.1   | 3  | 2.10E-06 | 0.95604 | 1        | 1        |
| module_567 | 1.70E-10 | GO:0043687 | post-translational protein modification     | 847  | 9  | 0.74  | 1  | 1.70E-10 | 0.36184 | 0.0246   | 1.70E-10 |
| module_567 | 1.60E-09 | GO:0006464 | protein modification process                | 1086 | 9  | 0.95  | 3  | 1.60E-09 | 0.35107 | 0.0494   | 1        |
| module_567 | 1.30E-09 | GO:0006468 | protein amino acid phosphorylation          | 609  | 8  | 0.53  | 2  | 1.30E-09 | 0.56823 | 1.30E-09 | 1        |
| module_567 | 8.60E-09 | GO:0006793 | phosphorus metabolic process                | 775  | 8  | 0.68  | 7  | 8.60E-09 | 0.31382 | 1        | 1        |
| module_567 | 8.50E-09 | GO:0006796 | phosphate metabolic process                 | 774  | 8  | 0.68  | 6  | 8.50E-09 | 0.32335 | 1        | 1        |
| module_567 | 3.50E-09 | GO:0016310 | phosphorylation                             | 693  | 8  | 0.61  | 5  | 3.50E-09 | 0.5597  | 1        | 1        |
| module_567 | 1.50E-06 | GO:0019538 | protein metabolic process                   | 2320 | 9  | 2.03  | 9  | 1.50E-06 | 0.2802  | 0.1304   | 1        |
| module_567 | 2.50E-09 | GO:0043412 | macromolecule modification                  | 1141 | 9  | 1     | 4  | 2.50E-09 | 0.39711 | 0.0551   | 1        |
| module_567 | 3.80E-07 | GO:0044267 | cellular protein metabolic process          | 1991 | 9  | 1.75  | 8  | 3.80E-07 | 0.30071 | 0.1431   | 1        |
| module_569 | 1.80E-11 | GO:0006412 | translation                                 | 576  | 11 | 0.84  | 1  | 1.80E-11 | 0.28768 | 1.80E-11 | 1.80E-11 |
| module_569 | 1.00E-06 | GO:0009059 | macromolecule biosynthetic process          | 1610 | 11 | 2.35  | 6  | 1.00E-06 | 0.18005 | 1        | 1        |
| module_569 | 4.80E-07 | GO:0010467 | gene expression                             | 1498 | 11 | 2.19  | 3  | 4.80E-07 | 0.38433 | 1        | 1        |
| module_569 | 2.60E-07 | GO:0019538 | protein metabolic process                   | 2320 | 13 | 3.39  | 2  | 2.60E-07 | 0.3039  | 0.151    | 1        |
| module_569 | 9.80E-07 | GO:0034645 | cellular macromolecule biosynthetic proc... | 1605 | 11 | 2.34  | 5  | 9.80E-07 | 0.19571 | 1        | 1        |
| module_569 | 3.40E-06 | GO:0043170 | macromolecule metabolic process             | 3543 | 14 | 5.18  | 7  | 3.40E-06 | 0.75931 | 0.088    | 1        |
| module_569 | 7.00E-07 | GO:0044267 | cellular protein metabolic process          | 1991 | 12 | 2.91  | 4  | 7.00E-07 | 0.30595 | 0.468    | 1        |
| module_581 | 6.50E-07 | GO:0006468 | protein amino acid phosphorylation          | 609  | 8  | 0.89  | 1  | 6.50E-07 | 0.5503  | 6.50E-07 | 6.50E-07 |
| module_581 | 4.10E-06 | GO:0006793 | phosphorus metabolic process                | 775  | 8  | 1.13  | 4  | 4.10E-06 | 0.29789 | 1        | 1        |
| module_581 | 4.00E-06 | GO:0006796 | phosphate metabolic process                 | 774  | 8  | 1.13  | 3  | 4.00E-06 | 0.30715 | 1        | 1        |
| module_581 | 1.70E-06 | GO:0016310 | phosphorylation                             | 693  | 8  | 1.01  | 2  | 1.70E-06 | 0.54054 | 1        | 1        |
| module_581 | 7.90E-06 | GO:0043687 | post-translational protein modification     | 847  | 8  | 1.24  | 5  | 7.90E-06 | 0.34376 | 1        | 1        |
| module_589 | 7.70E-08 | GO:0019252 | starch biosynthetic process                 | 11   | 3  | 0.01  | 1  | 7.70E-08 | 0.5158  | 0.0041   | 7.70E-08 |
| module_589 | 6.80E-07 | GO:0010444 | guard mother cell differentiation           | 2    | 2  | 0     | 2  | 6.80E-07 | 1       | 6.80E-07 | 6.80E-07 |
| module_589 | 9.30E-07 | GO:0005982 | starch metabolic process                    | 24   | 3  | 0.02  | 3  | 9.30E-07 | 0.80409 | 1        | 1        |
| module_589 | 6.80E-06 | GO:0010021 | amylopectin biosynthetic process            | 5    | 2  | 0     | 5  | 6.80E-06 | 0.90361 | 6.80E-06 | 1        |
| module_589 | 4.10E-06 | GO:0010440 | stomatal lineage progression                | 4    | 2  | 0     | 4  | 4.10E-06 | 0.37844 | 1        | 1        |
| module_592 | 4.30E-08 | GO:0006468 | protein amino acid phosphorylation          | 609  | 6  | 0.36  | 1  | 4.30E-08 | 0.34884 | 4.30E-08 | 4.30E-08 |
| module_592 | 1.40E-06 | GO:0006464 | protein modification process                | 1086 | 6  | 0.63  | 6  | 1.40E-06 | 0.22243 | 1        | 1        |
| module_592 | 1.80E-07 | GO:0006793 | phosphorus metabolic process                | 775  | 6  | 0.45  | 4  | 1.80E-07 | 0.20036 | 1        | 1        |
| module_592 | 1.80E-07 | GO:0006796 | phosphate metabolic process                 | 774  | 6  | 0.45  | 3  | 1.80E-07 | 0.20748 | 1        | 1        |
| module_592 | 9.30E-08 | GO:0016310 | phosphorylation                             | 693  | 6  | 0.4   | 2  | 9.30E-08 | 0.39364 | 1        | 1        |
| module_592 | 1.90E-06 | GO:0043412 | macromolecule modification                  | 1141 | 6  | 0.67  | 7  | 1.90E-06 | 0.26137 | 1        | 1        |
| module_592 | 3.10E-07 | GO:0043687 | post-translational protein modification     | 847  | 6  | 0.49  | 5  | 3.10E-07 | 0.21438 | 1        | 1        |
| module_598 | 2.00E-13 | GO:0006334 | nucleosome assembly                         | 81   | 6  | 0.05  | 1  | 2.00E-13 | 0.35303 | 2.00E-13 | 2.00E-13 |
| module_598 | 2.30E-13 | GO:0006323 | DNA packaging                               | 83   | 6  | 0.05  | 4  | 2.30E-13 | 0.32381 | 1        | 1        |
| module_598 | 8.40E-12 | GO:0006325 | chromatin organization                      | 149  | 6  | 0.09  | 8  | 8.40E-12 | 0.36659 | 1        | 1        |
| module_598 | 9.30E-13 | GO:0006333 | chromatin assembly or disassembly           | 104  | 6  | 0.06  | 7  | 9.30E-13 | 0.147   | 1        | 1        |
| module_598 | 5.10E-09 | GO:0006996 | organelle organization                      | 428  | 6  | 0.25  | 15 | 5.10E-09 | 0.24356 | 1        | 1        |
| module_598 | 1.60E-07 | GO:0016043 | cellular component organization             | 762  | 6  | 0.45  | 17 | 1.60E-07 | 0.17062 | 1        | 1        |
| module_598 | 5.90E-10 | GO:0022607 | cellular component assembly                 | 300  | 6  | 0.18  | 14 | 5.90E-10 | 0.21738 | 1        | 1        |
| module_598 | 2.20E-13 | GO:0031497 | chromatin assembly                          | 82   | 6  | 0.05  | 3  | 2.20E-13 | 0.39571 | 1        | 1        |
| module_598 | 6.30E-11 | GO:0034621 | cellular macromolecular complex subunit ... | 207  | 6  | 0.12  | 11 | 6.30E-11 | 0.48995 | 1        | 1        |
| module_598 | 4.10E-11 | GO:0034622 | cellular macromolecular complex assembly    | 193  | 6  | 0.11  | 10 | 4.10E-11 | 0.32116 | 1        | 1        |
| module_598 | 2.00E-13 | GO:0034728 | nucleosome organization                     | 81   | 6  | 0.05  | 2  | 2.00E-13 | 0.35303 | 1        | 1        |
| module_598 | 4.70E-10 | GO:0043933 | macromolecular complex subunit organizat... | 289  | 6  | 0.17  | 13 | 4.70E-10 | 0.32519 | 1        | 1        |
| module_598 | 1.20E-08 | GO:0044085 | cellular component biogenesis               | 496  | 6  | 0.29  | 16 | 1.20E-08 | 0.51463 | 1        | 1        |
| module_598 | 1.80E-11 | GO:0051276 | chromosome organization                     | 169  | 6  | 0.1   | 9  | 1.80E-11 | 0.3712  | 1        | 1        |
| module_598 | 3.50E-10 | GO:0065003 | macromolecular complex assembly             | 275  | 6  | 0.16  | 12 | 3.50E-10 | 0.19462 | 1        | 1        |
| module_598 | 2.30E-13 | GO:0065004 | protein-DNA complex assembly                | 83   | 6  | 0.05  | 5  | 2.30E-13 | 0.44005 | 1        | 1        |
| module_598 | 7.30E-13 | GO:0071103 | DNA conformation change                     | 100  | 6  | 0.06  | 6  | 7.30E-13 | 0.25339 | 1        | 1        |
| module_603 | 1.20E-06 | GO:0030244 | cellulose biosynthetic process              | 34   | 3  | 0.02  | 1  | 1.20E-06 | 0.99189 | 1.20E-06 | 1.20E-06 |
| module_603 | 6.50E-06 | GO:0009250 | glucan biosynthetic process                 | 60   | 3  | 0.04  | 3  | 6.50E-06 | 0.84311 | 1        | 1        |
| module_603 | 1.40E-06 |            |                                             |      |    |       |    |          |         |          |          |

|           |          |            |                                             |     |    |      |    |          |         |          |          |
|-----------|----------|------------|---------------------------------------------|-----|----|------|----|----------|---------|----------|----------|
| module_72 | 2.90E-07 | GO:0005975 | carbohydrate metabolic process              | 645 | 11 | 1.7  | 1  | 2.90E-07 | 0.93111 | 2.90E-07 | 5.90E-06 |
| module_72 | 1.10E-06 | GO:0009739 | response to gibberellin stimulus            | 31  | 4  | 0.08 | 2  | 1.10E-06 | 0.96192 | 5.60E-05 | 3.60E-05 |
| module_82 | 4.10E-07 | GO:0019915 | lipid storage                               | 8   | 3  | 0.02 | 1  | 4.10E-07 | 0.09963 | 4.10E-07 | 4.10E-07 |
| module_86 | 3.80E-07 | GO:0006119 | oxidative phosphorylation                   | 56  | 4  | 0.07 | 1  | 3.80E-07 | 0.96229 | 1        | 0.00069  |
| module_94 | 2.50E-09 | GO:0005986 | sucrose biosynthetic process                | 15  | 3  | 0    | 1  | 2.50E-09 | 0.39479 | 2.50E-09 | 2.50E-09 |
| module_94 | 1.60E-07 | GO:0005984 | disaccharide metabolic process              | 57  | 3  | 0.02 | 6  | 1.60E-07 | 0.76379 | 1        | 1        |
| module_94 | 5.10E-08 | GO:0005985 | sucrose metabolic process                   | 39  | 3  | 0.01 | 5  | 5.10E-08 | 0.77869 | 1        | 1        |
| module_94 | 2.10E-07 | GO:0009311 | oligosaccharide metabolic process           | 62  | 3  | 0.02 | 8  | 2.10E-07 | 0.61302 | 1        | 1        |
| module_94 | 1.60E-08 | GO:0009312 | oligosaccharide biosynthetic process        | 27  | 3  | 0.01 | 2  | 1.60E-08 | 0.71085 | 1        | 1        |
| module_94 | 5.60E-06 | GO:0016051 | carbohydrate biosynthetic process           | 183 | 3  | 0.05 | 10 | 5.60E-06 | 0.8978  | 1        | 1        |
| module_94 | 2.00E-07 | GO:0016137 | glycoside metabolic process                 | 61  | 3  | 0.02 | 7  | 2.00E-07 | 0.68744 | 1        | 1        |
| module_94 | 4.00E-08 | GO:0016138 | glycoside biosynthetic process              | 36  | 3  | 0.01 | 4  | 4.00E-08 | 0.66059 | 1        | 1        |
| module_94 | 2.70E-06 | GO:0034637 | cellular carbohydrate biosynthetic proce... | 144 | 3  | 0.04 | 9  | 2.70E-06 | 0.9354  | 1        | 1        |
| module_94 | 1.60E-08 | GO:0046351 | disaccharide biosynthetic process           | 27  | 3  | 0.01 | 3  | 1.60E-08 | 0.71085 | 1        | 1        |
