# Supplementary material for: Global Landscape of a Co-Expressed Gene Network in Barley and its Application to Gene Discovery in Triticeae Crops
Source: PubMed Central journal article supplement — Plant Cell Physiol. 2011 Mar 24;52(5):785–803. doi: 10.1093/pcp/pcr035 (PMC3093127; doi:10.1093/pcp/pcr035), 2011-03-24
Supplement: supp_pcr035_pcp-2011-e-00060-File006.pdf [file supp_pcr035_pcp-2011-e-00060-File006.pdf]

Table S2. GO Slim annotation of each module.

| GO Slim ID and assigned modules | GO Slim Term and GO IDs associated to GO Slim T     | No. GO Terms and GO Terms significantly enriched                      |
|---------------------------------|-----------------------------------------------------|-----------------------------------------------------------------------|
| Slim id: GO:0000003             | reproduction                                        | 6                                                                     |
| module_263                      | GO:0048700                                          | acquisition of desiccation tolerance                                  |
| module_293                      | GO:0048481                                          | ovule development                                                     |
| module_293                      | GO:0048437                                          | floral organ development                                              |
| module_293                      | GO:0048438                                          | floral whorl development                                              |
| module_293                      | GO:0048440                                          | carpel development                                                    |
| module_293                      | GO:0048467                                          | gynoecium development                                                 |
| Slim id: GO:0005975             | carbohydrate metabolic process                      | 50                                                                    |
| module_170                      | GO:0019253                                          | reductive pentose-phosphate cycle                                     |
| module_170                      | GO:0019685                                          | photosynthesis, dark reaction                                         |
| module_272                      | GO:0006096                                          | glycolysis                                                            |
| module_355                      | GO:0010289                                          | homogalacturonan biosynthetic process                                 |
| module_355                      | GO:0000271                                          | polysaccharide biosynthetic process                                   |
| module_355                      | GO:0005976                                          | polysaccharide metabolic process                                      |
| module_355                      | GO:0016051                                          | carbohydrate biosynthetic process                                     |
| module_355                      | GO:0033692                                          | cellular polysaccharide biosynthetic process                          |
| module_355                      | GO:0034637                                          | cellular carbohydrate biosynthetic process                            |
| module_355                      | GO:0044264                                          | cellular polysaccharide metabolic process                             |
| module_355                      | GO:0045488                                          | pectin metabolic process                                              |
| module_355                      | GO:0045489                                          | pectin biosynthetic process                                           |
| module_413                      | GO:0005998                                          | xylulose catabolic process                                            |
| module_413                      | GO:0005996                                          | monosaccharide metabolic process                                      |
| module_413                      | GO:0005997                                          | xylulose metabolic process                                            |
| module_413                      | GO:0016052                                          | carbohydrate catabolic process                                        |
| module_413                      | GO:0019323                                          | pentose catabolic process                                             |
| module_413                      | GO:0044275                                          | cellular carbohydrate catabolic process                               |
| module_413                      | GO:0046365                                          | monosaccharide catabolic process                                      |
| module_521                      | GO:0010253                                          | UDP-rhamnose biosynthetic process                                     |
| module_521                      | GO:0019299                                          | rhamnose metabolic process                                            |
| module_521                      | GO:0019300                                          | rhamnose biosynthetic process                                         |
| module_521                      | GO:0019319                                          | hexose biosynthetic process                                           |
| module_521                      | GO:0033478                                          | UDP-rhamnose metabolic process                                        |
| module_548                      | GO:0030244                                          | cellulose biosynthetic process                                        |
| module_548                      | GO:0030243                                          | cellulose metabolic process                                           |
| module_563                      | GO:0030244                                          | cellulose biosynthetic process                                        |
| module_563                      | GO:0000271                                          | polysaccharide biosynthetic process                                   |
| module_563                      | GO:0005976                                          | polysaccharide metabolic process                                      |
| module_563                      | GO:0030243                                          | cellulose metabolic process                                           |
| module_563                      | GO:0033692                                          | cellular polysaccharide biosynthetic process                          |
| module_563                      | GO:0034637                                          | cellular carbohydrate biosynthetic process                            |
| module_563                      | GO:0044264                                          | cellular polysaccharide metabolic process                             |
| module_589                      | GO:0019252                                          | starch biosynthetic process                                           |
| module_589                      | GO:0005982                                          | starch metabolic process                                              |
| module_589                      | GO:0010021                                          | amylopectin biosynthetic process                                      |
| module_603                      | GO:0030244                                          | cellulose biosynthetic process                                        |
| module_603                      | GO:0009250                                          | glucan biosynthetic process                                           |
| module_603                      | GO:0030243                                          | cellulose metabolic process                                           |
| module_72                       | GO:0005975                                          | carbohydrate metabolic process                                        |
| module_94                       | GO:0005986                                          | sucrose biosynthetic process                                          |
| module_94                       | GO:0005984                                          | disaccharide metabolic process                                        |
| module_94                       | GO:0005985                                          | sucrose metabolic process                                             |
| module_94                       | GO:0009311                                          | oligosaccharide metabolic process                                     |
| module_94                       | GO:0009312                                          | oligosaccharide biosynthetic process                                  |
| module_94                       | GO:0016051                                          | carbohydrate biosynthetic process                                     |
| module_94                       | GO:0016137                                          | glycoside metabolic process                                           |
| module_94                       | GO:0016138                                          | glycoside biosynthetic process                                        |
| module_94                       | GO:0034637                                          | cellular carbohydrate biosynthetic process                            |
| module_94                       | GO:0046351                                          | disaccharide biosynthetic process                                     |
| Slim id: GO:0006091             | generation of precursor metabolites and energy      | 21                                                                    |
| module_118                      | GO:0042550                                          | photosystem I stabilization                                           |
| module_118                      | GO:0042548                                          | regulation of photosynthesis, light reaction                          |
| module_118                      | GO:0043467                                          | regulation of generation of precursor metabolites and energy          |
| module_180                      | GO:0015980                                          | energy derivation by oxidation of organic compounds                   |
| module_180                      | GO:0045333                                          | cellular respiration                                                  |
| module_272                      | GO:0006096                                          | glycolysis                                                            |
| module_303                      | GO:0009765                                          | photosynthesis, light harvesting                                      |
| module_303                      | GO:0006091                                          | generation of precursor metabolites and energy                        |
| module_303                      | GO:0009768                                          | photosynthesis, light harvesting in photosystem I                     |
| module_303                      | GO:0019684                                          | photosynthesis, light reaction                                        |
| module_317                      | GO:0009769                                          | photosynthesis, light harvesting in photosystem II                    |
| module_317                      | GO:0009765                                          | photosynthesis, light harvesting                                      |
| module_317                      | GO:0006091                                          | generation of precursor metabolites and energy                        |
| module_317                      | GO:0019684                                          | photosynthesis, light reaction                                        |
| module_323                      | GO:0009767                                          | photosynthetic electron transport chain                               |
| module_323                      | GO:0006091                                          | generation of precursor metabolites and energy                        |
| module_323                      | GO:0019684                                          | photosynthesis, light reaction                                        |
| module_323                      | GO:0022900                                          | electron transport chain                                              |
| module_429                      | GO:0009765                                          | photosynthesis, light harvesting                                      |
| module_429                      | GO:0019684                                          | photosynthesis, light reaction                                        |
| module_86                       | GO:0006119                                          | oxidative phosphorylation                                             |
| Slim id: GO:0006139             | nucleobase, nucleoside, nucleotide and nucleic acid | 26                                                                    |
| module_12                       | GO:0006556                                          | S-adenosylmethionine biosynthetic process                             |
| module_12                       | GO:0009119                                          | ribonucleoside metabolic process                                      |
| module_12                       | GO:0042278                                          | purine nucleoside metabolic process                                   |
| module_12                       | GO:0046128                                          | purine ribonucleoside metabolic process                               |
| module_12                       | GO:0046500                                          | S-adenosylmethionine metabolic process                                |
| module_222                      | GO:0006364                                          | rRNA processing                                                       |
| module_222                      | GO:0006396                                          | RNA processing                                                        |
| module_222                      | GO:0016072                                          | rRNA metabolic process                                                |
| module_222                      | GO:0034470                                          | ncRNA processing                                                      |
| module_222                      | GO:0034660                                          | ncRNA metabolic process                                               |
| module_266                      | GO:0006355                                          | regulation of transcription, DNA-dependent                            |
| module_266                      | GO:0051252                                          | regulation of RNA metabolic process                                   |
| module_293                      | GO:0006418                                          | tRNA aminoacylation for protein translation                           |
| module_293                      | GO:0006399                                          | tRNA metabolic process                                                |
| module_293                      | GO:0006431                                          | methionyl-tRNA aminoacylation                                         |
| module_293                      | GO:0034660                                          | ncRNA metabolic process                                               |
| module_293                      | GO:0043039                                          | tRNA aminoacylation                                                   |
| module_371                      | GO:0016070                                          | RNA metabolic process                                                 |
| module_473                      | GO:0006396                                          | RNA processing                                                        |
| module_491                      | GO:0006418                                          | tRNA aminoacylation for protein translation                           |
| module_491                      | GO:0043039                                          | tRNA aminoacylation                                                   |
| module_521                      | GO:0010253                                          | UDP-rhamnose biosynthetic process                                     |
| module_521                      | GO:0009226                                          | nucleotide-sugar biosynthetic process                                 |
| module_521                      | GO:0033478                                          | UDP-rhamnose metabolic process                                        |
| module_553                      | GO:0006139                                          | nucleobase, nucleoside, nucleotide and nucleic acid metabolic process |
| module_553                      | GO:0090304                                          | nucleic acid metabolic process                                        |
| Slim id: GO:0006259             | DNA metabolic process                               | 7                                                                     |
| module_447                      | GO:0015074                                          | DNA integration                                                       |
| module_553                      | GO:0006268                                          | DNA unwinding involved in replication                                 |
| module_553                      | GO:0006270                                          | DNA-dependent DNA replication initiation                              |

|                     |                                                      |                                                       |    |
|---------------------|------------------------------------------------------|-------------------------------------------------------|----|
| module_553          | GO:0006259                                           | DNA metabolic process                                 |    |
| module_553          | GO:0006260                                           | DNA replication                                       |    |
| module_553          | GO:0006261                                           | DNA-dependent DNA replication                         |    |
| module_554          | GO:0006260                                           | DNA replication                                       |    |
| Slim id: GO:0006350 | transcription                                        |                                                       | 1  |
| module_266          | GO:0006355                                           | regulation of transcription, DNA-dependent            |    |
| Slim id: GO:0006412 | translation                                          |                                                       | 18 |
| module_113          | GO:0006413                                           | translational initiation                              |    |
| module_237          | GO:0006412                                           | translation                                           |    |
| module_285          | GO:0006412                                           | translation                                           |    |
| module_290          | GO:0006412                                           | translation                                           |    |
| module_290          | GO:0006414                                           | translational elongation                              |    |
| module_293          | GO:0006418                                           | tRNA aminoacylation for protein translation           |    |
| module_293          | GO:0006431                                           | methionyl-tRNA aminoacylation                         |    |
| module_313          | GO:0006412                                           | translation                                           |    |
| module_380          | GO:0006412                                           | translation                                           |    |
| module_41           | GO:0006412                                           | translation                                           |    |
| module_410          | GO:0006412                                           | translation                                           |    |
| module_414          | GO:0006412                                           | translation                                           |    |
| module_443          | GO:0006412                                           | translation                                           |    |
| module_480          | GO:0006412                                           | translation                                           |    |
| module_482          | GO:0006412                                           | translation                                           |    |
| module_491          | GO:0006418                                           | tRNA aminoacylation for protein translation           |    |
| module_529          | GO:0006412                                           | translation                                           |    |
| module_569          | GO:0006412                                           | translation                                           |    |
| Slim id: GO:0006464 | protein modification process                         |                                                       | 18 |
| module_141          | GO:0006468                                           | protein amino acid phosphorylation                    |    |
| module_271          | GO:0018401                                           | peptidyl-proline hydroxylation to 4-hydroxy-L-proline |    |
| module_271          | GO:0018208                                           | peptidyl-proline modification                         |    |
| module_271          | GO:0019511                                           | peptidyl-proline hydroxylation                        |    |
| module_391          | GO:0006468                                           | protein amino acid phosphorylation                    |    |
| module_403          | GO:0017006                                           | protein-tetrapyrrole linkage                          |    |
| module_403          | GO:0018298                                           | protein-chromophore linkage                           |    |
| module_404          | GO:0006468                                           | protein amino acid phosphorylation                    |    |
| module_404          | GO:0006464                                           | protein modification process                          |    |
| module_404          | GO:0043687                                           | post-translational protein modification               |    |
| module_567          | GO:0043687                                           | post-translational protein modification               |    |
| module_567          | GO:0006464                                           | protein modification process                          |    |
| module_567          | GO:0006468                                           | protein amino acid phosphorylation                    |    |
| module_581          | GO:0006468                                           | protein amino acid phosphorylation                    |    |
| module_581          | GO:0043687                                           | post-translational protein modification               |    |
| module_592          | GO:0006468                                           | protein amino acid phosphorylation                    |    |
| module_592          | GO:0006464                                           | protein modification process                          |    |
| module_592          | GO:0043687                                           | post-translational protein modification               |    |
| Slim id: GO:0006519 | cellular amino acid and derivative metabolic process |                                                       | 39 |
| module_12           | GO:0006556                                           | S-adenosylmethionine biosynthetic process             |    |
| module_12           | GO:0000097                                           | sulfur amino acid biosynthetic process                |    |
| module_12           | GO:0046500                                           | S-adenosylmethionine metabolic process                |    |
| module_142          | GO:0006656                                           | phosphatidylcholine biosynthetic process              |    |
| module_142          | GO:0006576                                           | cellular biogenic amine metabolic process             |    |
| module_142          | GO:0042439                                           | ethanolamine and derivative metabolic process         |    |
| module_142          | GO:0046470                                           | phosphatidylcholine metabolic process                 |    |
| module_236          | GO:0009698                                           | phenylpropanoid metabolic process                     |    |
| module_236          | GO:0006519                                           | cellular amino acid and derivative metabolic process  |    |
| module_236          | GO:0006575                                           | cellular amino acid derivative metabolic process      |    |
| module_236          | GO:0009699                                           | phenylpropanoid biosynthetic process                  |    |
| module_236          | GO:0009812                                           | flavonoid metabolic process                           |    |
| module_236          | GO:0009813                                           | flavonoid biosynthetic process                        |    |
| module_236          | GO:0042398                                           | cellular amino acid derivative biosynthetic process   |    |
| module_249          | GO:0006558                                           | L-phenylalanine metabolic process                     |    |
| module_249          | GO:0009698                                           | phenylpropanoid metabolic process                     |    |
| module_249          | GO:0006519                                           | cellular amino acid and derivative metabolic process  |    |
| module_249          | GO:0009072                                           | aromatic amino acid family metabolic process          |    |
| module_271          | GO:0018401                                           | peptidyl-proline hydroxylation to 4-hydroxy-L-proline |    |
| module_271          | GO:0019471                                           | 4-hydroxyproline metabolic process                    |    |
| module_293          | GO:0006418                                           | tRNA aminoacylation for protein translation           |    |
| module_293          | GO:0006431                                           | methionyl-tRNA aminoacylation                         |    |
| module_293          | GO:0006520                                           | cellular amino acid metabolic process                 |    |
| module_293          | GO:0043038                                           | amino acid activation                                 |    |
| module_293          | GO:0043039                                           | tRNA aminoacylation                                   |    |
| module_296          | GO:0006552                                           | leucine catabolic process                             |    |
| module_413          | GO:0006573                                           | valine metabolic process                              |    |
| module_419          | GO:0051555                                           | flavonol biosynthetic process                         |    |
| module_419          | GO:0051552                                           | flavone metabolic process                             |    |
| module_419          | GO:0051553                                           | flavone biosynthetic process                          |    |
| module_419          | GO:0051554                                           | flavonol metabolic process                            |    |
| module_491          | GO:0006418                                           | tRNA aminoacylation for protein translation           |    |
| module_491          | GO:0043038                                           | amino acid activation                                 |    |
| module_491          | GO:0043039                                           | tRNA aminoacylation                                   |    |
| module_502          | GO:0046274                                           | lignin catabolic process                              |    |
| module_502          | GO:0046271                                           | phenylpropanoid catabolic process                     |    |
| module_540          | GO:0006552                                           | leucine catabolic process                             |    |
| module_557          | GO:0030418                                           | nicotianamine biosynthetic process                    |    |
| module_557          | GO:0030417                                           | nicotianamine metabolic process                       |    |
| Slim id: GO:0006629 | lipid metabolic process                              |                                                       | 28 |
| module_118          | GO:0019375                                           | galactolipid biosynthetic process                     |    |
| module_118          | GO:0006643                                           | membrane lipid metabolic process                      |    |
| module_118          | GO:0006664                                           | glycolipid metabolic process                          |    |
| module_118          | GO:0009247                                           | glycolipid biosynthetic process                       |    |
| module_118          | GO:0019374                                           | galactolipid metabolic process                        |    |
| module_118          | GO:0046467                                           | membrane lipid biosynthetic process                   |    |
| module_142          | GO:0006656                                           | phosphatidylcholine biosynthetic process              |    |
| module_142          | GO:0006644                                           | phospholipid metabolic process                        |    |
| module_142          | GO:0006650                                           | glycerophospholipid metabolic process                 |    |
| module_142          | GO:0008654                                           | phospholipid biosynthetic process                     |    |
| module_142          | GO:0045017                                           | glycerolipid biosynthetic process                     |    |
| module_142          | GO:0046470                                           | phosphatidylcholine metabolic process                 |    |
| module_142          | GO:0046474                                           | glycerophospholipid biosynthetic process              |    |
| module_142          | GO:0046486                                           | glycerolipid metabolic process                        |    |
| module_265          | GO:0006633                                           | fatty acid biosynthetic process                       |    |
| module_265          | GO:0006631                                           | fatty acid metabolic process                          |    |
| module_265          | GO:0008610                                           | lipid biosynthetic process                            |    |
| module_265          | GO:0044255                                           | cellular lipid metabolic process                      |    |
| module_315          | GO:0010025                                           | wax biosynthetic process                              |    |
| module_315          | GO:0010166                                           | wax metabolic process                                 |    |
| module_433          | GO:0016119                                           | carotene metabolic process                            |    |
| module_456          | GO:0045337                                           | farnesyl diphosphate biosynthetic process             |    |
| module_456          | GO:0016090                                           | prenol metabolic process                              |    |
| module_456          | GO:0016091                                           | prenol biosynthetic process                           |    |
| module_456          | GO:0016093                                           | polyprenol metabolic process                          |    |
| module_456          | GO:0016094                                           | polyprenol biosynthetic process                       |    |
| module_456          | GO:0045338                                           | farnesyl diphosphate metabolic process                |    |

|                     |                                      |                                                               |     |
|---------------------|--------------------------------------|---------------------------------------------------------------|-----|
| module_476          | GO:0010143                           | cutin biosynthetic process                                    |     |
| Slim id: GO:0006810 | transport                            |                                                               | 8   |
| module_261          | GO:0046865                           | terpenoid transport                                           |     |
| module_261          | GO:0046864                           | isoprenoid transport                                          |     |
| module_375          | GO:0015712                           | hexose phosphate transport                                    |     |
| module_375          | GO:0008645                           | hexose transport                                              |     |
| module_375          | GO:0015749                           | monosaccharide transport                                      |     |
| module_538          | GO:0015743                           | malate transport                                              |     |
| module_538          | GO:0006835                           | dicarboxylic acid transport                                   |     |
| module_538          | GO:0015740                           | C4-dicarboxylate transport                                    |     |
| Slim id: GO:0006811 | ion transport                        |                                                               | 2   |
| module_342          | GO:0015700                           | arsenite transport                                            |     |
| module_544          | GO:0015706                           | nitrate transport                                             |     |
| Slim id: GO:0006950 | response to stress                   |                                                               | 16  |
| module_277          | GO:0009408                           | response to heat                                              |     |
| module_277          | GO:0042542                           | response to hydrogen peroxide                                 |     |
| module_277          | GO:0000302                           | response to reactive oxygen species                           |     |
| module_277          | GO:0006950                           | response to stress                                            |     |
| module_316          | GO:0016068                           | type I hypersensitivity                                       |     |
| module_316          | GO:0002437                           | inflammatory response to antigenic stimulus                   |     |
| module_316          | GO:0002438                           | acute inflammatory response to antigenic stimulus             |     |
| module_316          | GO:0002524                           | hypersensitivity                                              |     |
| module_316          | GO:0002526                           | acute inflammatory response                                   |     |
| module_319          | GO:0006979                           | response to oxidative stress                                  |     |
| module_333          | GO:0009870                           | defense response signaling pathway, resistance gene-dependent |     |
| module_343          | GO:0009408                           | response to heat                                              |     |
| module_343          | GO:0006950                           | response to stress                                            |     |
| module_406          | GO:0009631                           | cold acclimation                                              |     |
| module_406          | GO:0009414                           | response to water deprivation                                 |     |
| module_448          | GO:0001666                           | response to hypoxia                                           |     |
| Slim id: GO:0006996 | organelle organization               |                                                               | 36  |
| module_167          | GO:0006334                           | nucleosome assembly                                           |     |
| module_167          | GO:0006325                           | chromatin organization                                        |     |
| module_167          | GO:0006333                           | chromatin assembly or disassembly                             |     |
| module_167          | GO:0006996                           | organelle organization                                        |     |
| module_167          | GO:0031497                           | chromatin assembly                                            |     |
| module_167          | GO:0034728                           | nucleosome organization                                       |     |
| module_167          | GO:0051276                           | chromosome organization                                       |     |
| module_286          | GO:0006334                           | nucleosome assembly                                           |     |
| module_286          | GO:0006325                           | chromatin organization                                        |     |
| module_286          | GO:0006333                           | chromatin assembly or disassembly                             |     |
| module_286          | GO:0006996                           | organelle organization                                        |     |
| module_286          | GO:0031497                           | chromatin assembly                                            |     |
| module_286          | GO:0034728                           | nucleosome organization                                       |     |
| module_286          | GO:0051276                           | chromosome organization                                       |     |
| module_400          | GO:0006334                           | nucleosome assembly                                           |     |
| module_400          | GO:0006325                           | chromatin organization                                        |     |
| module_400          | GO:0006333                           | chromatin assembly or disassembly                             |     |
| module_400          | GO:0006996                           | organelle organization                                        |     |
| module_400          | GO:0031497                           | chromatin assembly                                            |     |
| module_400          | GO:0034728                           | nucleosome organization                                       |     |
| module_400          | GO:0051276                           | chromosome organization                                       |     |
| module_408          | GO:0051225                           | spindle assembly                                              |     |
| module_56           | GO:0006334                           | nucleosome assembly                                           |     |
| module_56           | GO:0006325                           | chromatin organization                                        |     |
| module_56           | GO:0006333                           | chromatin assembly or disassembly                             |     |
| module_56           | GO:0006996                           | organelle organization                                        |     |
| module_56           | GO:0031497                           | chromatin assembly                                            |     |
| module_56           | GO:0034728                           | nucleosome organization                                       |     |
| module_56           | GO:0051276                           | chromosome organization                                       |     |
| module_598          | GO:0006334                           | nucleosome assembly                                           |     |
| module_598          | GO:0006325                           | chromatin organization                                        |     |
| module_598          | GO:0006333                           | chromatin assembly or disassembly                             |     |
| module_598          | GO:0006996                           | organelle organization                                        |     |
| module_598          | GO:0031497                           | chromatin assembly                                            |     |
| module_598          | GO:0034728                           | nucleosome organization                                       |     |
| module_598          | GO:0051276                           | chromosome organization                                       |     |
| Slim id: GO:0007005 | mitochondrion organization           |                                                               | 1   |
| module_485          | GO:0007005                           | mitochondrion organization                                    |     |
| Slim id: GO:0007010 | cytoskeleton organization            |                                                               | 1   |
| module_408          | GO:0051225                           | spindle assembly                                              |     |
| Slim id: GO:0007049 | cell cycle                           |                                                               | 3   |
| module_168          | GO:0007049                           | cell cycle                                                    |     |
| module_408          | GO:0051225                           | spindle assembly                                              |     |
| module_408          | GO:0007049                           | cell cycle                                                    |     |
| Slim id: GO:0007275 | multicellular organismal development |                                                               | 9   |
| module_263          | GO:0048700                           | acquisition of desiccation tolerance                          |     |
| module_293          | GO:0048481                           | ovule development                                             |     |
| module_293          | GO:0048437                           | floral organ development                                      |     |
| module_293          | GO:0048438                           | floral whorl development                                      |     |
| module_293          | GO:0048440                           | carpel development                                            |     |
| module_293          | GO:0048467                           | gynoecium development                                         |     |
| module_293          | GO:0048569                           | post-embryonic organ development                              |     |
| module_589          | GO:0010444                           | guard mother cell differentiation                             |     |
| module_589          | GO:0010440                           | stomatal lineage progression                                  |     |
| Slim id: GO:0008150 | biological_process                   |                                                               | 361 |
| module_113          | GO:0006413                           | translational initiation                                      |     |
| module_118          | GO:0042550                           | photosystem I stabilization                                   |     |
| module_118          | GO:0019375                           | galactolipid biosynthetic process                             |     |
| module_118          | GO:0006643                           | membrane lipid metabolic process                              |     |
| module_118          | GO:0006664                           | glycolipid metabolic process                                  |     |
| module_118          | GO:0009247                           | glycolipid biosynthetic process                               |     |
| module_118          | GO:0010109                           | regulation of photosynthesis                                  |     |
| module_118          | GO:0019374                           | galactolipid metabolic process                                |     |
| module_118          | GO:0042548                           | regulation of photosynthesis, light reaction                  |     |
| module_118          | GO:0043467                           | regulation of generation of precursor metabolites and energy  |     |
| module_118          | GO:0046467                           | membrane lipid biosynthetic process                           |     |
| module_12           | GO:0006556                           | S-adenosylmethionine biosynthetic process                     |     |
| module_12           | GO:0000097                           | sulfur amino acid biosynthetic process                        |     |
| module_12           | GO:0046500                           | S-adenosylmethionine metabolic process                        |     |
| module_125          | GO:0009853                           | photorespiration                                              |     |
| module_125          | GO:0043094                           | cellular metabolic compound salvage                           |     |
| module_128          | GO:0006878                           | cellular copper ion homeostasis                               |     |
| module_128          | GO:0030005                           | cellular di-, tri-valent inorganic cation homeostasis         |     |
| module_128          | GO:0055070                           | copper ion homeostasis                                        |     |
| module_141          | GO:0006468                           | protein amino acid phosphorylation                            |     |
| module_142          | GO:0006656                           | phosphatidylcholine biosynthetic process                      |     |
| module_142          | GO:0006576                           | cellular biogenic amine metabolic process                     |     |

|            |            |                                                            |
|------------|------------|------------------------------------------------------------|
| module_142 | GO:0006644 | phospholipid metabolic process                             |
| module_142 | GO:0006650 | glycerophospholipid metabolic process                      |
| module_142 | GO:0008654 | phospholipid biosynthetic process                          |
| module_142 | GO:0042439 | ethanolamine and derivative metabolic process              |
| module_142 | GO:0045017 | glycerolipid biosynthetic process                          |
| module_142 | GO:0046470 | phosphatidylcholine metabolic process                      |
| module_142 | GO:0046474 | glycerophospholipid biosynthetic process                   |
| module_142 | GO:0046486 | glycerolipid metabolic process                             |
| module_167 | GO:0006334 | nucleosome assembly                                        |
| module_167 | GO:0006323 | DNA packaging                                              |
| module_167 | GO:0022607 | cellular component assembly                                |
| module_167 | GO:0031497 | chromatin assembly                                         |
| module_167 | GO:0034621 | cellular macromolecular complex subunit organization       |
| module_167 | GO:0034622 | cellular macromolecular complex assembly                   |
| module_167 | GO:0034728 | nucleosome organization                                    |
| module_167 | GO:0044085 | cellular component biogenesis                              |
| module_167 | GO:0065003 | macromolecular complex assembly                            |
| module_167 | GO:0065004 | protein-DNA complex assembly                               |
| module_167 | GO:0071103 | DNA conformation change                                    |
| module_170 | GO:0019253 | reductive pentose-phosphate cycle                          |
| module_170 | GO:0015979 | photosynthesis                                             |
| module_170 | GO:0019685 | photosynthesis, dark reaction                              |
| module_180 | GO:0006084 | acetyl-CoA metabolic process                               |
| module_202 | GO:0033014 | tetrapyrrole biosynthetic process                          |
| module_202 | GO:0033013 | tetrapyrrole metabolic process                             |
| module_222 | GO:0006364 | rRNA processing                                            |
| module_222 | GO:0006396 | RNA processing                                             |
| module_222 | GO:0016072 | rRNA metabolic process                                     |
| module_222 | GO:0022613 | ribonucleoprotein complex biogenesis                       |
| module_222 | GO:0034470 | ncRNA processing                                           |
| module_222 | GO:0034660 | ncRNA metabolic process                                    |
| module_222 | GO:0042254 | ribosome biogenesis                                        |
| module_236 | GO:0009698 | phenylpropanoid metabolic process                          |
| module_236 | GO:0006725 | cellular aromatic compound metabolic process               |
| module_236 | GO:0009699 | phenylpropanoid biosynthetic process                       |
| module_236 | GO:0009812 | flavonoid metabolic process                                |
| module_236 | GO:0009813 | flavonoid biosynthetic process                             |
| module_236 | GO:0019438 | aromatic compound biosynthetic process                     |
| module_236 | GO:0042398 | cellular amino acid derivative biosynthetic process        |
| module_237 | GO:0034645 | cellular macromolecule biosynthetic process                |
| module_249 | GO:0006558 | L-phenylalanine metabolic process                          |
| module_249 | GO:0009698 | phenylpropanoid metabolic process                          |
| module_249 | GO:0019438 | aromatic compound biosynthetic process                     |
| module_249 | GO:0006725 | cellular aromatic compound metabolic process               |
| module_249 | GO:0009072 | aromatic amino acid family metabolic process               |
| module_249 | GO:0043648 | dicarboxylic acid metabolic process                        |
| module_259 | GO:0006511 | ubiquitin-dependent protein catabolic process              |
| module_259 | GO:0019941 | modification-dependent protein catabolic process           |
| module_259 | GO:0043632 | modification-dependent macromolecule catabolic process     |
| module_259 | GO:0044248 | cellular catabolic process                                 |
| module_259 | GO:0044257 | cellular protein catabolic process                         |
| module_259 | GO:0044265 | cellular macromolecule catabolic process                   |
| module_259 | GO:0051603 | proteolysis involved in cellular protein catabolic process |
| module_261 | GO:0046865 | terpenoid transport                                        |
| module_261 | GO:0046864 | isoprenoid transport                                       |
| module_263 | GO:0048700 | acquisition of desiccation tolerance                       |
| module_265 | GO:0006633 | fatty acid biosynthetic process                            |
| module_265 | GO:0006631 | fatty acid metabolic process                               |
| module_265 | GO:0016053 | organic acid biosynthetic process                          |
| module_265 | GO:0032787 | monocarboxylic acid metabolic process                      |
| module_265 | GO:0044255 | cellular lipid metabolic process                           |
| module_265 | GO:0046394 | carboxylic acid biosynthetic process                       |
| module_266 | GO:0006355 | regulation of transcription, DNA-dependent                 |
| module_266 | GO:0051252 | regulation of RNA metabolic process                        |
| module_271 | GO:0018401 | peptidyl-proline hydroxylation to 4-hydroxy-L-proline      |
| module_271 | GO:0019471 | 4-hydroxyproline metabolic process                         |
| module_272 | GO:0006096 | glycolysis                                                 |
| module_277 | GO:0042542 | response to hydrogen peroxide                              |
| module_277 | GO:0006457 | protein folding                                            |
| module_277 | GO:0000302 | response to reactive oxygen species                        |
| module_277 | GO:0010035 | response to inorganic substance                            |
| module_286 | GO:0006334 | nucleosome assembly                                        |
| module_286 | GO:0006323 | DNA packaging                                              |
| module_286 | GO:0022607 | cellular component assembly                                |
| module_286 | GO:0031497 | chromatin assembly                                         |
| module_286 | GO:0034621 | cellular macromolecular complex subunit organization       |
| module_286 | GO:0034622 | cellular macromolecular complex assembly                   |
| module_286 | GO:0034728 | nucleosome organization                                    |
| module_286 | GO:0044085 | cellular component biogenesis                              |
| module_286 | GO:0065003 | macromolecular complex assembly                            |
| module_286 | GO:0065004 | protein-DNA complex assembly                               |
| module_286 | GO:0071103 | DNA conformation change                                    |
| module_286 | GO:0042254 | ribosome biogenesis                                        |
| module_290 | GO:0034645 | cellular macromolecule biosynthetic process                |
| module_290 | GO:0006414 | translational elongation                                   |
| module_290 | GO:0009987 | cellular process                                           |
| module_290 | GO:0022613 | ribonucleoprotein complex biogenesis                       |
| module_290 | GO:0044085 | cellular component biogenesis                              |
| module_290 | GO:0044237 | cellular metabolic process                                 |
| module_290 | GO:0044249 | cellular biosynthetic process                              |
| module_290 | GO:0044260 | cellular macromolecule metabolic process                   |
| module_290 | GO:0044267 | cellular protein metabolic process                         |
| module_293 | GO:0006418 | tRNA aminoacylation for protein translation                |
| module_293 | GO:0048481 | ovule development                                          |
| module_293 | GO:0006399 | tRNA metabolic process                                     |
| module_293 | GO:0006431 | methionyl-tRNA aminoacylation                              |
| module_293 | GO:0006520 | cellular amino acid metabolic process                      |
| module_293 | GO:0034660 | ncRNA metabolic process                                    |
| module_293 | GO:0043038 | amino acid activation                                      |
| module_293 | GO:0043039 | tRNA aminoacylation                                        |
| module_293 | GO:0044106 | cellular amine metabolic process                           |
| module_293 | GO:0048437 | floral organ development                                   |
| module_293 | GO:0048438 | floral whorl development                                   |
| module_293 | GO:0048440 | carpel development                                         |
| module_293 | GO:0048467 | gynoecium development                                      |
| module_293 | GO:0048569 | post-embryonic organ development                           |
| module_296 | GO:0006552 | leucine catabolic process                                  |
| module_303 | GO:0009765 | photosynthesis, light harvesting                           |
| module_303 | GO:0015979 | photosynthesis                                             |
| module_303 | GO:0009768 | photosynthesis, light harvesting in photosystem I          |
| module_303 | GO:0019684 | photosynthesis, light reaction                             |
| module_313 | GO:0044267 | cellular protein metabolic process                         |
| module_313 | GO:0034645 | cellular macromolecule biosynthetic process                |
| module_313 | GO:0044237 | cellular metabolic process                                 |
| module_313 | GO:0044249 | cellular biosynthetic process                              |
| module_313 | GO:0044260 | cellular macromolecule metabolic process                   |
| module_313 | GO:0010025 | wax biosynthetic process                                   |

|            |            |                                                                                                                           |
|------------|------------|---------------------------------------------------------------------------------------------------------------------------|
| module_315 | GO:0010166 | wax metabolic process                                                                                                     |
| module_316 | GO:0016068 | type I hypersensitivity                                                                                                   |
| module_316 | GO:0002250 | adaptive immune response                                                                                                  |
| module_316 | GO:0002437 | inflammatory response to antigenic stimulus                                                                               |
| module_316 | GO:0002438 | acute inflammatory response to antigenic stimulus                                                                         |
| module_316 | GO:0002443 | leukocyte mediated immunity                                                                                               |
| module_316 | GO:0002449 | lymphocyte mediated immunity                                                                                              |
| module_316 | GO:0002460 | adaptive immune response based on somatic recombination of immune receptors built from immunoglobulin superfamily domains |
| module_316 | GO:0002524 | hypersensitivity                                                                                                          |
| module_316 | GO:0016064 | immunoglobulin mediated immune response                                                                                   |
| module_316 | GO:0019724 | B cell mediated immunity                                                                                                  |
| module_317 | GO:0009769 | photosynthesis, light harvesting in photosystem II                                                                        |
| module_317 | GO:0009765 | photosynthesis, light harvesting                                                                                          |
| module_317 | GO:0015979 | photosynthesis                                                                                                            |
| module_317 | GO:0019684 | photosynthesis, light reaction                                                                                            |
| module_319 | GO:0006979 | response to oxidative stress                                                                                              |
| module_323 | GO:0009767 | photosynthetic electron transport chain                                                                                   |
| module_323 | GO:0015979 | photosynthesis                                                                                                            |
| module_323 | GO:0019684 | photosynthesis, light reaction                                                                                            |
| module_333 | GO:0009870 | defense response signaling pathway, resistance gene-dependent                                                             |
| module_355 | GO:0010289 | homogalacturonan biosynthetic process                                                                                     |
| module_355 | GO:0033692 | cellular polysaccharide biosynthetic process                                                                              |
| module_355 | GO:0034637 | cellular carbohydrate biosynthetic process                                                                                |
| module_355 | GO:0044264 | cellular polysaccharide metabolic process                                                                                 |
| module_355 | GO:0045489 | pectin biosynthetic process                                                                                               |
| module_356 | GO:0009652 | thigmotropism                                                                                                             |
| module_356 | GO:0009606 | tropism                                                                                                                   |
| module_357 | GO:0055062 | phosphate ion homeostasis                                                                                                 |
| module_357 | GO:0030002 | cellular anion homeostasis                                                                                                |
| module_357 | GO:0030319 | cellular di-, tri-valent inorganic anion homeostasis                                                                      |
| module_357 | GO:0030643 | cellular phosphate ion homeostasis                                                                                        |
| module_357 | GO:0055061 | di-, tri-valent inorganic anion homeostasis                                                                               |
| module_357 | GO:0055081 | anion homeostasis                                                                                                         |
| module_361 | GO:0010477 | response to sulfur dioxide                                                                                                |
| module_371 | GO:0016070 | RNA metabolic process                                                                                                     |
| module_380 | GO:0034645 | cellular macromolecule biosynthetic process                                                                               |
| module_380 | GO:0044249 | cellular biosynthetic process                                                                                             |
| module_380 | GO:0044260 | cellular macromolecule metabolic process                                                                                  |
| module_380 | GO:0044267 | cellular protein metabolic process                                                                                        |
| module_391 | GO:0006468 | protein amino acid phosphorylation                                                                                        |
| module_400 | GO:0006334 | nucleosome assembly                                                                                                       |
| module_400 | GO:0006323 | DNA packaging                                                                                                             |
| module_400 | GO:0022607 | cellular component assembly                                                                                               |
| module_400 | GO:0031497 | chromatin assembly                                                                                                        |
| module_400 | GO:0034621 | cellular macromolecular complex subunit organization                                                                      |
| module_400 | GO:0034622 | cellular macromolecular complex assembly                                                                                  |
| module_400 | GO:0034728 | nucleosome organization                                                                                                   |
| module_400 | GO:0044085 | cellular component biogenesis                                                                                             |
| module_400 | GO:0065003 | macromolecular complex assembly                                                                                           |
| module_400 | GO:0065004 | protein-DNA complex assembly                                                                                              |
| module_400 | GO:0071103 | DNA conformation change                                                                                                   |
| module_403 | GO:0007600 | sensory perception                                                                                                        |
| module_403 | GO:0010161 | red light signaling pathway                                                                                               |
| module_403 | GO:0003008 | system process                                                                                                            |
| module_403 | GO:0050877 | neurological system process                                                                                               |
| module_403 | GO:0071491 | cellular response to red light                                                                                            |
| module_404 | GO:0006468 | protein amino acid phosphorylation                                                                                        |
| module_404 | GO:0006793 | phosphorus metabolic process                                                                                              |
| module_404 | GO:0006796 | phosphate metabolic process                                                                                               |
| module_404 | GO:0016310 | phosphorylation                                                                                                           |
| module_406 | GO:0009961 | response to 1-aminocyclopropane-1-carboxylic acid                                                                         |
| module_406 | GO:0009414 | response to water deprivation                                                                                             |
| module_406 | GO:0009737 | response to abscisic acid stimulus                                                                                        |
| module_406 | GO:0009415 | response to water                                                                                                         |
| module_408 | GO:0007018 | microtubule-based movement                                                                                                |
| module_408 | GO:0051225 | spindle assembly                                                                                                          |
| module_408 | GO:0007017 | microtubule-based process                                                                                                 |
| module_41  | GO:0042254 | ribosome biogenesis                                                                                                       |
| module_41  | GO:0022613 | ribonucleoprotein complex biogenesis                                                                                      |
| module_41  | GO:0034645 | cellular macromolecule biosynthetic process                                                                               |
| module_41  | GO:0044249 | cellular biosynthetic process                                                                                             |
| module_41  | GO:0044260 | cellular macromolecule metabolic process                                                                                  |
| module_41  | GO:0044267 | cellular protein metabolic process                                                                                        |
| module_410 | GO:0042254 | ribosome biogenesis                                                                                                       |
| module_410 | GO:0022613 | ribonucleoprotein complex biogenesis                                                                                      |
| module_410 | GO:0034645 | cellular macromolecule biosynthetic process                                                                               |
| module_410 | GO:0044237 | cellular metabolic process                                                                                                |
| module_410 | GO:0044249 | cellular biosynthetic process                                                                                             |
| module_410 | GO:0044260 | cellular macromolecule metabolic process                                                                                  |
| module_410 | GO:0044267 | cellular protein metabolic process                                                                                        |
| module_413 | GO:0005998 | xylulose catabolic process                                                                                                |
| module_413 | GO:0006573 | valine metabolic process                                                                                                  |
| module_413 | GO:0005996 | monosaccharide metabolic process                                                                                          |
| module_413 | GO:0005997 | xylulose metabolic process                                                                                                |
| module_413 | GO:0019323 | pentose catabolic process                                                                                                 |
| module_413 | GO:0044275 | cellular carbohydrate catabolic process                                                                                   |
| module_419 | GO:0046365 | monosaccharide catabolic process                                                                                          |
| module_419 | GO:0051555 | flavonol biosynthetic process                                                                                             |
| module_419 | GO:0051552 | flavone metabolic process                                                                                                 |
| module_419 | GO:0051553 | flavone biosynthetic process                                                                                              |
| module_419 | GO:0051554 | flavonol metabolic process                                                                                                |
| module_421 | GO:0006796 | phosphate metabolic process                                                                                               |
| module_421 | GO:0006793 | phosphorus metabolic process                                                                                              |
| module_429 | GO:0009765 | photosynthesis, light harvesting                                                                                          |
| module_429 | GO:0019684 | photosynthesis, light reaction                                                                                            |
| module_433 | GO:0016119 | carotene metabolic process                                                                                                |
| module_448 | GO:0001666 | response to hypoxia                                                                                                       |
| module_448 | GO:0070482 | response to oxygen levels                                                                                                 |
| module_456 | GO:0045337 | farnesyl diphosphate biosynthetic process                                                                                 |
| module_456 | GO:0016090 | prenol metabolic process                                                                                                  |
| module_456 | GO:0016091 | prenol biosynthetic process                                                                                               |
| module_456 | GO:0016093 | polyprenol metabolic process                                                                                              |
| module_456 | GO:0016094 | polyprenol biosynthetic process                                                                                           |
| module_456 | GO:0045338 | farnesyl diphosphate metabolic process                                                                                    |
| module_467 | GO:0006457 | protein folding                                                                                                           |
| module_467 | GO:0006779 | porphyrin biosynthetic process                                                                                            |
| module_467 | GO:0044237 | cellular metabolic process                                                                                                |
| module_467 | GO:0006778 | porphyrin metabolic process                                                                                               |
| module_467 | GO:0033013 | tetrapyrrole metabolic process                                                                                            |
| module_467 | GO:0033014 | tetrapyrrole biosynthetic process                                                                                         |
| module_467 | GO:0044267 | cellular protein metabolic process                                                                                        |
| module_471 | GO:0043086 | negative regulation of catalytic activity                                                                                 |
| module_471 | GO:0007186 | G-protein coupled receptor protein signaling pathway                                                                      |
| module_471 | GO:0044092 | negative regulation of molecular function                                                                                 |
| module_473 | GO:0006396 | RNA processing                                                                                                            |
| module_476 | GO:0010143 | cutin biosynthetic process                                                                                                |
| module_480 | GO:0034645 | cellular macromolecule biosynthetic process                                                                               |

|            |            |                                                                                                            |
|------------|------------|------------------------------------------------------------------------------------------------------------|
| module_480 | GO:0044249 | cellular biosynthetic process                                                                              |
| module_480 | GO:0044260 | cellular macromolecule metabolic process                                                                   |
| module_480 | GO:0044267 | cellular protein metabolic process                                                                         |
| module_491 | GO:0006418 | tRNA aminoacylation for protein translation                                                                |
| module_491 | GO:0043038 | amino acid activation                                                                                      |
| module_491 | GO:0043039 | tRNA aminoacylation                                                                                        |
| module_502 | GO:0046274 | lignin catabolic process                                                                                   |
| module_502 | GO:0046271 | phenylpropanoid catabolic process                                                                          |
| module_521 | GO:0010253 | UDP-rhamnose biosynthetic process                                                                          |
| module_521 | GO:0009226 | nucleotide-sugar biosynthetic process                                                                      |
| module_521 | GO:0019299 | rhamnose metabolic process                                                                                 |
| module_521 | GO:0019300 | rhamnose biosynthetic process                                                                              |
| module_521 | GO:0019319 | hexose biosynthetic process                                                                                |
| module_521 | GO:0033478 | UDP-rhamnose metabolic process                                                                             |
| module_529 | GO:0034645 | cellular macromolecule biosynthetic process                                                                |
| module_529 | GO:0044249 | cellular biosynthetic process                                                                              |
| module_529 | GO:0044260 | cellular macromolecule metabolic process                                                                   |
| module_529 | GO:0044267 | cellular protein metabolic process                                                                         |
| module_538 | GO:0051453 | regulation of intracellular pH                                                                             |
| module_538 | GO:0030004 | cellular monovalent inorganic cation homeostasis                                                           |
| module_538 | GO:0030641 | regulation of cellular pH                                                                                  |
| module_540 | GO:0006552 | leucine catabolic process                                                                                  |
| module_543 | GO:0019379 | sulfate assimilation, phosphoadenylyl sulfate reduction by phosphoadenylyl-sulfate reductase (thioredoxin) |
| module_543 | GO:0019419 | sulfate reduction                                                                                          |
| module_544 | GO:0010167 | response to nitrate                                                                                        |
| module_548 | GO:0009834 | secondary cell wall biogenesis                                                                             |
| module_548 | GO:0030244 | cellulose biosynthetic process                                                                             |
| module_548 | GO:0009832 | plant-type cell wall biogenesis                                                                            |
| module_548 | GO:0042546 | cell wall biogenesis                                                                                       |
| module_553 | GO:0006268 | DNA unwinding involved in replication                                                                      |
| module_553 | GO:0006270 | DNA-dependent DNA replication initiation                                                                   |
| module_553 | GO:0006260 | DNA replication                                                                                            |
| module_553 | GO:0006261 | DNA-dependent DNA replication                                                                              |
| module_553 | GO:0032392 | DNA geometric change                                                                                       |
| module_553 | GO:0032508 | DNA duplex unwinding                                                                                       |
| module_553 | GO:0034641 | cellular nitrogen compound metabolic process                                                               |
| module_553 | GO:0034645 | cellular macromolecule biosynthetic process                                                                |
| module_553 | GO:0044260 | cellular macromolecule metabolic process                                                                   |
| module_553 | GO:0071103 | DNA conformation change                                                                                    |
| module_554 | GO:0006260 | DNA replication                                                                                            |
| module_557 | GO:0030418 | nicotianamine biosynthetic process                                                                         |
| module_557 | GO:0030417 | nicotianamine metabolic process                                                                            |
| module_56  | GO:0006334 | nucleosome assembly                                                                                        |
| module_56  | GO:0006323 | DNA packaging                                                                                              |
| module_56  | GO:0022607 | cellular component assembly                                                                                |
| module_56  | GO:0031497 | chromatin assembly                                                                                         |
| module_56  | GO:0034621 | cellular macromolecular complex subunit organization                                                       |
| module_56  | GO:0034622 | cellular macromolecular complex assembly                                                                   |
| module_56  | GO:0034728 | nucleosome organization                                                                                    |
| module_56  | GO:0044085 | cellular component biogenesis                                                                              |
| module_56  | GO:0065003 | macromolecular complex assembly                                                                            |
| module_56  | GO:0065004 | protein-DNA complex assembly                                                                               |
| module_56  | GO:0071103 | DNA conformation change                                                                                    |
| module_563 | GO:0030244 | cellulose biosynthetic process                                                                             |
| module_563 | GO:0009832 | plant-type cell wall biogenesis                                                                            |
| module_563 | GO:0033692 | cellular polysaccharide biosynthetic process                                                               |
| module_563 | GO:0034637 | cellular carbohydrate biosynthetic process                                                                 |
| module_563 | GO:0042546 | cell wall biogenesis                                                                                       |
| module_563 | GO:0044264 | cellular polysaccharide metabolic process                                                                  |
| module_567 | GO:0006468 | protein amino acid phosphorylation                                                                         |
| module_567 | GO:0006793 | phosphorus metabolic process                                                                               |
| module_567 | GO:0006796 | phosphate metabolic process                                                                                |
| module_567 | GO:0016310 | phosphorylation                                                                                            |
| module_567 | GO:0044267 | cellular protein metabolic process                                                                         |
| module_569 | GO:0034645 | cellular macromolecule biosynthetic process                                                                |
| module_569 | GO:0044267 | cellular protein metabolic process                                                                         |
| module_581 | GO:0006468 | protein amino acid phosphorylation                                                                         |
| module_581 | GO:0006793 | phosphorus metabolic process                                                                               |
| module_581 | GO:0006796 | phosphate metabolic process                                                                                |
| module_581 | GO:0016310 | phosphorylation                                                                                            |
| module_589 | GO:0019252 | starch biosynthetic process                                                                                |
| module_589 | GO:0010444 | guard mother cell differentiation                                                                          |
| module_589 | GO:0005982 | starch metabolic process                                                                                   |
| module_589 | GO:0010021 | amylopectin biosynthetic process                                                                           |
| module_589 | GO:0010440 | stomatal lineage progression                                                                               |
| module_592 | GO:0006468 | protein amino acid phosphorylation                                                                         |
| module_592 | GO:0006793 | phosphorus metabolic process                                                                               |
| module_592 | GO:0006796 | phosphate metabolic process                                                                                |
| module_592 | GO:0016310 | phosphorylation                                                                                            |
| module_598 | GO:0006334 | nucleosome assembly                                                                                        |
| module_598 | GO:0006323 | DNA packaging                                                                                              |
| module_598 | GO:0022607 | cellular component assembly                                                                                |
| module_598 | GO:0031497 | chromatin assembly                                                                                         |
| module_598 | GO:0034621 | cellular macromolecular complex subunit organization                                                       |
| module_598 | GO:0034622 | cellular macromolecular complex assembly                                                                   |
| module_598 | GO:0034728 | nucleosome organization                                                                                    |
| module_598 | GO:0044085 | cellular component biogenesis                                                                              |
| module_598 | GO:0065003 | macromolecular complex assembly                                                                            |
| module_598 | GO:0065004 | protein-DNA complex assembly                                                                               |
| module_598 | GO:0071103 | DNA conformation change                                                                                    |
| module_603 | GO:0030244 | cellulose biosynthetic process                                                                             |
| module_603 | GO:0009250 | glucan biosynthetic process                                                                                |
| module_606 | GO:0006465 | signal peptide processing                                                                                  |
| module_606 | GO:0006518 | peptide metabolic process                                                                                  |
| module_67  | GO:0008535 | respiratory chain complex IV assembly                                                                      |
| module_72  | GO:0009739 | response to gibberellin stimulus                                                                           |
| module_82  | GO:0019915 | lipid storage                                                                                              |
| module_86  | GO:0006119 | oxidative phosphorylation                                                                                  |
| module_94  | GO:0005986 | sucrose biosynthetic process                                                                               |
| module_94  | GO:0005984 | disaccharide metabolic process                                                                             |
| module_94  | GO:0005985 | sucrose metabolic process                                                                                  |
| module_94  | GO:0016137 | glycoside metabolic process                                                                                |
| module_94  | GO:0016138 | glycoside biosynthetic process                                                                             |
| module_94  | GO:0034637 | cellular carbohydrate biosynthetic process                                                                 |
| module_94  | GO:0046351 | disaccharide biosynthetic process                                                                          |

Slim id: GO:0008152

|            |            |                                                              |
|------------|------------|--------------------------------------------------------------|
| module_118 | GO:0042550 | metabolic process                                            |
| module_118 | GO:0019375 | photosystem I stabilization                                  |
| module_118 | GO:0006643 | galactolipid biosynthetic process                            |
| module_118 | GO:0006664 | membrane lipid metabolic process                             |
| module_118 | GO:0009247 | glycolipid metabolic process                                 |
| module_118 | GO:0010109 | glycolipid biosynthetic process                              |
| module_118 | GO:0019374 | regulation of photosynthesis                                 |
| module_118 | GO:0019374 | galactolipid metabolic process                               |
| module_118 | GO:0042548 | regulation of photosynthesis, light reaction                 |
| module_118 | GO:0043467 | regulation of generation of precursor metabolites and energy |
| module_118 | GO:0046467 | membrane lipid biosynthetic process                          |

|            |            |                                                            |
|------------|------------|------------------------------------------------------------|
| module_12  | GO:0006556 | S-adenosylmethionine biosynthetic process                  |
| module_12  | GO:0000097 | sulfur amino acid biosynthetic process                     |
| module_12  | GO:0009119 | ribonucleoside metabolic process                           |
| module_12  | GO:0042278 | purine nucleoside metabolic process                        |
| module_12  | GO:0046128 | purine ribonucleoside metabolic process                    |
| module_12  | GO:0046500 | S-adenosylmethionine metabolic process                     |
| module_125 | GO:0009853 | photorespiration                                           |
| module_125 | GO:0043094 | cellular metabolic compound salvage                        |
| module_141 | GO:0006468 | protein amino acid phosphorylation                         |
| module_142 | GO:0006656 | phosphatidylcholine biosynthetic process                   |
| module_142 | GO:0006576 | cellular biogenic amine metabolic process                  |
| module_142 | GO:0006644 | phospholipid metabolic process                             |
| module_142 | GO:0006650 | glycerophospholipid metabolic process                      |
| module_142 | GO:0008654 | phospholipid biosynthetic process                          |
| module_142 | GO:0019637 | organophosphate metabolic process                          |
| module_142 | GO:0042439 | ethanolamine and derivative metabolic process              |
| module_142 | GO:0045017 | glycerolipid biosynthetic process                          |
| module_142 | GO:0046470 | phosphatidylcholine metabolic process                      |
| module_142 | GO:0046474 | glycerophospholipid biosynthetic process                   |
| module_142 | GO:0046486 | glycerolipid metabolic process                             |
| module_170 | GO:0019253 | reductive pentose-phosphate cycle                          |
| module_170 | GO:0015979 | photosynthesis                                             |
| module_170 | GO:0015977 | carbon fixation                                            |
| module_170 | GO:0019685 | photosynthesis, dark reaction                              |
| module_170 | GO:0071704 | organic substance metabolic process                        |
| module_180 | GO:0006084 | acetyl-CoA metabolic process                               |
| module_202 | GO:0033014 | tetrapyrrole biosynthetic process                          |
| module_202 | GO:0033013 | tetrapyrrole metabolic process                             |
| module_222 | GO:0006364 | rRNA processing                                            |
| module_222 | GO:0006396 | RNA processing                                             |
| module_222 | GO:0016072 | rRNA metabolic process                                     |
| module_222 | GO:0034470 | ncRNA processing                                           |
| module_222 | GO:0034660 | ncRNA metabolic process                                    |
| module_236 | GO:0009698 | phenylpropanoid metabolic process                          |
| module_236 | GO:0006725 | cellular aromatic compound metabolic process               |
| module_236 | GO:0009699 | phenylpropanoid biosynthetic process                       |
| module_236 | GO:0009812 | flavonoid metabolic process                                |
| module_236 | GO:0009813 | flavonoid biosynthetic process                             |
| module_236 | GO:0019438 | aromatic compound biosynthetic process                     |
| module_236 | GO:0042398 | cellular amino acid derivative biosynthetic process        |
| module_237 | GO:0009059 | macromolecule biosynthetic process                         |
| module_237 | GO:0010467 | gene expression                                            |
| module_237 | GO:0034645 | cellular macromolecule biosynthetic process                |
| module_249 | GO:0006558 | L-phenylalanine metabolic process                          |
| module_249 | GO:0009698 | phenylpropanoid metabolic process                          |
| module_249 | GO:0019438 | aromatic compound biosynthetic process                     |
| module_249 | GO:0006725 | cellular aromatic compound metabolic process               |
| module_249 | GO:0009072 | aromatic amino acid family metabolic process               |
| module_249 | GO:0043648 | dicarboxylic acid metabolic process                        |
| module_249 | GO:0044281 | small molecule metabolic process                           |
| module_259 | GO:0006511 | ubiquitin-dependent protein catabolic process              |
| module_259 | GO:0009057 | macromolecule catabolic process                            |
| module_259 | GO:0019941 | modification-dependent protein catabolic process           |
| module_259 | GO:0030163 | protein catabolic process                                  |
| module_259 | GO:0043632 | modification-dependent macromolecule catabolic process     |
| module_259 | GO:0044248 | cellular catabolic process                                 |
| module_259 | GO:0044257 | cellular protein catabolic process                         |
| module_259 | GO:0044265 | cellular macromolecule catabolic process                   |
| module_259 | GO:0051603 | proteolysis involved in cellular protein catabolic process |
| module_265 | GO:0006633 | fatty acid biosynthetic process                            |
| module_265 | GO:0006631 | fatty acid metabolic process                               |
| module_265 | GO:0016053 | organic acid biosynthetic process                          |
| module_265 | GO:0032787 | monocarboxylic acid metabolic process                      |
| module_265 | GO:0044255 | cellular lipid metabolic process                           |
| module_265 | GO:0046394 | carboxylic acid biosynthetic process                       |
| module_266 | GO:0006355 | regulation of transcription, DNA-dependent                 |
| module_266 | GO:0051252 | regulation of RNA metabolic process                        |
| module_271 | GO:0018401 | peptidyl-proline hydroxylation to 4-hydroxy-L-proline      |
| module_271 | GO:0019471 | 4-hydroxyproline metabolic process                         |
| module_272 | GO:0006096 | glycolysis                                                 |
| module_277 | GO:0006457 | protein folding                                            |
| module_285 | GO:0010467 | gene expression                                            |
| module_290 | GO:0034645 | cellular macromolecule biosynthetic process                |
| module_290 | GO:0010467 | gene expression                                            |
| module_290 | GO:0009059 | macromolecule biosynthetic process                         |
| module_290 | GO:0006414 | translational elongation                                   |
| module_290 | GO:0008152 | metabolic process                                          |
| module_290 | GO:0043170 | macromolecule metabolic process                            |
| module_290 | GO:0044237 | cellular metabolic process                                 |
| module_290 | GO:0044249 | cellular biosynthetic process                              |
| module_290 | GO:0044260 | cellular macromolecule metabolic process                   |
| module_290 | GO:0044267 | cellular protein metabolic process                         |
| module_293 | GO:0006418 | tRNA aminoacylation for protein translation                |
| module_293 | GO:0006399 | tRNA metabolic process                                     |
| module_293 | GO:0006431 | methionyl-tRNA aminoacylation                              |
| module_293 | GO:0006520 | cellular amino acid metabolic process                      |
| module_293 | GO:0034660 | ncRNA metabolic process                                    |
| module_293 | GO:0043038 | amino acid activation                                      |
| module_293 | GO:0043039 | tRNA aminoacylation                                        |
| module_293 | GO:0044106 | cellular amine metabolic process                           |
| module_296 | GO:0006552 | leucine catabolic process                                  |
| module_303 | GO:0009765 | photosynthesis, light harvesting                           |
| module_303 | GO:0015979 | photosynthesis                                             |
| module_303 | GO:0009768 | photosynthesis, light harvesting in photosystem I          |
| module_303 | GO:0019684 | photosynthesis, light reaction                             |
| module_313 | GO:0044267 | cellular protein metabolic process                         |
| module_313 | GO:0009059 | macromolecule biosynthetic process                         |
| module_313 | GO:0010467 | gene expression                                            |
| module_313 | GO:0034645 | cellular macromolecule biosynthetic process                |
| module_313 | GO:0043170 | macromolecule metabolic process                            |
| module_313 | GO:0044237 | cellular metabolic process                                 |
| module_313 | GO:0044249 | cellular biosynthetic process                              |
| module_313 | GO:0044260 | cellular macromolecule metabolic process                   |
| module_315 | GO:0010025 | wax biosynthetic process                                   |
| module_315 | GO:0010166 | wax metabolic process                                      |
| module_317 | GO:0009769 | photosynthesis, light harvesting in photosystem II         |
| module_317 | GO:0009765 | photosynthesis, light harvesting                           |
| module_317 | GO:0015979 | photosynthesis                                             |
| module_317 | GO:0019684 | photosynthesis, light reaction                             |
| module_323 | GO:0009767 | photosynthetic electron transport chain                    |
| module_323 | GO:0015979 | photosynthesis                                             |
| module_323 | GO:0019684 | photosynthesis, light reaction                             |
| module_323 | GO:0022900 | electron transport chain                                   |
| module_355 | GO:0010289 | homogalacturonan biosynthetic process                      |
| module_355 | GO:0000271 | polysaccharide biosynthetic process                        |
| module_355 | GO:0005976 | polysaccharide metabolic process                           |
| module_355 | GO:0033692 | cellular polysaccharide biosynthetic process               |

|            |            |                                                                                                            |
|------------|------------|------------------------------------------------------------------------------------------------------------|
| module_355 | GO:0034637 | cellular carbohydrate biosynthetic process                                                                 |
| module_355 | GO:0044264 | cellular polysaccharide metabolic process                                                                  |
| module_355 | GO:0045488 | pectin metabolic process                                                                                   |
| module_355 | GO:0045489 | pectin biosynthetic process                                                                                |
| module_358 | GO:0019751 | polyol metabolic process                                                                                   |
| module_371 | GO:0016070 | RNA metabolic process                                                                                      |
| module_378 | GO:0015977 | carbon fixation                                                                                            |
| module_378 | GO:0071704 | organic substance metabolic process                                                                        |
| module_380 | GO:0009059 | macromolecule biosynthetic process                                                                         |
| module_380 | GO:0010467 | gene expression                                                                                            |
| module_380 | GO:0034645 | cellular macromolecule biosynthetic process                                                                |
| module_380 | GO:0044249 | cellular biosynthetic process                                                                              |
| module_380 | GO:0044260 | cellular macromolecule metabolic process                                                                   |
| module_380 | GO:0044267 | cellular protein metabolic process                                                                         |
| module_391 | GO:0006468 | protein amino acid phosphorylation                                                                         |
| module_404 | GO:0006468 | protein amino acid phosphorylation                                                                         |
| module_404 | GO:0006793 | phosphorus metabolic process                                                                               |
| module_404 | GO:0006796 | phosphate metabolic process                                                                                |
| module_404 | GO:0016310 | phosphorylation                                                                                            |
| module_404 | GO:0043412 | macromolecule modification                                                                                 |
| module_41  | GO:0009059 | macromolecule biosynthetic process                                                                         |
| module_41  | GO:0010467 | gene expression                                                                                            |
| module_41  | GO:0034645 | cellular macromolecule biosynthetic process                                                                |
| module_41  | GO:0043170 | macromolecule metabolic process                                                                            |
| module_41  | GO:0044249 | cellular biosynthetic process                                                                              |
| module_41  | GO:0044260 | cellular macromolecule metabolic process                                                                   |
| module_41  | GO:0044267 | cellular protein metabolic process                                                                         |
| module_410 | GO:0009059 | macromolecule biosynthetic process                                                                         |
| module_410 | GO:0010467 | gene expression                                                                                            |
| module_410 | GO:0034645 | cellular macromolecule biosynthetic process                                                                |
| module_410 | GO:0043170 | macromolecule metabolic process                                                                            |
| module_410 | GO:0044237 | cellular metabolic process                                                                                 |
| module_410 | GO:0044249 | cellular biosynthetic process                                                                              |
| module_410 | GO:0044260 | cellular macromolecule metabolic process                                                                   |
| module_410 | GO:0044267 | cellular protein metabolic process                                                                         |
| module_413 | GO:0005998 | xylulose catabolic process                                                                                 |
| module_413 | GO:0006573 | valine metabolic process                                                                                   |
| module_413 | GO:0005996 | monosaccharide metabolic process                                                                           |
| module_413 | GO:0005997 | xylulose metabolic process                                                                                 |
| module_413 | GO:0006066 | alcohol metabolic process                                                                                  |
| module_413 | GO:0019323 | pentose catabolic process                                                                                  |
| module_413 | GO:0044275 | cellular carbohydrate catabolic process                                                                    |
| module_413 | GO:0044282 | small molecule catabolic process                                                                           |
| module_413 | GO:0046164 | alcohol catabolic process                                                                                  |
| module_413 | GO:0046365 | monosaccharide catabolic process                                                                           |
| module_419 | GO:0051555 | flavonol biosynthetic process                                                                              |
| module_419 | GO:0051552 | flavone metabolic process                                                                                  |
| module_419 | GO:0051553 | flavone biosynthetic process                                                                               |
| module_419 | GO:0051554 | flavonol metabolic process                                                                                 |
| module_421 | GO:0006796 | phosphate metabolic process                                                                                |
| module_421 | GO:0006793 | phosphorus metabolic process                                                                               |
| module_429 | GO:0009765 | photosynthesis, light harvesting                                                                           |
| module_429 | GO:0019684 | photosynthesis, light reaction                                                                             |
| module_433 | GO:0016119 | carotene metabolic process                                                                                 |
| module_433 | GO:0042440 | pigment metabolic process                                                                                  |
| module_456 | GO:0045337 | farnesyl diphosphate biosynthetic process                                                                  |
| module_456 | GO:0016090 | prenol metabolic process                                                                                   |
| module_456 | GO:0016091 | prenol biosynthetic process                                                                                |
| module_456 | GO:0016093 | polyprenol metabolic process                                                                               |
| module_456 | GO:0016094 | polyprenol biosynthetic process                                                                            |
| module_456 | GO:0045338 | farnesyl diphosphate metabolic process                                                                     |
| module_467 | GO:0006457 | protein folding                                                                                            |
| module_467 | GO:0006779 | porphyrin biosynthetic process                                                                             |
| module_467 | GO:0044237 | cellular metabolic process                                                                                 |
| module_467 | GO:0006778 | porphyrin metabolic process                                                                                |
| module_467 | GO:0033013 | tetrapyrrole metabolic process                                                                             |
| module_467 | GO:0033014 | tetrapyrrole biosynthetic process                                                                          |
| module_467 | GO:0044267 | cellular protein metabolic process                                                                         |
| module_471 | GO:0043086 | negative regulation of catalytic activity                                                                  |
| module_473 | GO:0006396 | RNA processing                                                                                             |
| module_476 | GO:0010143 | cutin biosynthetic process                                                                                 |
| module_480 | GO:0009059 | macromolecule biosynthetic process                                                                         |
| module_480 | GO:0010467 | gene expression                                                                                            |
| module_480 | GO:0034645 | cellular macromolecule biosynthetic process                                                                |
| module_480 | GO:0043170 | macromolecule metabolic process                                                                            |
| module_480 | GO:0044249 | cellular biosynthetic process                                                                              |
| module_480 | GO:0044260 | cellular macromolecule metabolic process                                                                   |
| module_480 | GO:0044267 | cellular protein metabolic process                                                                         |
| module_491 | GO:0006418 | tRNA aminoacylation for protein translation                                                                |
| module_491 | GO:0043038 | amino acid activation                                                                                      |
| module_491 | GO:0043039 | tRNA aminoacylation                                                                                        |
| module_502 | GO:0046274 | lignin catabolic process                                                                                   |
| module_502 | GO:0046271 | phenylpropanoid catabolic process                                                                          |
| module_521 | GO:0010253 | UDP-rhamnose biosynthetic process                                                                          |
| module_521 | GO:0009226 | nucleotide-sugar biosynthetic process                                                                      |
| module_521 | GO:0019299 | rhamnose metabolic process                                                                                 |
| module_521 | GO:0019300 | rhamnose biosynthetic process                                                                              |
| module_521 | GO:0019319 | hexose biosynthetic process                                                                                |
| module_521 | GO:0033478 | UDP-rhamnose metabolic process                                                                             |
| module_529 | GO:0009059 | macromolecule biosynthetic process                                                                         |
| module_529 | GO:0010467 | gene expression                                                                                            |
| module_529 | GO:0034645 | cellular macromolecule biosynthetic process                                                                |
| module_529 | GO:0044249 | cellular biosynthetic process                                                                              |
| module_529 | GO:0044260 | cellular macromolecule metabolic process                                                                   |
| module_529 | GO:0044267 | cellular protein metabolic process                                                                         |
| module_540 | GO:0006552 | leucine catabolic process                                                                                  |
| module_543 | GO:0019379 | sulfate assimilation, phosphoadenylyl sulfate reduction by phosphoadenylyl-sulfate reductase (thioredoxin) |
| module_543 | GO:0019419 | sulfate reduction                                                                                          |
| module_548 | GO:0030244 | cellulose biosynthetic process                                                                             |
| module_548 | GO:0030243 | cellulose metabolic process                                                                                |
| module_553 | GO:0006268 | DNA unwinding involved in replication                                                                      |
| module_553 | GO:0006270 | DNA-dependent DNA replication initiation                                                                   |
| module_553 | GO:0006260 | DNA replication                                                                                            |
| module_553 | GO:0006261 | DNA-dependent DNA replication                                                                              |
| module_553 | GO:0006807 | nitrogen compound metabolic process                                                                        |
| module_553 | GO:0009059 | macromolecule biosynthetic process                                                                         |
| module_553 | GO:0034641 | cellular nitrogen compound metabolic process                                                               |
| module_553 | GO:0034645 | cellular macromolecule biosynthetic process                                                                |
| module_553 | GO:0043170 | macromolecule metabolic process                                                                            |
| module_553 | GO:0044260 | cellular macromolecule metabolic process                                                                   |
| module_554 | GO:0006260 | DNA replication                                                                                            |
| module_557 | GO:0030418 | nicotianamine biosynthetic process                                                                         |
| module_557 | GO:0030417 | nicotianamine metabolic process                                                                            |
| module_563 | GO:0030244 | cellulose biosynthetic process                                                                             |
| module_563 | GO:0000271 | polysaccharide biosynthetic process                                                                        |
| module_563 | GO:0005976 | polysaccharide metabolic process                                                                           |
| module_563 | GO:0030243 | cellulose metabolic process                                                                                |



|                     |                      |                                                            |    |
|---------------------|----------------------|------------------------------------------------------------|----|
| module_563          | GO:0033692           | cellular polysaccharide biosynthetic process               |    |
| module_563          | GO:0034637           | cellular carbohydrate biosynthetic process                 |    |
| module_563          | GO:0044264           | cellular polysaccharide metabolic process                  |    |
| module_567          | GO:0006468           | protein amino acid phosphorylation                         |    |
| module_567          | GO:0006793           | phosphorus metabolic process                               |    |
| module_567          | GO:0006796           | phosphate metabolic process                                |    |
| module_567          | GO:0016310           | phosphorylation                                            |    |
| module_567          | GO:0043412           | macromolecule modification                                 |    |
| module_567          | GO:0044267           | cellular protein metabolic process                         |    |
| module_569          | GO:0009059           | macromolecule biosynthetic process                         |    |
| module_569          | GO:0010467           | gene expression                                            |    |
| module_569          | GO:0034645           | cellular macromolecule biosynthetic process                |    |
| module_569          | GO:0043170           | macromolecule metabolic process                            |    |
| module_569          | GO:0044267           | cellular protein metabolic process                         |    |
| module_581          | GO:0006468           | protein amino acid phosphorylation                         |    |
| module_581          | GO:0006793           | phosphorus metabolic process                               |    |
| module_581          | GO:0006796           | phosphate metabolic process                                |    |
| module_581          | GO:0016310           | phosphorylation                                            |    |
| module_589          | GO:0019252           | starch biosynthetic process                                |    |
| module_589          | GO:0005982           | starch metabolic process                                   |    |
| module_589          | GO:0010021           | amylopectin biosynthetic process                           |    |
| module_592          | GO:0006468           | protein amino acid phosphorylation                         |    |
| module_592          | GO:0006793           | phosphorus metabolic process                               |    |
| module_592          | GO:0006796           | phosphate metabolic process                                |    |
| module_592          | GO:0016310           | phosphorylation                                            |    |
| module_592          | GO:0043412           | macromolecule modification                                 |    |
| module_603          | GO:0030244           | cellulose biosynthetic process                             |    |
| module_603          | GO:0009250           | glucan biosynthetic process                                |    |
| module_603          | GO:0030243           | cellulose metabolic process                                |    |
| module_606          | GO:0006465           | signal peptide processing                                  |    |
| module_606          | GO:0006518           | peptide metabolic process                                  |    |
| module_606          | GO:0016485           | protein processing                                         |    |
| module_606          | GO:0051604           | protein maturation                                         |    |
| module_606          | GO:0051605           | protein maturation by peptide bond cleavage                |    |
| module_86           | GO:0006119           | oxidative phosphorylation                                  |    |
| module_94           | GO:0005986           | sucrose biosynthetic process                               |    |
| module_94           | GO:0005984           | disaccharide metabolic process                             |    |
| module_94           | GO:0005985           | sucrose metabolic process                                  |    |
| module_94           | GO:0016137           | glycoside metabolic process                                |    |
| module_94           | GO:0016138           | glycoside biosynthetic process                             |    |
| module_94           | GO:0034637           | cellular carbohydrate biosynthetic process                 |    |
| module_94           | GO:0046351           | disaccharide biosynthetic process                          |    |
| Slim id: GO:0008283 | cell proliferation   |                                                            | 1  |
| module_553          | GO:0008283           | cell proliferation                                         |    |
| Slim id: GO:0009056 | catabolic process    |                                                            | 22 |
| module_259          | GO:0006511           | ubiquitin-dependent protein catabolic process              |    |
| module_259          | GO:0009056           | catabolic process                                          |    |
| module_259          | GO:0009057           | macromolecule catabolic process                            |    |
| module_259          | GO:0019941           | modification-dependent protein catabolic process           |    |
| module_259          | GO:0030163           | protein catabolic process                                  |    |
| module_259          | GO:0043632           | modification-dependent macromolecule catabolic process     |    |
| module_259          | GO:0044248           | cellular catabolic process                                 |    |
| module_259          | GO:0044257           | cellular protein catabolic process                         |    |
| module_259          | GO:0044265           | cellular macromolecule catabolic process                   |    |
| module_259          | GO:0051603           | proteolysis involved in cellular protein catabolic process |    |
| module_272          | GO:0006096           | glycolysis                                                 |    |
| module_296          | GO:0006552           | leucine catabolic process                                  |    |
| module_413          | GO:0005998           | xylulose catabolic process                                 |    |
| module_413          | GO:0016052           | carbohydrate catabolic process                             |    |
| module_413          | GO:0019323           | pentose catabolic process                                  |    |
| module_413          | GO:0044275           | cellular carbohydrate catabolic process                    |    |
| module_413          | GO:0044282           | small molecule catabolic process                           |    |
| module_413          | GO:0046164           | alcohol catabolic process                                  |    |
| module_413          | GO:0046365           | monosaccharide catabolic process                           |    |
| module_502          | GO:0046274           | lignin catabolic process                                   |    |
| module_502          | GO:0046271           | phenylpropanoid catabolic process                          |    |
| module_540          | GO:0006552           | leucine catabolic process                                  |    |
| Slim id: GO:0009058 | biosynthetic process |                                                            | 99 |
| module_118          | GO:0019375           | galactolipid biosynthetic process                          |    |
| module_118          | GO:0009247           | glycolipid biosynthetic process                            |    |
| module_118          | GO:0046467           | membrane lipid biosynthetic process                        |    |
| module_12           | GO:0006556           | S-adenosylmethionine biosynthetic process                  |    |
| module_12           | GO:0000097           | sulfur amino acid biosynthetic process                     |    |
| module_125          | GO:0009853           | photorespiration                                           |    |
| module_125          | GO:0043094           | cellular metabolic compound salvage                        |    |
| module_142          | GO:0006656           | phosphatidylcholine biosynthetic process                   |    |
| module_142          | GO:0008654           | phospholipid biosynthetic process                          |    |
| module_142          | GO:0045017           | glycerolipid biosynthetic process                          |    |
| module_142          | GO:0046474           | glycerophospholipid biosynthetic process                   |    |
| module_170          | GO:0019253           | reductive pentose-phosphate cycle                          |    |
| module_170          | GO:0019685           | photosynthesis, dark reaction                              |    |
| module_202          | GO:0033014           | tetrapyrrole biosynthetic process                          |    |
| module_236          | GO:0009699           | phenylpropanoid biosynthetic process                       |    |
| module_236          | GO:0009813           | flavonoid biosynthetic process                             |    |
| module_236          | GO:0019438           | aromatic compound biosynthetic process                     |    |
| module_236          | GO:0042398           | cellular amino acid derivative biosynthetic process        |    |
| module_237          | GO:0009059           | macromolecule biosynthetic process                         |    |
| module_237          | GO:0034645           | cellular macromolecule biosynthetic process                |    |
| module_249          | GO:0019438           | aromatic compound biosynthetic process                     |    |
| module_265          | GO:0006633           | fatty acid biosynthetic process                            |    |
| module_265          | GO:0008610           | lipid biosynthetic process                                 |    |
| module_265          | GO:0016053           | organic acid biosynthetic process                          |    |
| module_265          | GO:0046394           | carboxylic acid biosynthetic process                       |    |
| module_266          | GO:0006355           | regulation of transcription, DNA-dependent                 |    |
| module_290          | GO:0034645           | cellular macromolecule biosynthetic process                |    |
| module_290          | GO:0009059           | macromolecule biosynthetic process                         |    |
| module_290          | GO:0006414           | translational elongation                                   |    |
| module_290          | GO:0009058           | biosynthetic process                                       |    |
| module_290          | GO:0044249           | cellular biosynthetic process                              |    |
| module_313          | GO:0009058           | biosynthetic process                                       |    |
| module_313          | GO:0009059           | macromolecule biosynthetic process                         |    |
| module_313          | GO:0034645           | cellular macromolecule biosynthetic process                |    |
| module_313          | GO:0044249           | cellular biosynthetic process                              |    |
| module_315          | GO:0010025           | wax biosynthetic process                                   |    |
| module_355          | GO:0010289           | homogalacturonan biosynthetic process                      |    |
| module_355          | GO:0000271           | polysaccharide biosynthetic process                        |    |
| module_355          | GO:0016051           | carbohydrate biosynthetic process                          |    |
| module_355          | GO:0033692           | cellular polysaccharide biosynthetic process               |    |
| module_355          | GO:0034637           | cellular carbohydrate biosynthetic process                 |    |
| module_355          | GO:0045489           | pectin biosynthetic process                                |    |
| module_380          | GO:0009058           | biosynthetic process                                       |    |
| module_380          | GO:0009059           | macromolecule biosynthetic process                         |    |
| module_380          | GO:0034645           | cellular macromolecule biosynthetic process                |    |
| module_380          | GO:0044249           | cellular biosynthetic process                              |    |

|                     |                                 |                                                                                      |    |
|---------------------|---------------------------------|--------------------------------------------------------------------------------------|----|
| module_41           | GO:0009058                      | biosynthetic process                                                                 |    |
| module_41           | GO:0009059                      | macromolecule biosynthetic process                                                   |    |
| module_41           | GO:0034645                      | cellular macromolecule biosynthetic process                                          |    |
| module_41           | GO:0044249                      | cellular biosynthetic process                                                        |    |
| module_410          | GO:0009058                      | biosynthetic process                                                                 |    |
| module_410          | GO:0009059                      | macromolecule biosynthetic process                                                   |    |
| module_410          | GO:0034645                      | cellular macromolecule biosynthetic process                                          |    |
| module_410          | GO:0044249                      | cellular biosynthetic process                                                        |    |
| module_419          | GO:0051555                      | flavonol biosynthetic process                                                        |    |
| module_419          | GO:0051553                      | flavone biosynthetic process                                                         |    |
| module_456          | GO:0045337                      | farnesyl diphosphate biosynthetic process                                            |    |
| module_456          | GO:0016091                      | prenol biosynthetic process                                                          |    |
| module_456          | GO:0016094                      | polyprenol biosynthetic process                                                      |    |
| module_467          | GO:0006779                      | porphyrin biosynthetic process                                                       |    |
| module_467          | GO:0033014                      | tetrapyrrole biosynthetic process                                                    |    |
| module_476          | GO:0010143                      | cutin biosynthetic process                                                           |    |
| module_480          | GO:0009058                      | biosynthetic process                                                                 |    |
| module_480          | GO:0009059                      | macromolecule biosynthetic process                                                   |    |
| module_480          | GO:0034645                      | cellular macromolecule biosynthetic process                                          |    |
| module_480          | GO:0044249                      | cellular biosynthetic process                                                        |    |
| module_521          | GO:0010253                      | UDP-rhamnose biosynthetic process                                                    |    |
| module_521          | GO:0009226                      | nucleotide-sugar biosynthetic process                                                |    |
| module_521          | GO:0019300                      | rhamnose biosynthetic process                                                        |    |
| module_521          | GO:0019319                      | hexose biosynthetic process                                                          |    |
| module_529          | GO:0009058                      | biosynthetic process                                                                 |    |
| module_529          | GO:0009059                      | macromolecule biosynthetic process                                                   |    |
| module_529          | GO:0034645                      | cellular macromolecule biosynthetic process                                          |    |
| module_529          | GO:0044249                      | cellular biosynthetic process                                                        |    |
| module_548          | GO:0030244                      | cellulose biosynthetic process                                                       |    |
| module_553          | GO:0006268                      | DNA unwinding involved in replication                                                |    |
| module_553          | GO:0006270                      | DNA-dependent DNA replication initiation                                             |    |
| module_553          | GO:0006260                      | DNA replication                                                                      |    |
| module_553          | GO:0006261                      | DNA-dependent DNA replication                                                        |    |
| module_553          | GO:0009059                      | macromolecule biosynthetic process                                                   |    |
| module_553          | GO:0034645                      | cellular macromolecule biosynthetic process                                          |    |
| module_554          | GO:0006260                      | DNA replication                                                                      |    |
| module_557          | GO:0030418                      | nicotianamine biosynthetic process                                                   |    |
| module_563          | GO:0030244                      | cellulose biosynthetic process                                                       |    |
| module_563          | GO:0000271                      | polysaccharide biosynthetic process                                                  |    |
| module_563          | GO:0033692                      | cellular polysaccharide biosynthetic process                                         |    |
| module_563          | GO:0034637                      | cellular carbohydrate biosynthetic process                                           |    |
| module_569          | GO:0009059                      | macromolecule biosynthetic process                                                   |    |
| module_569          | GO:0034645                      | cellular macromolecule biosynthetic process                                          |    |
| module_589          | GO:0019252                      | starch biosynthetic process                                                          |    |
| module_589          | GO:0010021                      | amylopectin biosynthetic process                                                     |    |
| module_603          | GO:0030244                      | cellulose biosynthetic process                                                       |    |
| module_603          | GO:0009250                      | glucan biosynthetic process                                                          |    |
| module_94           | GO:0005986                      | sucrose biosynthetic process                                                         |    |
| module_94           | GO:0009312                      | oligosaccharide biosynthetic process                                                 |    |
| module_94           | GO:0016051                      | carbohydrate biosynthetic process                                                    |    |
| module_94           | GO:0016138                      | glycoside biosynthetic process                                                       |    |
| module_94           | GO:0034637                      | cellular carbohydrate biosynthetic process                                           |    |
| module_94           | GO:0046351                      | disaccharide biosynthetic process                                                    |    |
| Slim id: GO:0009605 | response to external stimulus   |                                                                                      | 3  |
| module_356          | GO:0009652                      | thigmotropism                                                                        |    |
| module_356          | GO:0009606                      | tropism                                                                              |    |
| module_356          | GO:0009612                      | response to mechanical stimulus                                                      |    |
| Slim id: GO:0009628 | response to abiotic stimulus    |                                                                                      | 25 |
| module_236          | GO:0009411                      | response to UV                                                                       |    |
| module_277          | GO:0009408                      | response to heat                                                                     |    |
| module_277          | GO:0009644                      | response to high light intensity                                                     |    |
| module_277          | GO:0009266                      | response to temperature stimulus                                                     |    |
| module_277          | GO:0009628                      | response to abiotic stimulus                                                         |    |
| module_277          | GO:0009642                      | response to light intensity                                                          |    |
| module_317          | GO:0010114                      | response to red light                                                                |    |
| module_317          | GO:0010218                      | response to far red light                                                            |    |
| module_317          | GO:0009637                      | response to blue light                                                               |    |
| module_343          | GO:0009408                      | response to heat                                                                     |    |
| module_343          | GO:0009266                      | response to temperature stimulus                                                     |    |
| module_343          | GO:0009628                      | response to abiotic stimulus                                                         |    |
| module_356          | GO:0009652                      | thigmotropism                                                                        |    |
| module_356          | GO:0009612                      | response to mechanical stimulus                                                      |    |
| module_403          | GO:0010201                      | response to continuous far red light stimulus by the high-irradiance response system |    |
| module_403          | GO:0010203                      | response to very low fluence red light stimulus                                      |    |
| module_403          | GO:0010161                      | red light signaling pathway                                                          |    |
| module_403          | GO:0055122                      | response to very low light intensity stimulus                                        |    |
| module_403          | GO:0071491                      | cellular response to red light                                                       |    |
| module_406          | GO:0009631                      | cold acclimation                                                                     |    |
| module_406          | GO:0009414                      | response to water deprivation                                                        |    |
| module_406          | GO:0009415                      | response to water                                                                    |    |
| module_530          | GO:0009644                      | response to high light intensity                                                     |    |
| module_530          | GO:0009416                      | response to light stimulus                                                           |    |
| module_530          | GO:0009314                      | response to radiation                                                                |    |
| Slim id: GO:0009719 | response to endogenous stimulus |                                                                                      | 3  |
| module_406          | GO:0009961                      | response to 1-aminocyclopropane-1-carboxylic acid                                    |    |
| module_406          | GO:0009737                      | response to abscisic acid stimulus                                                   |    |
| module_72           | GO:0009739                      | response to gibberellin stimulus                                                     |    |
| Slim id: GO:0009790 | embryo development              |                                                                                      | 1  |
| module_406          | GO:0009790                      | embryo development                                                                   |    |
| Slim id: GO:0016043 | cellular component organization |                                                                                      | 56 |
| module_167          | GO:0006334                      | nucleosome assembly                                                                  |    |
| module_167          | GO:0006323                      | DNA packaging                                                                        |    |
| module_167          | GO:0016043                      | cellular component organization                                                      |    |
| module_167          | GO:0022607                      | cellular component assembly                                                          |    |
| module_167          | GO:0031497                      | chromatin assembly                                                                   |    |
| module_167          | GO:0034621                      | cellular macromolecular complex subunit organization                                 |    |
| module_167          | GO:0034622                      | cellular macromolecular complex assembly                                             |    |
| module_167          | GO:0034728                      | nucleosome organization                                                              |    |
| module_167          | GO:0043933                      | macromolecular complex subunit organization                                          |    |
| module_167          | GO:0065003                      | macromolecular complex assembly                                                      |    |
| module_167          | GO:0065004                      | protein-DNA complex assembly                                                         |    |
| module_286          | GO:0006334                      | nucleosome assembly                                                                  |    |
| module_286          | GO:0006323                      | DNA packaging                                                                        |    |
| module_286          | GO:0016043                      | cellular component organization                                                      |    |
| module_286          | GO:0022607                      | cellular component assembly                                                          |    |
| module_286          | GO:0031497                      | chromatin assembly                                                                   |    |
| module_286          | GO:0034621                      | cellular macromolecular complex subunit organization                                 |    |
| module_286          | GO:0034622                      | cellular macromolecular complex assembly                                             |    |
| module_286          | GO:0034728                      | nucleosome organization                                                              |    |
| module_286          | GO:0043933                      | macromolecular complex subunit organization                                          |    |
| module_286          | GO:0065003                      | macromolecular complex assembly                                                      |    |
| module_286          | GO:0065004                      | protein-DNA complex assembly                                                         |    |

|                     |                                  |                                                               |    |
|---------------------|----------------------------------|---------------------------------------------------------------|----|
| module_400          | GO:0006334                       | nucleosome assembly                                           |    |
| module_400          | GO:0006323                       | DNA packaging                                                 |    |
| module_400          | GO:0022607                       | cellular component assembly                                   |    |
| module_400          | GO:0031497                       | chromatin assembly                                            |    |
| module_400          | GO:0034621                       | cellular macromolecular complex subunit organization          |    |
| module_400          | GO:0034622                       | cellular macromolecular complex assembly                      |    |
| module_400          | GO:0034728                       | nucleosome organization                                       |    |
| module_400          | GO:0043933                       | macromolecular complex subunit organization                   |    |
| module_400          | GO:0065003                       | macromolecular complex assembly                               |    |
| module_400          | GO:0065004                       | protein–DNA complex assembly                                  |    |
| module_408          | GO:0051225                       | spindle assembly                                              |    |
| module_56           | GO:0006334                       | nucleosome assembly                                           |    |
| module_56           | GO:0006323                       | DNA packaging                                                 |    |
| module_56           | GO:0016043                       | cellular component organization                               |    |
| module_56           | GO:0022607                       | cellular component assembly                                   |    |
| module_56           | GO:0031497                       | chromatin assembly                                            |    |
| module_56           | GO:0034621                       | cellular macromolecular complex subunit organization          |    |
| module_56           | GO:0034622                       | cellular macromolecular complex assembly                      |    |
| module_56           | GO:0034728                       | nucleosome organization                                       |    |
| module_56           | GO:0043933                       | macromolecular complex subunit organization                   |    |
| module_56           | GO:0065003                       | macromolecular complex assembly                               |    |
| module_56           | GO:0065004                       | protein–DNA complex assembly                                  |    |
| module_598          | GO:0006334                       | nucleosome assembly                                           |    |
| module_598          | GO:0006323                       | DNA packaging                                                 |    |
| module_598          | GO:0016043                       | cellular component organization                               |    |
| module_598          | GO:0022607                       | cellular component assembly                                   |    |
| module_598          | GO:0031497                       | chromatin assembly                                            |    |
| module_598          | GO:0034621                       | cellular macromolecular complex subunit organization          |    |
| module_598          | GO:0034622                       | cellular macromolecular complex assembly                      |    |
| module_598          | GO:0034728                       | nucleosome organization                                       |    |
| module_598          | GO:0043933                       | macromolecular complex subunit organization                   |    |
| module_598          | GO:0065003                       | macromolecular complex assembly                               |    |
| module_598          | GO:0065004                       | protein–DNA complex assembly                                  |    |
| module_67           | GO:0008535                       | respiratory chain complex IV assembly                         |    |
| Slim id: GO:0019538 | protein metabolic process        |                                                               | 31 |
| module_259          | GO:0006511                       | ubiquitin–dependent protein catabolic process                 |    |
| module_259          | GO:0006508                       | proteolysis                                                   |    |
| module_259          | GO:0019941                       | modification–dependent protein catabolic process              |    |
| module_259          | GO:0030163                       | protein catabolic process                                     |    |
| module_259          | GO:0044257                       | cellular protein catabolic process                            |    |
| module_259          | GO:0051603                       | proteolysis involved in cellular protein catabolic process    |    |
| module_277          | GO:0006457                       | protein folding                                               |    |
| module_290          | GO:0019538                       | protein metabolic process                                     |    |
| module_290          | GO:0044267                       | cellular protein metabolic process                            |    |
| module_313          | GO:0044267                       | cellular protein metabolic process                            |    |
| module_313          | GO:0019538                       | protein metabolic process                                     |    |
| module_380          | GO:0019538                       | protein metabolic process                                     |    |
| module_380          | GO:0044267                       | cellular protein metabolic process                            |    |
| module_41           | GO:0019538                       | protein metabolic process                                     |    |
| module_41           | GO:0044267                       | cellular protein metabolic process                            |    |
| module_410          | GO:0019538                       | protein metabolic process                                     |    |
| module_410          | GO:0044267                       | cellular protein metabolic process                            |    |
| module_467          | GO:0006457                       | protein folding                                               |    |
| module_467          | GO:0044267                       | cellular protein metabolic process                            |    |
| module_480          | GO:0019538                       | protein metabolic process                                     |    |
| module_480          | GO:0044267                       | cellular protein metabolic process                            |    |
| module_529          | GO:0019538                       | protein metabolic process                                     |    |
| module_529          | GO:0044267                       | cellular protein metabolic process                            |    |
| module_567          | GO:0019538                       | protein metabolic process                                     |    |
| module_567          | GO:0044267                       | cellular protein metabolic process                            |    |
| module_569          | GO:0019538                       | protein metabolic process                                     |    |
| module_569          | GO:0044267                       | cellular protein metabolic process                            |    |
| module_606          | GO:0006465                       | signal peptide processing                                     |    |
| module_606          | GO:0016485                       | protein processing                                            |    |
| module_606          | GO:0051604                       | protein maturation                                            |    |
| module_606          | GO:0051605                       | protein maturation by peptide bond cleavage                   |    |
| Slim id: GO:0019725 | cellular homeostasis             |                                                               | 8  |
| module_128          | GO:0006878                       | cellular copper ion homeostasis                               |    |
| module_128          | GO:0030005                       | cellular di-, tri-valent inorganic cation homeostasis         |    |
| module_357          | GO:0030002                       | cellular anion homeostasis                                    |    |
| module_357          | GO:0030319                       | cellular di-, tri-valent inorganic anion homeostasis          |    |
| module_357          | GO:0030643                       | cellular phosphate ion homeostasis                            |    |
| module_538          | GO:0051453                       | regulation of intracellular pH                                |    |
| module_538          | GO:0030004                       | cellular monovalent inorganic cation homeostasis              |    |
| module_538          | GO:0030641                       | regulation of cellular pH                                     |    |
| Slim id: GO:0019748 | secondary metabolic process      |                                                               | 13 |
| module_236          | GO:0009698                       | phenylpropanoid metabolic process                             |    |
| module_236          | GO:0009699                       | phenylpropanoid biosynthetic process                          |    |
| module_236          | GO:0009812                       | flavonoid metabolic process                                   |    |
| module_236          | GO:0009813                       | flavonoid biosynthetic process                                |    |
| module_236          | GO:0019748                       | secondary metabolic process                                   |    |
| module_249          | GO:0009698                       | phenylpropanoid metabolic process                             |    |
| module_419          | GO:0051555                       | flavonol biosynthetic process                                 |    |
| module_419          | GO:0051552                       | flavone metabolic process                                     |    |
| module_419          | GO:0051553                       | flavone biosynthetic process                                  |    |
| module_419          | GO:0051554                       | flavonol metabolic process                                    |    |
| module_433          | GO:0016119                       | carotene metabolic process                                    |    |
| module_502          | GO:0046274                       | lignin catabolic process                                      |    |
| module_502          | GO:0046271                       | phenylpropanoid catabolic process                             |    |
| Slim id: GO:0030154 | cell differentiation             |                                                               | 1  |
| module_589          | GO:0010444                       | guard mother cell differentiation                             |    |
| Slim id: GO:0044238 | primary metabolic process        |                                                               | 5  |
| module_266          | GO:0006355                       | regulation of transcription, DNA–dependent                    |    |
| module_266          | GO:0051252                       | regulation of RNA metabolic process                           |    |
| module_290          | GO:0044238                       | primary metabolic process                                     |    |
| module_313          | GO:0044238                       | primary metabolic process                                     |    |
| module_410          | GO:0044238                       | primary metabolic process                                     |    |
| Slim id: GO:0050789 | regulation of biological process |                                                               | 8  |
| module_118          | GO:0042550                       | photosystem I stabilization                                   |    |
| module_118          | GO:0010109                       | regulation of photosynthesis                                  |    |
| module_118          | GO:0042548                       | regulation of photosynthesis, light reaction                  |    |
| module_118          | GO:0043467                       | regulation of generation of precursor metabolites and energy  |    |
| module_266          | GO:0006355                       | regulation of transcription, DNA–dependent                    |    |
| module_266          | GO:0051252                       | regulation of RNA metabolic process                           |    |
| module_333          | GO:0009870                       | defense response signaling pathway, resistance gene–dependent |    |
| module_471          | GO:0043086                       | negative regulation of catalytic activity                     |    |
