# Supplementary material for: Global Landscape of a Co-Expressed Gene Network in Barley and its Application to Gene Discovery in Triticeae Crops
Source: PubMed Central journal article supplement — Plant Cell Physiol. 2011 Mar 24;52(5):785–803. doi: 10.1093/pcp/pcr035 (PMC3093127; doi:10.1093/pcp/pcr035), 2011-03-24
Supplement: supp_pcr035_pcp-2011-e-00060-File007.pdf [file supp_pcr035_pcp-2011-e-00060-File007.pdf]

|                  |  |  |  |                 |                 |
|------------------|--|--|--|-----------------|-----------------|
| Contig20310_at   |  |  |  | TC379989 5e-166 | TC208704 0.0    |
| Contig20311_at   |  |  |  | TC387783 1e-33  | TC219544 0.0    |
| Contig20314_at   |  |  |  | TC373400 3e-121 | TC227957 0.0    |
| Contig20316_at   |  |  |  | TC458445 2e-165 | TC232117 0.0    |
| Contig20317_at   |  |  |  | AL816424 2e-137 | TC226945 0.0    |
| Contig20318_at   |  |  |  | TC391306 2e-128 | TC215329 0.0    |
| Contig2031_s_at  |  |  |  | CA643409 7e-34  | TC220928 5e-39  |
| Contig20322_at   |  |  |  | TC444165 7e-168 | TC210059 0.0    |
| Contig20324_at   |  |  |  | TC405587 3e-26  | TC198661 7e-28  |
| Contig20324_s_at |  |  |  | TC405587 0.0    | TC198661 0.0    |
| Contig20326_at   |  |  |  | TC422091 7e-38  | TC196972 0.0    |
| Contig20328_at   |  |  |  | CJ608295 2e-97  | CA000749 0.0    |
| Contig20333_at   |  |  |  | TC374181 3e-96  | TC197624 0.0    |
| Contig20334_at   |  |  |  |                 | TC224249 0.0    |
| Contig20341_at   |  |  |  |                 | TC216036 0.0    |
| Contig20342_at   |  |  |  |                 | TC233765 0.0    |
| Contig20343_at   |  |  |  |                 | TC209004 0.0    |
| Contig20345_at   |  |  |  |                 | TC233163 0.0    |
| Contig20346_at   |  |  |  |                 | TC215049 0.0    |
| Contig20348_at   |  |  |  |                 | TC214648 0.0    |
| Contig2034_s_at  |  |  |  |                 | TC226409 3e-167 |
| Contig20352_at   |  |  |  |                 | TC206004 0.0    |
| Contig20356_at   |  |  |  |                 | TC211532 0.0    |
| Contig20357_at   |  |  |  |                 | TC210481 0.0    |
| Contig20358_at   |  |  |  |                 | TC212612 0.0    |
| Contig20359_at   |  |  |  |                 | TC215561 0.0    |
| Contig20361_at   |  |  |  |                 | TC211927 0.0    |
| Contig20363_at   |  |  |  |                 | TC216622 0.0    |
| Contig20364_at   |  |  |  |                 | TC205932 0.0    |
| Contig20366_at   |  |  |  |                 | TC206161 0.0    |
| Contig20369_at   |  |  |  |                 | TC218769 0.0    |
| Contig2036_s_at  |  |  |  |                 | TC195795 0.0    |
| Contig20371_at   |  |  |  |                 | TC213215 0.0    |
| Contig20372_at   |  |  |  |                 | TC204486 0.0    |
| Contig20373_at   |  |  |  |                 | TC227812 0.0    |
| Contig20376_at   |  |  |  |                 | TC218174 0.0    |
| Contig20381_at   |  |  |  |                 | TC212733 0.0    |
| Contig20382_at   |  |  |  |                 | TC208236 0.0    |
| Contig20383_at   |  |  |  |                 | TC212501 4e-146 |
| Contig20387_at   |  |  |  |                 | TC199520 0.0    |
| Contig20388_at   |  |  |  |                 | TC229282 0.0    |
| Contig20389_at   |  |  |  |                 | TC215601 0.0    |
| Contig20393_at   |  |  |  |                 | TC206351 0.0    |
| Contig20394_at   |  |  |  |                 | TC210903 0.0    |
| Contig20396_at   |  |  |  |                 | TC206318 0.0    |
| Contig20397_at   |  |  |  |                 | TC223862 0.0    |
| Contig20398_at   |  |  |  |                 | TC203137 0.0    |
| Contig203_at     |  |  |  |                 | TC217397 6e-52  |
| Contig20400_at   |  |  |  |                 | CA033006 0.0    |
| Contig20401_at   |  |  |  |                 | TC228098 0.0    |
| Contig20402_at   |  |  |  |                 | TC212430 0.0    |
| Contig20404_at   |  |  |  |                 | TC210814 0.0    |
| Contig20405_at   |  |  |  |                 | TC214294 0.0    |
| Contig20407_at   |  |  |  |                 | BU999431 0.0    |
| Contig20409_at   |  |  |  |                 | TC199701 7e-171 |
| Contig20411_at   |  |  |  |                 | TC211905 0.0    |
| Contig20415_at   |  |  |  |                 | TC217710 0.0    |
| Contig20416_at   |  |  |  |                 | TC216493 0.0    |
| Contig20418_at   |  |  |  |                 | TC196867 1e-134 |
| Contig2041_at    |  |  |  |                 | TC203040 0.0    |
| Contig2041_x_at  |  |  |  |                 | TC203040 0.0    |
| Contig20423_at   |  |  |  |                 | TC215441 0.0    |
| Contig20424_at   |  |  |  |                 | TC219259 0.0    |
| Contig20425_at   |  |  |  |                 | TC209448 0.0    |
| Contig20426_at   |  |  |  |                 | TC210437 0.0    |
| Contig20427_at   |  |  |  |                 | TC227146 0.0    |
| Contig20428_at   |  |  |  |                 | TC237300 0.0    |
| Contig20429_at   |  |  |  |                 | TC216507 0.0    |
| Contig20430_at   |  |  |  |                 | TC223099 0.0    |
| Contig20431_at   |  |  |  |                 | TC206356 0.0    |
| Contig20433_at   |  |  |  |                 | TC203125 0.0    |
| Contig20435_at   |  |  |  |                 | TC201120 0.0    |
| Contig20437_at   |  |  |  |                 | TC208443 0.0    |
| Contig20439_at   |  |  |  |                 | TC200801 0.0    |
| Contig2043_s_at  |  |  |  |                 | TC204035 0.0    |
| Contig20441_at   |  |  |  |                 | TC230329 0.0    |
| Contig20442_at   |  |  |  |                 | TC201006 0.0    |
| Contig20443_at   |  |  |  |                 | TC197260 0.0    |
| Contig20448_at   |  |  |  |                 | TC201701 0.0    |
| Contig2044_at    |  |  |  |                 | TC203658 3e-72  |
| Contig20450_at   |  |  |  |                 | AV835790 0.0    |
| Contig20455_at   |  |  |  |                 | TC204433 0.0    |
| Contig20457_at   |  |  |  |                 | BJ477466 1e-42  |
| Contig20462_at   |  |  |  |                 | TC206637 0.0    |
| Contig20464_at   |  |  |  |                 | TC208060 0.0    |
| Contig20465_at   |  |  |  |                 | TC200902 0.0    |
| Contig20468_at   |  |  |  |                 | TC198079 0.0    |
| Contig20469_at   |  |  |  |                 | TC195111 0.0    |
| Contig2046_at    |  |  |  |                 | TC202182 9e-89  |
| Contig20471_at   |  |  |  |                 | TC199641 0.0    |
| Contig20472_at   |  |  |  |                 | TC213186 0.0    |
| Contig20475_at   |  |  |  |                 | TC231215 0.0    |
| Contig20479_at   |  |  |  |                 | TC220129 0.0    |
| Contig2047_s_at  |  |  |  |                 | TC226388 1e-84  |
| Contig20481_at   |  |  |  |                 | TC222877 4e-119 |
| Contig20482_at   |  |  |  |                 | BE558392 0.0    |
| Contig20485_at   |  |  |  |                 | TC207615 0.0    |
| Contig20486_at   |  |  |  |                 | TC207589 0.0    |
| Contig20487_at   |  |  |  |                 | TC228983 0.0    |
| Contig20488_at   |  |  |  |                 | TC197045 0.0    |
| Contig2048_at    |  |  |  |                 | TC219679 0.0    |
| Contig20490_at   |  |  |  |                 | TC220502 0.0    |
| Contig20492_at   |  |  |  |                 | TC202658 0.0    |
| Contig20495_at   |  |  |  |                 | TC206154 0.0    |
| Contig20499_at   |  |  |  |                 | TC202209 0.0    |
| Contig204_s_at   |  |  |  |                 | TC201144 0.0    |
| Contig20503_at   |  |  |  |                 | TC198341 0.0    |
| Contig20504_at   |  |  |  |                 | TC221952 0.0    |
| Contig20506_at   |  |  |  |                 | TC229599 0.0    |
| Contig2050_at    |  |  |  |                 | AJ434767 2e-55  |
| Contig2050_x_at  |  |  |  |                 | TC219679 9e-118 |
| Contig20510_at   |  |  |  |                 | TC216243 0.0    |
| Contig20511_at   |  |  |  |                 | TC206965 0.0    |
| Contig20512_at   |  |  |  |                 | TC199042 0.0    |
| Contig20512_s_at |  |  |  |                 | TC199042 0.0    |
| Contig20513_at   |  |  |  |                 | TC224550 0.0    |
| Contig20514_at   |  |  |  |                 | TC204601 0.0    |



















































































































































|                       |                      |                                 |                   |                 |                 |
|-----------------------|----------------------|---------------------------------|-------------------|-----------------|-----------------|
| Contig9976_at         | Bradi2g10280.1 5e-53 | Os01g0271400 Os01g0271400 9e-47 | AT4G17040.1 7e-38 | TC398677 0.0    | TC205887 0.0    |
| Contig9977_at         | Bradi3g06630.1 2e-09 | Os02g0190900 AK1111037 2e-08    |                   | TC392697 1e-57  | TC200012 0.0    |
| Contig9978_at         | Bradi2g02870.1 4e-35 | Os01g0143300 AK108438 1e-31     | AT5G02050.1 6e-25 | TC431691 2e-152 | TC197365 0.0    |
| Contig997_x_at        |                      |                                 |                   | TC377532 4e-14  | TC200485 4e-24  |
| Contig9980_at         |                      |                                 |                   | CK196507 1e-23  | TC202225 0.0    |
| Contig9981_at         | Bradi4g30530.1 4e-71 | Os09g0422000 AK101900 3e-64     | AT5G48930.1 1e-19 | TC403549 0.0    | TC206838 0.0    |
| Contig9982_at         |                      |                                 |                   | TC391892 1e-11  | TC216552 0.0    |
| Contig9984_at         | Bradi2g50960.1 9e-17 | Os01g0766600 AK103570 2e-14     | AT5G65910.1 7e-06 | TC398227 3e-71  | TC198884 0.0    |
| Contig9986_s_at       | Bradi4g30720.1 1e-62 | Os09g0426000 AK073366 7e-63     | AT4G30420.1 5e-26 | CA648270 3e-157 | CA018552 0.0    |
| Contig9987_at         |                      |                                 |                   | TC449633 1e-24  | TC208234 2e-52  |
| Contig9988_at         | Bradi1g74870.1 7e-54 | Os03g0132000 AK105769 4e-36     | AT4G05160.1 9e-48 | TC372893 3e-173 | TC197342 0.0    |
| Contig9989_at         | Bradi2g26770.1 9e-51 | Os05g0382900 AK061728 7e-49     | AT2G38760.1 4e-29 | TC400092 1e-12  | TC222705 0.0    |
| Contig998_s_at        | Bradi1g66590.1 1e-08 | Os01g0840100 016-033-C09 7e-07  | AT3G12580.1 8e-06 | TC370504 2e-31  | TC206981 5e-39  |
| Contig998_x_at        | Bradi1g66590.1 1e-46 | Os03g0276500 AK109474 1e-44     | AT3G12580.1 1e-41 | TC370504 1e-119 | TC206981 8e-137 |
| Contig9990_at         | Bradi3g24750.1 3e-73 | Os10g0407000 AK101494 4e-68     | AT3G29090.1 2e-53 | TC405412 0.0    | TC198725 0.0    |
| Contig9991_at         | Bradi1g14230.1 4e-47 | Os03g0633800 AK073044 2e-42     | AT4G29080.1 2e-26 | TC373385 0.0    | TC213076 0.0    |
| Contig9993_at         | Bradi4g04270.1 7e-32 | Os12g0570000 AY652589 2e-26     | AT3G46510.1 8e-07 | TC457982 1e-169 | TC196792 0.0    |
| Contig9994_at         | Bradi1g46550.1 1e-89 | AK065642 AK065642 4e-84         | AT2G26280.1 1e-63 | TC389951 0.0    | TC235200 0.0    |
| Contig9995_at         | Bradi1g71810.2 2e-53 | Os03g0191000 AK066651 2e-48     | AT5G64220.1 2e-19 | TC426885 0.0    | TC216393 0.0    |
| Contig9996_at         |                      |                                 |                   |                 | TC213810 0.0    |
| Contig9998_at         |                      |                                 |                   |                 | TC220579 0.0    |
| Contig9_at            |                      |                                 |                   |                 | AW982907 1e-12  |
| Contig9_x_at          |                      |                                 |                   | TC413795 3e-15  | AW982907 5e-33  |
| D10057_at             |                      |                                 |                   |                 | TC225048 9e-95  |
| D37796_at             |                      |                                 |                   |                 |                 |
| Dhn10(Morex)_s_at     | Bradi3g43870.1 2e-19 | U60097 U60097 5e-13             | AT5G66400.2 5e-09 | TC426104 5e-86  | TC233376 0.0    |
| Dhn12(Morex)_at       |                      |                                 |                   |                 |                 |
| EBan01_SQ002_F13_at   |                      |                                 |                   | TC412193 2e-13  | TC236185 0.0    |
| EBan01_SQ002_J20_at   | Bradi3g07660.1 2e-37 | Os02g0204400 Os02g0204400 1e-30 | AT3G15620.1 6e-25 | TC389233 3e-59  | BM442235 0.0    |
| EBan01_SQ002_N10_x_at |                      |                                 |                   |                 | BM442310 1e-39  |
| EBan01_SQ003_A15_at   |                      |                                 |                   | TC454275 8e-38  | BM442383 0.0    |
| EBan01_SQ003_E13_at   |                      |                                 |                   |                 | BM442472 0.0    |
| EBan01_SQ003_F14_at   |                      |                                 |                   | TC375139 3e-46  | TC231519 0.0    |
| EBan01_SQ003_J01_at   | Bradi2g05080.1 7e-07 | Os02g0195900 Os02g0195900 1e-06 |                   | TC427679 8e-121 | TC222315 0.0    |
| EBan01_SQ003_M14_at   |                      |                                 |                   |                 | BM442654 4e-116 |
| EBan01_SQ004_G02_at   |                      |                                 |                   | GH727670 3e-17  | BQ753477 2e-105 |
| EBan01_SQ004_H17_at   | Bradi3g60370.1 1e-42 | Os06g0729400 AK059502 1e-24     | AT2G30810.1 3e-15 | CJ685095 5e-101 | BQ753514 0.0    |
| EBan01_SQ004_O17_at   | Bradi2g32940.1 5e-21 | Os01g0201400 AK070397 1e-16     | AT3G16570.1 2e-12 | CA741325 2e-65  | BQ753674 0.0    |
| EBan01_SQ005_A15_at   |                      |                                 |                   |                 | TC237793 0.0    |
| EBan01_SQ005_B08_at   | Bradi4g24990.1 2e-21 | Os11g0158200 Os11g0158200 3e-21 | AT3G44190.1 4e-09 |                 | TC209260 0.0    |
| EBan01_SQ005_B22_s_at |                      | Os09g0404900 Os09g0404900 2e-15 |                   |                 | TC199025 0.0    |
| EBan01_SQ005_E01_at   | Bradi1g06010.1 9e-06 | Os03g0648500 AK107766 5e-20     |                   |                 | BQ764162 0.0    |
| EBan01_SQ005_I10_at   | Bradi2g42990.1 2e-18 | Os01g0605700 AK099440 1e-13     | AT3G28007.1 2e-11 | TC371533 1e-17  | BQ764266 0.0    |
| EBan01_SQ005_L09_at   |                      |                                 |                   | BJ249314 5e-13  | BQ764282 1e-125 |
| EBan01_SQ005_L18_at   |                      |                                 |                   |                 | BQ764371 0.0    |
| EBan01_SQ005_N15_at   | Bradi2g27890.1 5e-37 | Os05g0362600 Os05g0362600 1e-23 | AT1G02820.1 7e-08 | TC413590 3e-90  | TC206808 0.0    |
| EBca01_SQ004_P03_at   |                      |                                 |                   |                 | TC199841 5e-20  |
| EBca01_SQ004_P03_s_at |                      |                                 |                   | TC373811 5e-30  | TC199841 5e-68  |
| EBca01_SQ004_P03_x_at |                      |                                 |                   | CA642247 6e-27  | TC199841 2e-61  |
| EBca01_SQ005_D03_at   |                      | Os01g0238800 AK062940 2e-06     |                   | TC431388 2e-177 | BQ764831 0.0    |
| EBca01_SQ005_I21_at   |                      | Os01g0655200 Os01g0655200 2e-09 |                   |                 | BQ765121 0.0    |
| EBca01_SQ005_O17_at   |                      |                                 |                   | CA641222 5e-79  | BQ765068 0.0    |
| EBed01_SQ002_E13_at   |                      |                                 |                   |                 | BM368136 4e-62  |
| EBed01_SQ002_G15_at   |                      |                                 |                   | TC385791 3e-31  | BM368186 4e-62  |
| EBed01_SQ002_G15_s_at |                      |                                 |                   | CK211233 3e-26  | TC222509 5e-29  |
| EBed01_SQ002_J04_at   |                      |                                 |                   | TC408330 5e-19  | TC222754 8e-31  |
| EBed01_SQ002_J19_at   |                      |                                 |                   |                 |                 |
| EBed01_SQ002_L05_s_at |                      |                                 |                   |                 | TC215624 6e-35  |
| EBed01_SQ002_L24_at   |                      |                                 |                   |                 | TC199022 2e-19  |
| EBed01_SQ002_N06_at   |                      |                                 |                   | TC376128 6e-15  | TC216376 4e-94  |
| EBed01_SQ002_N21_at   |                      |                                 |                   |                 | BM368337 4e-65  |
| EBed01_SQ002_O23_s_at |                      |                                 |                   |                 | TC229919 2e-34  |
| EBed01_SQ003_C19_at   |                      | Os10g0345900 AK120983 2e-06     |                   | CV763680 6e-25  | TC222010 7e-146 |
| EBed01_SQ003_G02_at   |                      |                                 |                   | TC434126 6e-19  | BQ754636 5e-134 |
| EBed01_SQ003_J02_at   |                      |                                 |                   | TC441189 2e-40  | BQ754700 5e-29  |
| EBed01_SQ003_K15_at   |                      |                                 |                   |                 | BQ754733 2e-158 |
| EBed01_SQ003_L20_s_at |                      |                                 |                   | BQ170780 1e-66  | TC197925 2e-99  |
| EBed02_SQ002_A05_at   |                      |                                 |                   | TC373116 7e-67  | BM440957 3e-148 |
| EBed02_SQ002_A09_at   |                      |                                 |                   | TC437570 3e-70  | BM440961 8e-70  |
| EBed02_SQ002_E13_x_at |                      |                                 |                   | TC391480 3e-13  | TC233256 1e-135 |
| EBed02_SQ002_E18_s_at |                      |                                 |                   | CD920859 9e-49  | TC220424 9e-95  |
| EBed02_SQ002_G09_at   |                      |                                 |                   | TC383107 2e-42  | BM441090 3e-179 |
| EBed02_SQ002_H13_x_at |                      |                                 |                   |                 | TC195989 2e-29  |
| EBed02_SQ002_H23_s_at |                      |                                 |                   | TC371214 1e-16  | CV062238 2e-121 |
| EBed02_SQ002_J19_at   |                      |                                 |                   | TC420300 9e-67  | BQ754855 2e-177 |
| EBed02_SQ002_L15_x_at |                      |                                 |                   |                 | TC230029 7e-80  |
| EBed02_SQ002_N01_at   |                      |                                 |                   | TC407087 2e-20  | TC229574 3e-117 |
| EBed02_SQ002_N06_at   |                      |                                 |                   | CV066044 1e-84  | TC219026 3e-27  |
| EBed02_SQ002_O04_at   |                      |                                 |                   | TC433575 4e-50  | TC227169 1e-97  |
| EBed02_SQ002_O17_at   |                      |                                 |                   |                 | TC234429 4e-103 |
| EBed02_SQ002_O20_at   |                      |                                 |                   |                 | TC208213 7e-35  |
| EBed02_SQ003_C14_s_at |                      |                                 |                   | TC393238 2e-15  | TC198095 7e-28  |
| EBed02_SQ003_E04_at   |                      |                                 |                   |                 | TC226946 0.0    |
| EBed02_SQ003_E11_at   |                      | Os10g0345900 AK120983 7e-06     |                   | TC452131 2e-75  | BQ754947 0.0    |
| EBed02_SQ003_F07_s_at |                      |                                 |                   | TC404713 2e-48  | TC198307 9e-76  |
| EBed02_SQ003_G01_at   |                      |                                 |                   | CD894078 2e-65  | BQ754981 6e-137 |
| EBed02_SQ003_G17_at   |                      |                                 |                   | CD900261 6e-12  | BQ754996 2e-111 |
| EBed02_SQ003_G22_s_at |                      |                                 |                   | TC392942 8e-47  | TC198330 9e-57  |
| EBed02_SQ003_H07_at   |                      |                                 |                   | BQ171892 3e-21  | BQ755007 7e-171 |
| EBed02_SQ003_J03_at   |                      |                                 |                   |                 | BQ755048 0.0    |
| EBed02_SQ003_L11_at   |                      |                                 |                   |                 | TC236228 1e-19  |
| EBed02_SQ003_L11_s_at |                      |                                 |                   | TC449515 2e-101 | TC195486 5e-134 |
| EBed07_SQ001_B14_s_at |                      |                                 |                   |                 | TC234731 1e-22  |
| EBed07_SQ001_P13_at   |                      |                                 |                   | TC435786 5e-38  | BM441935 2e-155 |
| EBed07_SQ002_I13_s_at |                      |                                 |                   |                 | TC237012 2e-31  |
| EBed07_SQ002_L04_at   | Bradi1g37780.1 1e-08 |                                 |                   | BQ240905 4e-25  | BQ755271 1e-87  |
| EBed07_SQ003_D02_x_at |                      |                                 |                   | TC457007 1e-12  | TC230575 4e-65  |
| EBed07_SQ003_F20_at   |                      |                                 |                   |                 | BQ755864 0.0    |
| EBed07_SQ003_I06_at   |                      |                                 |                   |                 | TC198595 8e-42  |
| EBem04_SQ002_B11_x_at |                      |                                 |                   | CJ565130 2e-11  | BE060090 1e-56  |
| EBem04_SQ002_C07_at   |                      |                                 |                   |                 | BM097590 3e-91  |
| EBem04_SQ002_C07_s_at |                      |                                 |                   | TC384903 8e-15  | BM097590 2e-136 |
| EBem04_SQ002_C12_at   |                      |                                 |                   | TC372410 2e-29  | BM097595 0.0    |
| EBem04_SQ002_D16_at   |                      |                                 |                   |                 | BM097619 0.0    |
| EBem04_SQ002_E10_at   |                      |                                 |                   |                 | BM097634 5e-175 |
| EBem04_SQ003_G17_at   |                      |                                 |                   | TC398108 5e-16  | BM377531 8e-31  |
| EBem04_SQ003_G17_s_at |                      |                                 |                   | TC398108 2e-67  | BM377531 4e-119 |
| EBem04_SQ003_H15_at   |                      |                                 |                   |                 | TC213332 3e-179 |
| EBem04_SQ003_J01_at   |                      |                                 |                   | TC451983 3e-23  | TC208530 5e-112 |
| EBem04_SQ003_P19_at   | Bradi4g45380.1 1e-16 | Os11g0100200 J065083C22 7e-14   | AT5G02530.1 4e-10 | TC412244 1e-54  | BM377734 0.0    |
| EBem04_SQ004_H07_at   |                      |                                 |                   |                 | TC222845 1e-137 |
| EBem04_SQ004_I19_at   |                      |                                 |                   |                 | TC204396 3e-173 |
| EBem04_SQ004_M07_s_at | Bradi1g63410.4 2e-31 | Os03g0332400 AK103161 3e-30     | AT3G10850.1 4e-23 | TC408810 1e-102 | TC197575 3e-110 |
| EBem04_SQ004_O17_s_at |                      |                                 |                   | TC387559 4e-40  | TC205553 5e-71  |
| EBem04_SQ004_P12_at   |                      |                                 |                   |                 | BM378032 1e-87  |
| EBem04_SQ004_P22_at   | Bradi3g37610.1 8e-75 | Os11g0241900 AK066870 1e-72     | AT5G20680.2 8e-53 | TC412809 0.0    | TC211612 0.0    |
| EBem05_SQ001_C10_at   |                      |                                 |                   |                 | TC237985 5e-52  |

|                       |                      |                                 |                   |                 |                 |
|-----------------------|----------------------|---------------------------------|-------------------|-----------------|-----------------|
| EBem05_SQ001_F02_at   |                      |                                 |                   | TC433609 1e-43  | TC237953 6e-80  |
| EBem05_SQ001_F09_at   |                      |                                 |                   | TC445878 1e-37  | BI779728 5e-87  |
| EBem05_SQ001_G16_at   |                      |                                 |                   | TC442012 8e-24  | TC229907 4e-119 |
| EBem05_SQ001_I09_at   | Bradi5g13880.1 4e-42 | Os08g0236700 Os08g0236700 2e-35 | AT1G67660.1 4e-23 | TC388794 7e-130 | TC210686 1e-163 |
| EBem05_SQ001_K06_at   |                      |                                 |                   |                 | BQ756086 3e-148 |
| EBem05_SQ001_N05_at   |                      |                                 |                   |                 | BQ756121 5e-52  |
| EBem05_SQ002_B05_at   |                      |                                 |                   |                 | BM376384 1e-122 |
| EBem05_SQ002_D05_s_at |                      |                                 |                   | EB515409 1e-25  | TC210559 3e-104 |
| EBem05_SQ002_E11_at   |                      |                                 |                   |                 | BM376465 0.0    |
| EBem05_SQ002_E15_at   | Bradi2g34360.1 2e-30 | Os01g0170500 AK106837 2e-26     | AT1G10750.1 4e-24 |                 | BM376469 6e-162 |
| EBem05_SQ002_F23_at   | Bradi2g43230.1 4e-28 | Os04g0494900 AK073892 5e-36     | AT1G80240.1 2e-20 | TC412741 3e-114 | BM376488 0.0    |
| EBem05_SQ002_M12_at   |                      |                                 |                   | TC418771 8e-54  | TC224916 4e-78  |
| EBem05_SQ003_C02_at   |                      |                                 |                   |                 | TC218343 6e-58  |
| EBem05_SQ003_E07_at   | Bradi5g02190.1 8e-06 |                                 |                   | CD896764 2e-34  | BM376796 2e-152 |
| EBem05_SQ003_F24_s_at |                      |                                 |                   | TC445366 9e-16  | TC195264 1e-58  |
| EBem05_SQ003_G09_at   |                      |                                 |                   | TC409128 3e-24  | TC200217 2e-165 |
| EBem05_SQ003_G20_at   |                      |                                 |                   | TC422531 3e-151 | TC214134 0.0    |
| EBem05_SQ003_J11_at   |                      |                                 |                   |                 | BM376916 3e-69  |
| EBem05_SQ003_L06_at   | Bradi1g68440.1 2e-18 | Os03g0245800 AK120048 3e-19     | AT4G27670.1 6e-14 | TC369383 1e-94  | TC223876 0.0    |
| EBem05_SQ003_O06_at   | Bradi4g33830.1 5e-28 | Os09g0491676 AK064834 8e-24     |                   | TC403130 2e-159 | TC196537 0.0    |
| EBem05_SQ003_O11_at   | Bradi2g18110.1 2e-20 | Os11g0103400 Os11g0103400 2e-19 |                   | TC459806 8e-23  | BM377025 0.0    |
| EBem05_SQ004_B02_at   |                      |                                 |                   | TC457120 5e-178 | TC207375 0.0    |
| EBem05_SQ004_C15_at   | Bradi2g04280.1 4e-07 |                                 |                   | TC431544 8e-73  | TC208924 7e-105 |
| EBem05_SQ004_D02_s_at |                      |                                 |                   |                 | BM377120 3e-129 |
| EBem05_SQ004_F24_x_at |                      |                                 |                   |                 | TC220045 1e-36  |
| EBem05_SQ004_G20_at   |                      |                                 |                   | TC457272 6e-65  | TC232222 8e-127 |
| EBem05_SQ004_I01_at   | Bradi4g34260.1 4e-43 | Os09g0500200 AK071129 2e-38     | AT4G26965.1 2e-30 | TC422076 6e-171 | TC218682 0.0    |
| EBem05_SQ004_K20_at   |                      |                                 |                   | TC442986 3e-101 | TC225009 1e-156 |
| EBem06_SQ001_N09_at   |                      |                                 |                   |                 | TC217318 2e-137 |
| EBem06_SQ001_N09_s_at |                      |                                 |                   |                 | TC217318 0.0    |
| EBem06_SQ002_C05_at   | Bradi2g57740.1 4e-30 | Os01g0899700 AK110796 6e-26     |                   | TC379567 2e-168 | BM375031 0.0    |
| EBem06_SQ002_J24_at   |                      |                                 |                   | CA730793 3e-15  | BM375193 0.0    |
| EBem06_SQ003_C02_at   |                      |                                 |                   | TC423166 2e-63  | TC215114 0.0    |
| EBem06_SQ003_C15_at   | Bradi4g08070.1 1e-07 |                                 |                   | TC440387 2e-65  | BM375374 0.0    |
| EBem06_SQ003_C15_x_at | Bradi4g08070.1 2e-07 |                                 |                   | TC440387 3e-65  | BM375374 0.0    |
| EBem06_SQ003_J07_at   |                      |                                 |                   | TC431934 2e-84  | TC206221 2e-174 |
| EBem06_SQ003_J09_at   |                      |                                 |                   |                 | BM375517 0.0    |
| EBem06_SQ004_E07_at   |                      |                                 |                   |                 | TC202671 3e-34  |
| EBem06_SQ004_E07_s_at |                      |                                 |                   | CJ626670 2e-145 | TC202671 3e-154 |
| EBem06_SQ004_E23_s_at | Bradi5g19350.1 1e-52 | Os09g0553100 014-049-A05 2e-52  | AT5G59690.1 1e-52 | TC414085 1e-154 | TC210058 0.0    |
| EBem07_SQ003_D09_at   | Bradi1g36930.1 8e-11 | Os06g0597000 AK069376 5e-10     | AT3G23050.1 1e-07 | TC404835 3e-15  | BM369309 0.0    |
| EBem07_SQ004_I01_at   |                      |                                 |                   |                 | BM369750 5e-178 |
| EBem08_SQ001_B01_at   | Bradi2g42480.1 4e-07 | Os02g0125700 AK071006 2e-07     | AT1G61080.1 1e-08 |                 | BI780430 6e-143 |
| EBem08_SQ002_D16_s_at |                      |                                 |                   | TC392599 4e-29  | TC213262 5e-32  |
| EBem08_SQ002_K13_at   |                      |                                 |                   |                 | BM098356 1e-144 |
| EBem08_SQ002_L02_s_at |                      |                                 |                   | CK153474 3e-17  | TC235335 3e-27  |
| EBem08_SQ002_N23_x_at |                      |                                 |                   |                 | TC218042 6e-74  |
| EBem08_SQ003_L01_at   |                      |                                 |                   | TC379402 4e-46  | TC201207 1e-68  |
| EBem08_SQ003_M18_at   |                      |                                 |                   | TC460910 2e-84  | TC232098 1e-169 |
| EBem08_SQ003_N21_at   |                      |                                 |                   |                 | TC236545 3e-63  |
| EBem08_SQ003_O18_at   |                      |                                 |                   |                 | TC208929 5e-150 |
| EBem08_SQ004_F24_at   |                      |                                 |                   |                 | BM368702 2e-77  |
| EBem08_SQ004_I12_at   |                      |                                 |                   |                 | BM368760 1e-169 |
| EBem08_SQ004_K17_at   | Bradi2g60210.1 2e-08 | Os01g0937100 AK105806 6e-06     |                   | CK198809 1e-29  | BM368811 9e-139 |
| EBem08_SQ004_K18_at   |                      |                                 |                   | TC448980 3e-20  | TC233951 3e-110 |
| EBem08_SQ004_M17_at   |                      |                                 |                   | TC454200 3e-99  | TC214342 0.0    |
| EBem08_SQ004_N04_at   |                      |                                 |                   | TC431809 4e-38  | TC232296 1e-112 |
| EBem09_SQ001_A14_at   |                      |                                 |                   | TC427191 6e-22  | TC235095 2e-143 |
| EBem09_SQ001_B21_s_at |                      |                                 |                   | TC376327 4e-26  | TC232955 5e-36  |
| EBem09_SQ001_C09_at   |                      |                                 |                   |                 | BM443682 1e-42  |
| EBem09_SQ001_C10_at   | Bradi3g12240.1 5e-06 | Os07g0476200 AK067379 2e-08     |                   | TC425924 7e-40  | TC217253 1e-128 |
| EBem09_SQ001_C17_at   | Bradi3g59980.1 2e-08 | Os02g0735100 AK120606 6e-06     |                   | CD919432 4e-57  | TC227435 3e-170 |
| EBem09_SQ001_F20_s_at | Bradi2g25460.1 2e-40 | Os05g0410500 AK110441 3e-38     | AT1G68570.1 5e-12 | CK207157 8e-16  | BM443745 0.0    |
| EBem09_SQ001_H19_s_at |                      |                                 |                   |                 | TC203961 5e-15  |
| EBem09_SQ001_L06_s_at | Bradi3g58250.1 7e-13 | Os02g0760300 AK063850 1e-10     | AT5G64350.1 2e-09 | TC400695 2e-111 | TC209592 2e-140 |
| EBem09_SQ001_O02_s_at |                      |                                 |                   | TC414402 8e-12  | TC215882 2e-35  |
| EBem09_SQ002_H11_x_at | Bradi3g55170.1 6e-11 | Os02g0111700 AK058280 8e-11     | AT1G15250.1 2e-08 | TC394427 3e-54  | TC230559 4e-82  |
| EBem09_SQ002_L08_s_at |                      |                                 |                   |                 | TC198379 3e-27  |
| EBem09_SQ002_L08_x_at |                      |                                 |                   | TC396193 6e-39  | TC198379 4e-47  |
| EBem09_SQ002_M07_at   |                      |                                 |                   |                 | BM444018 3e-53  |
| EBem09_SQ002_P17_s_at |                      |                                 |                   | CK167433 5e-11  | BI952400 4e-16  |
| EBem09_SQ003_F03_at   |                      |                                 |                   |                 | BQ756638 9e-114 |
| EBem09_SQ003_F16_s_at |                      |                                 |                   | CJ706208 1e-18  | TC195987 2e-64  |
| EBem09_SQ003_P12_s_at |                      |                                 |                   | TC370827 7e-38  | TC204228 1e-58  |
| EBem09_SQ004_B23_s_at |                      |                                 |                   | TC379807 1e-15  | TC203136 4e-75  |
| EBem09_SQ004_G07_at   |                      |                                 |                   | TC424745 3e-16  | TC203869 7e-80  |
| EBem09_SQ004_H15_x_at |                      |                                 |                   | CK198194 6e-11  | TC225310 3e-60  |
| EBem09_SQ004_I01_at   |                      |                                 |                   | CA641376 4e-23  | BM444216 1e-156 |
| EBem09_SQ004_N01_at   |                      |                                 |                   |                 | BM444320 4e-59  |
| EBem09_SQ005_B09_s_at |                      |                                 |                   | TC449061 8e-21  | TC217031 9e-31  |
| EBem09_SQ005_B14_s_at |                      |                                 |                   | TC370303 3e-51  | TC230287 1e-103 |
| EBem09_SQ005_C08_s_at |                      |                                 |                   | TC378628 4e-53  | TC197486 8e-83  |
| EBem09_SQ005_D09_at   |                      |                                 |                   |                 | BM444430 2e-102 |
| EBem09_SQ005_G06_at   |                      |                                 |                   |                 | BM444485 1e-137 |
| EBem09_SQ005_H10_s_at |                      |                                 |                   |                 | BM444500 1e-52  |
| EBem09_SQ006_J23_at   |                      |                                 |                   | TC432168 4e-47  | BM444833 4e-116 |
| EBem09_SQ006_K11_x_at |                      |                                 |                   |                 |                 |
| EBem09_SQ006_L23_at   |                      |                                 |                   |                 | TC234781 5e-39  |
| EBem09_SQ006_P13_at   |                      |                                 |                   | TC437039 4e-12  | TC205423 1e-74  |
| EBem09_SQ007_D05_s_at |                      |                                 |                   | TC388487 2e-17  | BM445020 1e-71  |
| EBem09_SQ007_D05_x_at |                      |                                 |                   | TC388487 1e-15  | BM445020 5e-90  |
| EBem09_SQ007_E01_at   |                      |                                 |                   |                 | TC213670 3e-79  |
| EBem09_SQ007_G10_at   |                      |                                 |                   | TC451111 6e-36  | TC232982 4e-72  |
| EBem09_SQ007_P17_at   | Bradi2g60230.1 6e-19 | Os01g0937300 AK122144 7e-15     |                   | TC384851 2e-57  | BM445289 9e-92  |
| EBem10_SQ001_A02_at   |                      |                                 |                   | TC373876 6e-50  | BQ761529 2e-161 |
| EBem10_SQ001_D03_at   |                      |                                 |                   | TC446960 1e-15  | BQ761542 1e-87  |
| EBem10_SQ001_I05_at   |                      |                                 |                   |                 | TC214686 8e-54  |
| EBem10_SQ001_I24_s_at |                      |                                 |                   | TC425292 1e-12  | TC217668 1e-68  |
| EBem10_SQ001_J14_s_at | Bradi2g14960.1 3e-12 | Os05g0579900 AK063417 8e-06     |                   | TC381573 8e-73  | BQ761708 2e-102 |
| EBem10_SQ001_L08_at   |                      |                                 |                   | TC391421 1e-71  | TC235090 2e-117 |
| EBem10_SQ001_N01_x_at |                      |                                 |                   | TC384077 5e-32  | TC237067 1e-39  |
| EBem10_SQ001_P13_s_at |                      |                                 |                   | TC455555 1e-16  | TC211186 1e-113 |
| EBem10_SQ002_A13_at   |                      |                                 |                   | TC386666 1e-40  | TC199823 6e-96  |
| EBem10_SQ002_A13_s_at |                      |                                 |                   | TC386666 4e-47  | TC199823 1e-103 |
| EBem10_SQ002_A16_at   |                      |                                 |                   | CK169955 1e-48  | TC236356 2e-51  |
| EBem10_SQ002_C21_at   | Bradi3g42200.1 2e-10 | Os08g0547600 Os08g0547600 4e-07 |                   |                 | BQ756920 1e-162 |
| EBem10_SQ002_I10_s_at |                      |                                 |                   | CA666603 4e-27  | TC195787 1e-58  |
| EBem10_SQ002_L14_s_at |                      |                                 |                   | TC444825 4e-11  | BQ757074 1e-42  |
| EBem10_SQ002_L23_at   |                      |                                 |                   | CA671871 1e-16  | TC235789 1e-29  |
| EBem10_SQ002_L23_s_at |                      |                                 |                   | CK200362 4e-26  | TC201667 1e-141 |
| EBem10_SQ003_G23_s_at |                      |                                 |                   | TC393033 3e-35  | TC216799 5e-100 |
| EBem10_SQ003_I02_at   |                      |                                 |                   | TC442602 9e-13  | BQ757264 7e-64  |
| EBem10_SQ003_I08_s_at |                      |                                 |                   | TC398522 6e-28  | TC220671 1e-131 |
| EBem10_SQ003_N11_at   |                      |                                 |                   |                 | BQ757353 3e-40  |
| EBem10_SQ004_A08_at   |                      |                                 |                   |                 | TC232220 6e-137 |
| EBem10_SQ004_B20_s_at |                      |                                 |                   | TC397117 4e-29  | TC199035 2e-34  |
| EBem10_SQ004_C11_at   |                      |                                 |                   | TC411453 8e-23  | TC236152 1e-74  |

|                       |                      |                                 |                   |                 |                 |
|-----------------------|----------------------|---------------------------------|-------------------|-----------------|-----------------|
| EBem10.SQ004.D16_at   |                      |                                 |                   |                 | TC230088 9e-44  |
| EBem10.SQ004.F01_s_at |                      |                                 |                   | CK208806 3e-32  | TC208276 6e-93  |
| EBem10.SQ004.F11_at   |                      |                                 |                   | TC423727 2e-11  | BQ757504 2e-80  |
| EBem10.SQ004.H02_at   |                      |                                 |                   |                 | BQ757539 1e-93  |
| EBem10.SQ004.H14_at   |                      |                                 |                   | TC429453 2e-17  | BQ757549 1e-65  |
| EBem10.SQ004.J15_at   |                      |                                 |                   | TC449004 1e-49  | TC221154 9e-92  |
| EBem10.SQ004.L13_at   |                      | Os11g0591600 AK058631 6e-16     |                   | TC430701 2e-71  | TC228797 1e-160 |
| EBem10.SQ004.P21_x_at |                      |                                 |                   | TC459383 6e-45  | TC230133 4e-50  |
| EBem10.SQ005.F01_x_at |                      |                                 |                   | TC404931 2e-17  | TC228632 6e-65  |
| EBem10.SQ005.G09_at   |                      |                                 |                   |                 | BQ757841 0.0    |
| EBem10.SQ005.L23_x_at |                      |                                 |                   | CA632724 1e-28  | TC222752 7e-96  |
| EBem10.SQ005.N05_at   |                      |                                 |                   |                 | TC235231 8e-133 |
| EBem10.SQ005.P17_x_at |                      |                                 |                   |                 | TC198333 2e-22  |
| EBes01_SQ001_F10_at   | Bradi4g35000.1 6e-18 | Os09g0513100 AK120151 2e-18     | AT4G19860.1 3e-09 | TC426273 2e-121 | TC222183 0.0    |
| EBes01_SQ002_A24_s_at | Bradi4g01760.1 8e-19 | Os12g0613500 AK101273 3e-18     | AT5G57120.1 2e-17 | TC387327 6e-72  | BI780747 0.0    |
| EBes01_SQ002_D15_at   |                      | Os02g0227900 Os02g0227900 4e-06 |                   | TC429330 5e-100 | BI780794 3e-179 |
| EBes01_SQ002_E05_at   |                      |                                 |                   |                 | TC230208 6e-35  |
| EBes01_SQ002_J08_at   | Bradi1g11420.1 4e-26 | Os03g0110800 AK065147 1e-25     | AT5G14620.1 8e-21 | BJ240293 9e-49  | BM099220 3e-157 |
| EBes01_SQ002_N18_at   |                      |                                 |                   | TC423090 3e-105 | BM099307 0.0    |
| EBes01_SQ002_O07_at   |                      |                                 |                   |                 | BM099317 0.0    |
| EBes01_SQ003_D22_x_at |                      |                                 |                   |                 | BM099435 6e-35  |
| EBes01_SQ003_E04_at   |                      |                                 |                   |                 | BM099441 1e-147 |
| EBes01_SQ003_E13_s_at | Bradi5g21630.1 4e-22 | Os04g0613600 J075104F07 4e-19   | AT3G48930.1 4e-19 | CA658206 3e-77  | BM099450 0.0    |
| EBes01_SQ003_E20_at   |                      | Os10g0346000 Os10g0346000 8e-08 |                   | TC437718 1e-13  | BM099454 2e-152 |
| EBes01_SQ003_J24_at   | Bradi1g35280.1 3e-09 |                                 |                   | CV065013 2e-62  | BM099567 0.0    |
| EBes01_SQ003_K12_at   |                      |                                 |                   |                 | BM099578 0.0    |
| EBes01_SQ003_M14_at   |                      |                                 |                   | TC429548 5e-51  | BM099635 0.0    |
| EBes01_SQ003_N19_at   |                      |                                 |                   | TC430756 2e-118 | BM099656 0.0    |
| EBes01_SQ003_O17_at   |                      |                                 |                   | TC446661 2e-13  | TC231702 3e-40  |
| EBes01_SQ003_P22_x_at | Bradi3g29320.1 2e-18 | Os03g0369100 AK111061 5e-15     |                   | TC407087 8e-71  | BM099701 2e-165 |
| EBes01_SQ004_F23_at   |                      |                                 |                   | TC444860 5e-32  | TC229736 1e-175 |
| EBes01_SQ004_G11_at   |                      |                                 |                   |                 | TC231202 0.0    |
| EBes01_SQ004_K24_at   |                      |                                 |                   | TC405731 1e-39  | TC231193 0.0    |
| EBes01_SQ004_M23_at   |                      |                                 |                   | TC439624 4e-60  | BM099975 2e-161 |
| EBes01_SQ004_M24_at   | Bradi2g43980.3 8e-19 | Os01g0623500 AK066142 4e-17     | AT4G28000.1 1e-15 | TC410693 5e-134 | TC226907 0.0    |
| EBes01_SQ004_N07_at   |                      |                                 |                   |                 | TC199835 5e-22  |
| EBma01_SQ001_B22_at   |                      |                                 |                   | TC433459 7e-13  | TC219788 0.0    |
| EBma01_SQ001_F22_at   |                      |                                 |                   |                 | BM100157 0.0    |
| EBma01_SQ001_O20_at   |                      |                                 |                   | TC452890 2e-32  | TC231281 0.0    |
| EBma01_SQ002_A20_at   | Bradi2g23300.1 4e-07 | Os05g0459300 AK121463 3e-13     |                   | TC390775 8e-37  | TC237865 1e-150 |
| EBma01_SQ002_F07_s_at |                      |                                 |                   |                 | BM376092 1e-36  |
| EBma01_SQ002_F17_at   | Bradi3g55700.1 9e-33 | Os12g0163300 AK069765 2e-32     | AT3G58180.1 3e-26 | TC420920 1e-153 | TC222050 0.0    |
| EBma01_SQ005_B17_at   |                      |                                 |                   |                 | TC218560 0.0    |
| EBma01_SQ005_G16_at   | Bradi4g26770.1 1e-35 | Os12g0106600 AK064975 2e-20     | AT2G38330.1 3e-19 | BE470822 9e-53  | BM100504 0.0    |
| EBma01_SQ005_J20_at   |                      |                                 |                   | TC424505 3e-132 | TC234513 0.0    |
| EBma01_SQ005_K17_at   |                      | Os02g0227900 Os02g0227900 4e-09 |                   | TC431717 2e-68  | TC225518 1e-178 |
| EBma01_SQ005_P22_s_at |                      |                                 |                   | TC376585 2e-33  | TC198408 1e-75  |
| EBma03_SQ001_C19_at   | Bradi1g00560.2 2e-18 | Os03g0861100 AK100706 6e-16     |                   | TC415928 3e-48  | BI781018 5e-150 |
| EBma03_SQ001_D18_at   |                      |                                 |                   |                 | BI781039 5e-131 |
| EBma03_SQ001_K06_x_at | Bradi1g06340.1 1e-61 | Os03g0787300 AK061049 2e-57     | AT3G44110.1 2e-44 | TC438609 5e-110 | BI781165 0.0    |
| EBma03_SQ001_N10_at   |                      |                                 |                   | TC439942 7e-33  | BM096520 6e-93  |
| EBma03_SQ001_O12_at   |                      |                                 |                   |                 | BM096503 9e-57  |
| EBma03_SQ002_D19_at   |                      |                                 |                   |                 | BM373650 2e-28  |
| EBma03_SQ002_F16_s_at |                      |                                 |                   | TC416944 2e-26  | TC212825 3e-79  |
| EBma03_SQ002_J20_x_at |                      |                                 |                   | TC395306 1e-23  | TC217717 3e-47  |
| EBma03_SQ002_K01_s_at |                      |                                 |                   | TC444647 4e-46  | TC202420 1e-74  |
| EBma03_SQ002_K22_x_at |                      |                                 |                   |                 | TC210443 1e-24  |
| EBma03_SQ002_M07_at   |                      |                                 |                   | CK162384 6e-34  | TC196895 3e-123 |
| EBma03_SQ002_M18_at   |                      |                                 |                   |                 |                 |
| EBma03_SQ003_D20_at   |                      |                                 |                   |                 | DN188877 2e-38  |
| EBma03_SQ003_G07_s_at |                      |                                 |                   | TC372884 2e-61  | TC208039 7e-124 |
| EBma03_SQ003_I18_at   |                      |                                 |                   | TC402209 1e-54  | BM374066 2e-152 |
| EBma03_SQ003_J21_at   |                      |                                 |                   | CV765962 2e-17  | BI960630 4e-23  |
| EBma03_SQ003_J21_s_at |                      |                                 |                   | CA710971 1e-27  | TC238359 9e-76  |
| EBma03_SQ003_L08_at   |                      |                                 |                   |                 | TC206562 3e-20  |
| EBma03_SQ003_L08_s_at |                      |                                 |                   | TC408217 1e-20  | TC206562 5e-55  |
| EBma03_SQ003_L14_s_at |                      |                                 |                   | TC386453 2e-121 | TC207357 2e-180 |
| EBma03_SQ003_N08_s_at |                      |                                 |                   | TC385340 1e-19  | TC223216 1e-29  |
| EBma03_SQ003_O14_at   |                      |                                 |                   |                 | TC235579 5e-55  |
| EBma03_SQ003_P07_at   |                      |                                 |                   | BJ218223 9e-46  | TC203265 6e-159 |
| EBma03_SQ003_P14_s_at | Bradi3g19910.1 6e-14 | Os08g0290100 AK073404 1e-10     |                   | TC414128 3e-58  | TC210923 0.0    |
| EBma04_SQ002_G23_at   |                      |                                 |                   | CD887512 2e-19  | BM372930 1e-156 |
| EBma04_SQ002_J11_at   |                      |                                 |                   | TC426598 5e-26  | BM372968 4e-46  |
| EBma04_SQ002_L13_s_at |                      |                                 |                   |                 | TC237834 4e-16  |
| EBma04_SQ002_L23_s_at |                      |                                 |                   |                 | BM373013 7e-86  |
| EBma04_SQ002_N16_at   | Bradi4g01610.1 5e-30 | Os12g0615700 AK058512 1e-28     | AT3G59030.1 6e-22 | TC381535 2e-51  | BM373040 0.0    |
| EBma04_SQ003_H18_s_at | Bradi2g09520.1 5e-08 | Os01g0261100 AK102361 5e-06     |                   | TC384834 3e-74  | TC201711 0.0    |
| EBma04_SQ003_K13_s_at |                      |                                 |                   | TC380059 6e-156 | BM373239 5e-106 |
| EBma04_SQ004_B18_at   |                      |                                 |                   | TC450292 9e-42  | BM373348 2e-117 |
| EBma04_SQ004_G11_at   |                      |                                 |                   |                 | BM373425 3e-120 |
| EBma04_SQ004_H13_at   |                      |                                 |                   |                 | TC205489 1e-109 |
| EBma04_SQ004_K04_at   |                      |                                 |                   | TC431180 6e-25  | TC229118 7e-115 |
| EBma05_SQ001_N04_at   |                      |                                 |                   |                 | BM096533 0.0    |
| EBma05_SQ002_B10_at   |                      |                                 |                   |                 | TC216372 4e-169 |
| EBma05_SQ002_C09_at   |                      |                                 |                   | CJ582101 1e-39  | TC200774 0.0    |
| EBma05_SQ002_M06_at   |                      |                                 |                   |                 | BM374771 4e-81  |
| EBma05_SQ003_B12_at   |                      |                                 |                   |                 | TC233611 2e-114 |
| EBma05_SQ003_C16_s_at |                      |                                 |                   |                 | TC208675 4e-59  |
| EBma05_SQ003_D16_at   |                      |                                 |                   | EB512467 1e-85  | BM374854 0.0    |
| EBma05_SQ003_H21_at   | Bradi3g55170.1 6e-22 | Os02g0815001 J075052L23 3e-21   | AT1G52300.1 1e-18 | TC418213 3e-151 | TC217667 0.0    |
| EBma05_SQ003_N16_at   |                      |                                 |                   | TC389685 1e-27  | BM374967 0.0    |
| EBma08_SQ001_P14_at   |                      |                                 |                   |                 | BM096905 5e-128 |
| EBma08_SQ002_F06_at   |                      |                                 |                   | BE422961 2e-13  | BM371330 0.0    |
| EBma08_SQ002_M18_at   |                      |                                 |                   | CK195476 2e-111 | TC230566 7e-112 |
| EBma08_SQ003_G06_at   |                      |                                 |                   | TC425022 7e-46  | TC235911 3e-126 |
| EBma08_SQ003_L03_at   |                      |                                 |                   |                 | BM371718 0.0    |
| EBma08_SQ003_L11_at   |                      | AK108864 AK108864 2e-06         |                   |                 | BM371723 9e-161 |
| EBma08_SQ004_C09_at   | Bradi3g55690.1 4e-06 |                                 |                   |                 | BM371841 3e-173 |
| EBma08_SQ004_C15_s_at |                      |                                 |                   | TC374157 1e-25  | TC220161 2e-28  |
| EBma08_SQ004_I07_at   | Bradi5g23150.1 1e-06 | Os04g0635100 009-164-B01 2e-06  | AT4G10270.1 1e-05 | TC415915 8e-27  | BM371958 2e-108 |
| EBma08_SQ004_N18_at   |                      |                                 |                   |                 | BM372064 2e-143 |
| EBpi01_SQ001_A05_s_at |                      |                                 |                   | CJ792349 1e-20  | TC208997 0.0    |
| EBpi01_SQ001_B04_s_at |                      |                                 |                   | TC429363 7e-42  | TC222521 3e-85  |
| EBpi01_SQ001_C05_at   |                      |                                 |                   | TC398255 1e-62  | BM100720 2e-86  |
| EBpi01_SQ001_C06_at   | Bradi5g03810.1 6e-08 | Os04g0224900 AK058569 5e-07     |                   | TC388057 5e-69  | TC209301 2e-134 |
| EBpi01_SQ001_D04_at   |                      |                                 |                   |                 | TC233991 1e-103 |
| EBpi01_SQ001_G04_at   |                      |                                 |                   |                 | TC235563 7e-86  |
| EBpi01_SQ001_I04_s_at | Bradi3g46080.1 2e-21 | Os02g0562700 AK071800 6e-21     | AT3G25530.1 1e-16 | TC375820 1e-112 | TC206090 2e-161 |
| EBpi01_SQ001_K06_s_at | Bradi1g30210.1 9e-06 |                                 | AT3G22230.1 9e-06 | CK212561 2e-27  | TC231225 5e-29  |
| EBpi01_SQ001_L06_at   |                      |                                 |                   |                 | TC204151 5e-131 |
| EBpi01_SQ002_A19_at   | Bradi4g27630.1 1e-11 |                                 |                   | TC405101 3e-71  | BM100802 0.0    |
| EBpi01_SQ002_B23_at   |                      |                                 |                   | TC423983 4e-46  | TC197664 0.0    |
| EBpi01_SQ002_F17_s_at |                      |                                 |                   | TC400917 4e-44  | TC212224 3e-120 |
| EBpi01_SQ002_G19_at   |                      |                                 |                   | TC449094 7e-40  | TC236158 5e-128 |
| EBpi01_SQ002_G23_at   |                      |                                 |                   |                 | BM100943 1e-36  |
| EBpi01_SQ002_G23_s_at |                      |                                 |                   | TC431318 7e-25  | TC195965 1e-166 |
| EBpi01_SQ002_J02_at   |                      |                                 |                   | TC445846 8e-42  | TC235636 2e-95  |

|                       |                      |                                 |                   |                 |                 |
|-----------------------|----------------------|---------------------------------|-------------------|-----------------|-----------------|
| EBpi01_SQ002_J11_at   |                      |                                 |                   |                 | TC225975 0.0    |
| EBpi01_SQ002_J16_at   |                      |                                 |                   |                 | TC212440 1e-42  |
| EBpi01_SQ002_L02_at   |                      |                                 |                   |                 | TC210136 4e-26  |
| EBpi01_SQ002_L02_x_at |                      |                                 |                   |                 | TC210136 1e-135 |
| EBpi01_SQ002_L03_at   |                      | Os01g0601625 Os01g0601625 1e-05 |                   | BF478539 2e-38  | BM101048 0.0    |
| EBpi01_SQ002_L21_at   |                      |                                 |                   |                 | TC211755 7e-105 |
| EBpi01_SQ002_N03_at   |                      |                                 |                   | TC458325 4e-14  | BM101081 1e-150 |
| EBpi01_SQ002_N08_at   |                      |                                 |                   |                 | TC209444 6e-96  |
| EBpi01_SQ002_N15_at   |                      |                                 |                   | TC427448 2e-75  | BM101093 2e-180 |
| EBpi01_SQ002_N22_s_at |                      |                                 |                   | CD932053 2e-28  | TC212769 3e-135 |
| EBpi01_SQ002_O09_at   | Bradi5g02910.1 3e-32 | Os04g0201200 Os04g0201200 1e-30 | AT3G10360.1 2e-20 | TC444064 0.0    | TC201334 0.0    |
| EBpi01_SQ002_O15_at   |                      |                                 |                   | TC444913 5e-19  | TC229569 2e-111 |
| EBpi01_SQ002_O17_at   |                      |                                 |                   |                 | BM101115 0.0    |
| EBpi01_SQ002_P02_at   |                      |                                 |                   |                 | BM101122 2e-164 |
| EBpi01_SQ002_P23_at   |                      |                                 |                   | TC437722 8e-102 | TC234266 2e-165 |
| EBpi01_SQ003_C12_at   |                      |                                 |                   |                 | BM101190 2e-61  |
| EBpi01_SQ003_C12_s_at |                      |                                 |                   | TC370190 6e-77  | TC212593 6e-115 |
| EBpi01_SQ003_E16_s_at |                      |                                 |                   | TC373860 4e-30  | TC197052 7e-51  |
| EBpi01_SQ003_I06_at   |                      |                                 |                   | TC431687 1e-44  | TC231086 5e-106 |
| EBpi01_SQ003_J17_at   |                      |                                 |                   | TC440957 2e-12  | TC230789 3e-40  |
| EBpi01_SQ003_L11_at   |                      |                                 |                   | TC417767 4e-26  | TC231044 2e-130 |
| EBpi01_SQ003_M12_at   |                      |                                 |                   | TC379098 2e-61  | TC233389 2e-102 |
| EBpi01_SQ004_C23_at   |                      |                                 |                   |                 | BQ759522 1e-125 |
| EBpi01_SQ004_D06_s_at |                      |                                 |                   |                 | TC202751 3e-30  |
| EBpi01_SQ004_D13_at   | Bradi1g33790.1 4e-48 | Os06g0695900 J023143A16 2e-44   | AT5G05810.1 1e-07 | CJ555792 1e-14  | TC210165 2e-165 |
| EBpi01_SQ004_D19_at   |                      |                                 |                   | CK199559 1e-24  | BQ759524 0.0    |
| EBpi01_SQ004_E15_at   | Bradi3g57130.1 2e-09 | Os02g0779200 AK121728 7e-07     |                   | TC383983 6e-13  | BQ759447 5e-42  |
| EBpi01_SQ004_E18_at   |                      |                                 |                   | TC431295 8e-59  | TC236487 3e-179 |
| EBpi01_SQ004_G05_at   |                      |                                 |                   |                 | TC216463 1e-119 |
| EBpi01_SQ004_I24_s_at |                      |                                 |                   | TC409537 3e-51  | TC215826 6e-118 |
| EBpi01_SQ004_J13_at   |                      |                                 |                   |                 | TC205033 0.0    |
| EBpi01_SQ004_K07_s_at |                      |                                 |                   |                 | TC223798 2e-121 |
| EBpi01_SQ004_K18_at   |                      |                                 |                   | TC428117 7e-75  | TC205449 0.0    |
| EBpi01_SQ004_O10_at   |                      |                                 |                   | TC425214 2e-14  | TC199788 4e-84  |
| EBpi01_SQ005_A03_at   |                      |                                 |                   | TC406496 5e-68  | TC197366 2e-111 |
| EBpi01_SQ005_B23_at   | Bradi1g04800.1 3e-30 | Os03g0806400 AK073074 5e-09     | AT4G26310.1 2e-18 | TC385700 0.0    | TC210537 0.0    |
| EBpi01_SQ005_B24_at   |                      |                                 |                   |                 | TC207727 0.0    |
| EBpi01_SQ005_E16_at   |                      | Os05g0546800 AK067522 6e-09     |                   | TC376992 3e-79  | TC201329 2e-140 |
| EBpi01_SQ005_F23_at   |                      |                                 |                   | BQ841688 8e-47  | TC226202 0.0    |
| EBpi01_SQ005_G10_at   |                      |                                 |                   | TC418188 3e-15  | TC202553 6e-48  |
| EBpi01_SQ005_G20_x_at |                      |                                 |                   | TC461123 3e-15  | TC235222 2e-149 |
| EBpi01_SQ005_H01_at   |                      |                                 |                   | TC390569 6e-42  | TC210356 2e-73  |
| EBpi01_SQ005_I12_x_at |                      |                                 |                   | TC446108 6e-56  | TC196476 2e-143 |
| EBpi01_SQ005_J09_s_at |                      |                                 |                   | CA712565 3e-46  | BQ762122 0.0    |
| EBpi01_SQ005_J19_at   | Bradi1g58360.1 2e-08 |                                 |                   | TC433876 4e-88  | BQ761962 8e-155 |
| EBpi01_SQ005_L09_at   |                      |                                 |                   |                 | BQ761885 9e-76  |
| EBpi01_SQ005_M04_at   |                      |                                 |                   | TC445910 3e-25  | TC198262 4e-62  |
| EBpi01_SQ005_N10_at   |                      |                                 |                   | TC378930 1e-76  | TC204135 0.0    |
| EBpi01_SQ005_P14_at   |                      |                                 |                   | TC405486 7e-24  | TC216815 2e-96  |
| EBpi01_SQ005_P17_at   |                      |                                 |                   | TC389133 1e-50  | TC221666 8e-152 |
| EBpi03_SQ001_A23_at   |                      |                                 |                   | CJ843547 2e-31  | TC215842 2e-165 |
| EBpi03_SQ001_I14_at   |                      |                                 |                   |                 | BI776991 6e-58  |
| EBpi03_SQ001_J13_at   |                      |                                 |                   | TC382287 3e-35  | TC211464 4e-84  |
| EBpi03_SQ001_J21_at   |                      |                                 |                   | TC389506 3e-21  | BI777028 4e-169 |
| EBpi03_SQ001_L04_at   | Bradi2g17500.1 2e-15 | Os07g0162201 Os07g0162201 5e-08 |                   |                 | BI777089 5e-156 |
| EBpi03_SQ001_N19_at   |                      |                                 |                   |                 | BI777093 9e-44  |
| EBpi03_SQ001_N23_at   |                      |                                 |                   | TC382607 6e-42  | TC202672 5e-71  |
| EBpi03_SQ001_N23_s_at |                      |                                 |                   |                 | BM097969 1e-163 |
| EBpi03_SQ002_C23_at   |                      |                                 |                   | TC431105 3e-39  | BM097981 2e-136 |
| EBpi03_SQ002_D12_at   |                      |                                 |                   | TC425242 1e-59  | TC203021 8e-108 |
| EBpi03_SQ003_A03_s_at | Bradi3g40240.1 3e-25 | Os03g0833300 AK069847 2e-17     | AT1G20980.1 8e-21 | BF482644 5e-69  | TC235942 9e-158 |
| EBpi03_SQ003_B07_at   |                      |                                 |                   |                 | TC236443 1e-68  |
| EBpi03_SQ003_C01_s_at | Bradi3g06230.1 5e-24 | Os03g0392600 AK103605 7e-22     | AT2G27920.1 6e-19 | TC425767 4e-110 | TC215568 0.0    |
| EBpi03_SQ003_E09_s_at | Bradi2g46320.1 1e-23 | Os01g0674000 AK099396 5e-18     |                   | TC399112 6e-109 | TC224335 0.0    |
| EBpi03_SQ003_I06_at   |                      |                                 |                   |                 | TC237829 1e-112 |
| EBpi03_SQ003_I07_at   | Bradi4g42560.1 7e-07 | Os12g0149900 AK072203 4e-06     |                   | TC401517 3e-76  | TC199975 9e-136 |
| EBpi03_SQ003_J22_at   |                      |                                 |                   | CA729084 2e-17  | BQ759621 3e-85  |
| EBpi03_SQ003_K06_at   |                      |                                 |                   | BJ297947 7e-16  | TC220812 1e-175 |
| EBpi03_SQ003_K07_at   |                      |                                 |                   |                 | BM374510 7e-124 |
| EBpi03_SQ003_N06_at   |                      |                                 |                   | TC418018 3e-104 | TC230412 2e-168 |
| EBpi03_SQ003_N16_at   |                      |                                 |                   |                 | TC205547 1e-15  |
| EBpi03_SQ003_P13_at   |                      |                                 |                   | TC388149 3e-20  | TC205547 4e-26  |
| EBpi03_SQ003_P13_s_at | Bradi3g49430.1 6e-43 |                                 | AT2G39260.1 2e-19 | TC398692 8e-145 | BI776437 1e-156 |
| EBpi05_SQ001_F13_at   |                      |                                 |                   |                 | TC207993 2e-80  |
| EBpi05_SQ001_M11_at   |                      |                                 |                   | TC448859 7e-50  | TC226035 1e-166 |
| EBpi05_SQ001_N05_at   |                      |                                 |                   |                 | BM098768 5e-153 |
| EBpi05_SQ002_A01_at   |                      |                                 |                   | TC411175 8e-111 | TC214642 3e-157 |
| EBpi05_SQ002_I18_s_at |                      |                                 |                   |                 | TC208250 6e-140 |
| EBpi05_SQ003_H04_at   |                      |                                 |                   |                 | TC221362 7e-102 |
| EBpi05_SQ003_I02_s_at | Bradi1g32870.1 4e-54 | Os06g0681600 AK070917 4e-49     | AT4G11290.1 6e-32 | TC440970 0.0    | BM372726 0.0    |
| EBpi05_SQ003_M06_at   |                      |                                 |                   |                 | BQ759740 5e-109 |
| EBpi05_SQ004_B11_at   |                      |                                 |                   | TC436052 1e-79  | BQ759759 0.0    |
| EBpi05_SQ004_F11_at   |                      |                                 |                   |                 | BI776572 2e-48  |
| EBpi07_SQ001_A11_at   |                      |                                 |                   | TC416340 2e-18  | TC207820 8e-102 |
| EBpi07_SQ001_B14_s_at |                      |                                 |                   | TC378093 6e-58  | TC227274 9e-89  |
| EBpi07_SQ001_B18_s_at |                      |                                 |                   |                 | TC233177 9e-114 |
| EBpi07_SQ001_E20_at   |                      |                                 |                   | TC437873 8e-30  |                 |
| EBpi07_SQ001_H07_at   |                      |                                 |                   |                 | BM096970 2e-64  |
| EBpi07_SQ001_P12_at   |                      |                                 |                   |                 | BM097014 2e-41  |
| EBpi07_SQ002_C01_at   |                      |                                 |                   |                 | BQ760006 1e-81  |
| EBpi07_SQ002_D03_at   |                      |                                 |                   |                 | TC231327 2e-130 |
| EBpi07_SQ002_E06_at   |                      |                                 |                   | TC456917 5e-42  | TC215767 0.0    |
| EBpi07_SQ002_E08_at   |                      |                                 |                   | TC404413 1e-65  | TC217782 5e-128 |
| EBpi07_SQ002_E23_s_at |                      |                                 |                   | TC378596 1e-27  | TC202635 8e-70  |
| EBpi07_SQ002_J15_at   |                      |                                 |                   | CK151635 2e-26  | TC219050 6e-80  |
| EBpi07_SQ002_L11_s_at |                      |                                 |                   | TC439847 4e-19  | TC203580 2e-28  |
| EBpi07_SQ002_O11_s_at |                      |                                 |                   |                 | BM097261 2e-105 |
| EBpi07_SQ002_O14_at   |                      |                                 |                   |                 | TC229845 9e-34  |
| EBpi07_SQ002_P18_s_at |                      |                                 |                   |                 | TC205406 5e-178 |
| EBro01_SQ001_C04_at   | Bradi2g53400.1 4e-16 |                                 |                   | CK201182 1e-119 | BM097288 0.0    |
| EBro01_SQ001_I18_at   | Bradi4g26430.1 9e-07 | AK107318 AK107318 4e-09         | AT3G24090.1 7e-07 |                 | BI778853 0.0    |
| EBro01_SQ001_M06_at   |                      | Os02g0506700 Os02g0506700 7e-06 |                   |                 | BI778929 0.0    |
| EBro01_SQ002_B19_at   |                      |                                 |                   |                 | TC232144 2e-143 |
| EBro01_SQ002_F02_at   | Bradi1g11810.1 5e-06 |                                 |                   | TC429271 2e-65  | BI779059 3e-173 |
| EBro01_SQ002_M14_at   | Bradi1g69340.1 4e-06 |                                 |                   | TC387641 1e-35  | TC196907 1e-97  |
| EBro01_SQ003_E12_x_at |                      |                                 |                   | TC444521 8e-58  | TC238365 5e-112 |
| EBro01_SQ003_E14_s_at |                      |                                 |                   | CK213872 4e-13  | BI779217 0.0    |
| EBro01_SQ003_F18_at   |                      |                                 |                   |                 | TC228242 0.0    |
| EBro01_SQ003_J07_at   |                      |                                 |                   | CD918668 4e-45  | BI779462 0.0    |
| EBro01_SQ004_B20_at   | Bradi5g22920.1 2e-24 | Os04g0631600 AK069366 5e-15     | AT3G20640.1 7e-07 | TC444990 7e-91  | TC233941 0.0    |
| EBro01_SQ004_H14_at   | Bradi1g29940.1 7e-06 | Os03g0377400 AK107223 2e-08     |                   |                 | BI779641 0.0    |
| EBro01_SQ004_K12_at   |                      |                                 |                   | BF203043 1e-17  | BI779645 2e-177 |
| EBro01_SQ004_K17_at   |                      |                                 |                   | BJ285384 3e-18  | TC207094 3e-120 |
| EBro01_SQ004_K17_s_at |                      |                                 |                   |                 | BI779662 9e-114 |
| EBro01_SQ004_L11_at   |                      |                                 |                   | TC439410 9e-36  | BM097304 0.0    |
| EBro01_SQ004_M15_at   |                      | Os05g0324700 AK063581 5e-14     |                   | CV759488 1e-95  | BM097346 0.0    |
| EBro01_SQ004_N24_at   |                      | Os02g0556600 AK066206 3e-06     | AT2G22010.1 1e-07 |                 |                 |























|                                                                                                                                                                                                                                                                                                                                                                                                                                                                                                                                                                                                                                                                                                                                                                                                                                                                                                                                                                                                                                                                                                                                                                                                                                                                                                                                                                                                                                                                                                                                                                                                                                                                                                                                                                                                                                                               |                                                                                                                                                                                                                                                                                                                                                                                                                                                                                                                                                                                                                                                                                                                                                                                                                                                                                                                                                                                                                                                                                                                          |                                                                                                                                                                                                                                                                                                                                                                                                                                                                                                                                                                                                                                                                                                                                                                                                                                                                                                                                                                                                                                                                                                                                                                                                                                                                                                                                                                                                                                                         |                                                                                                                                                                                                                                                                                                                                                                                                                                                                                                                                                                                                                                                                                                                                             |                                                                                                                                                                                                                                                                                                                                                                                                                                                                                                                                                                                                                                                                                                                                                                                                                                                                                                                                                                                                                                                                                                                                                                                                                                                                                                                                                                     |                                                                                                                                                                                                                                                                                                                                                                                                                                                                                                                                                                                                                                                                                                                                                                                                                                                                                                                                                                                                                                                                                                                                                                                                                                                                                                                                                                                                                                                                                                                                                                                                                                                                                                                                                                                                                                                                                                                                                                                                                                                                                    |
|---------------------------------------------------------------------------------------------------------------------------------------------------------------------------------------------------------------------------------------------------------------------------------------------------------------------------------------------------------------------------------------------------------------------------------------------------------------------------------------------------------------------------------------------------------------------------------------------------------------------------------------------------------------------------------------------------------------------------------------------------------------------------------------------------------------------------------------------------------------------------------------------------------------------------------------------------------------------------------------------------------------------------------------------------------------------------------------------------------------------------------------------------------------------------------------------------------------------------------------------------------------------------------------------------------------------------------------------------------------------------------------------------------------------------------------------------------------------------------------------------------------------------------------------------------------------------------------------------------------------------------------------------------------------------------------------------------------------------------------------------------------------------------------------------------------------------------------------------------------|--------------------------------------------------------------------------------------------------------------------------------------------------------------------------------------------------------------------------------------------------------------------------------------------------------------------------------------------------------------------------------------------------------------------------------------------------------------------------------------------------------------------------------------------------------------------------------------------------------------------------------------------------------------------------------------------------------------------------------------------------------------------------------------------------------------------------------------------------------------------------------------------------------------------------------------------------------------------------------------------------------------------------------------------------------------------------------------------------------------------------|---------------------------------------------------------------------------------------------------------------------------------------------------------------------------------------------------------------------------------------------------------------------------------------------------------------------------------------------------------------------------------------------------------------------------------------------------------------------------------------------------------------------------------------------------------------------------------------------------------------------------------------------------------------------------------------------------------------------------------------------------------------------------------------------------------------------------------------------------------------------------------------------------------------------------------------------------------------------------------------------------------------------------------------------------------------------------------------------------------------------------------------------------------------------------------------------------------------------------------------------------------------------------------------------------------------------------------------------------------------------------------------------------------------------------------------------------------|---------------------------------------------------------------------------------------------------------------------------------------------------------------------------------------------------------------------------------------------------------------------------------------------------------------------------------------------------------------------------------------------------------------------------------------------------------------------------------------------------------------------------------------------------------------------------------------------------------------------------------------------------------------------------------------------------------------------------------------------|---------------------------------------------------------------------------------------------------------------------------------------------------------------------------------------------------------------------------------------------------------------------------------------------------------------------------------------------------------------------------------------------------------------------------------------------------------------------------------------------------------------------------------------------------------------------------------------------------------------------------------------------------------------------------------------------------------------------------------------------------------------------------------------------------------------------------------------------------------------------------------------------------------------------------------------------------------------------------------------------------------------------------------------------------------------------------------------------------------------------------------------------------------------------------------------------------------------------------------------------------------------------------------------------------------------------------------------------------------------------|------------------------------------------------------------------------------------------------------------------------------------------------------------------------------------------------------------------------------------------------------------------------------------------------------------------------------------------------------------------------------------------------------------------------------------------------------------------------------------------------------------------------------------------------------------------------------------------------------------------------------------------------------------------------------------------------------------------------------------------------------------------------------------------------------------------------------------------------------------------------------------------------------------------------------------------------------------------------------------------------------------------------------------------------------------------------------------------------------------------------------------------------------------------------------------------------------------------------------------------------------------------------------------------------------------------------------------------------------------------------------------------------------------------------------------------------------------------------------------------------------------------------------------------------------------------------------------------------------------------------------------------------------------------------------------------------------------------------------------------------------------------------------------------------------------------------------------------------------------------------------------------------------------------------------------------------------------------------------------------------------------------------------------------------------------------------------------|
| HM10J16r_at<br>HM10K10r_at<br>HM10M06r_at<br>HM10P03r_at<br>HM10P11r_at<br>HM10P11r_s_at<br>HM10P15r_at<br>HM10P17r_at<br>HM10P19r_at<br>HM11A01r_s_at<br>HM11C20r_at<br>HM11D03r_s_at<br>HM11F16r_at<br>HM11I04r_at<br>HM11K07r_at<br>HM11K19r_at<br>HM11L09r_at<br>HM11M18r_at<br>HM11O08r_at<br>HM11O08r_s_at<br>HM11O11r_at<br>HM11O16r_at<br>HM11P04r_at<br>HM12H05r_at<br>HM12H18r_at<br>HM12J12r_at<br>HM12K06r_at<br>HM12O22r_s_at<br>HM13E09r_x_at<br>HM13G02r_at<br>HM13J15r_at<br>HM13L06r_at<br>HM13N19r_at<br>HM13O14r_at<br>HM13O19r_at<br>HM13O19r_s_at<br>HM14B07r_at<br>HM14E10r_at<br>HM14G03r_at<br>HM14G18r_at<br>HM14H06r_at<br>HM14H20r_at<br>HM14M18r_at<br>HM14M23r_x_at<br>HM14O03r_at<br>HO01A07r_at<br>HO01F15S_at<br>HO01F23S_at<br>HO01H04r_at<br>HO01J13S_at<br>HO02B19S_at<br>HO02C20S_at<br>HO02E06S_at<br>HO02E11S_s_at<br>HO02O02S_at<br>HO02O08S_at<br>HO03I02S_at<br>HO03K04S_at<br>HO03L07S_at<br>HO04B16S_at<br>HO04D06S_at<br>HO04F17S_at<br>HO04H12S_s_at<br>HO04H20S_at<br>HO04I06S_at<br>HO04L23S_at<br>HO05G15S_at<br>HO05M15S_at<br>HO05O09S_at<br>HO06A21S_at<br>HO06E11S_at<br>HO06H02S_at<br>HO06I09S_at<br>HO06M17S_at<br>HO06P19S_at<br>HO07I11S_at<br>HO07I16S_at<br>HO07N21S_at<br>HO08B11S_at<br>HO08C10S_at<br>HO08J02S_at<br>HO08P01S_at<br>HO09C11S_at<br>HO09D01S_at<br>HO09D16S_at<br>HO09J15S_at<br>HO09M19S_s_at<br>HO10J02S_at<br>HO10M16S_at<br>HO10O22S_at<br>HO10P07S_at<br>HO11E24S_s_at<br>HO11K23S_s_at<br>HO11L24S_at<br>HO12E05S_at<br>HO12E21S_x_at<br>HO12F07S_at<br>HO12F08S_at<br>HO12F15S_s_at<br>HO13A14S_at<br>HO13D02S_at<br>HO13D14S_at<br>HO13G22S_at<br>HO13H03S_at<br>HO13I12S_at<br>HO13N17S_at<br>HO13O09S_s_at<br>HO14A23S_at<br>HO14C15S_at<br>HO14E07S_at<br>HO14E13S_at<br>HO14E18S_at<br>HO14H22S_s_at<br>HO14I22S_s_at<br>HO14K20S_at<br>HO14P06S_at<br>HO15C14S_s_at | Bradi1g20350.1 4e-35<br><br>Bradi1g18010.1 3e-18<br><br>Bradi3g03870.4 8e-16<br>Bradi4g16720.1 2e-21<br>Bradi1g17810.1 2e-13<br>Bradi2g51300.1 5e-08<br>Bradi3g05760.1 3e-20<br><br>Bradi1g63660.1 1e-25<br><br>Bradi4g31420.1 4e-07<br><br>Bradi1g52110.1 3e-08<br><br>Bradi2g47590.1 1e-52<br><br>Bradi1g14110.1 5e-19<br><br>Bradi3g35270.1 2e-11<br>Bradi1g00730.1 3e-20<br><br>Bradi2g37020.1 8e-79<br><br>Bradi2g46340.1 3e-20<br><br>Bradi1g49060.1 2e-19<br>Bradi3g41310.1 3e-25<br>Bradi4g07590.1 5e-10<br><br>Bradi1g09920.1 1e-07<br>Bradi3g28190.1 7e-16<br>Bradi3g34700.2 4e-09<br>Bradi5g10600.1 8e-18<br>Bradi3g51400.1 1e-40<br><br>Bradi3g51110.1 2e-23<br><br>Bradi3g37150.1 3e-06<br>Bradi1g44020.1 1e-08<br><br>Bradi2g47830.1 2e-07<br><br>Bradi5g13960.1 3e-16<br><br>Bradi1g77270.1 4e-13<br><br>Bradi3g48850.1 1e-24<br><br>Bradi3g08460.1 4e-24<br>Bradi2g32570.1 1e-13<br><br>Bradi2g03640.1 9e-26<br>Bradi1g58120.1 3e-12<br><br>Bradi2g40380.1 4e-11<br>Bradi2g40380.1 3e-30<br><br>Bradi1g64300.1 5e-59<br><br>Bradi3g34890.1 7e-32<br><br>Bradi1g11690.1 2e-26<br><br>Bradi5g02870.1 4e-06 | Os07g0633400 AK071894 1e-35<br><br>Os07g0674200 AK058245 1e-16<br><br>Os02g0149800 AK066016 2e-15<br>Os12g0244400 AK070297 4e-21<br>Os07g0678300 AK111746 2e-13<br><br>Os02g0177800 AK101699 1e-17<br><br>Os03g0326200 AK108821 4e-21<br><br>AK108864 AK108864 3e-10<br><br>Os06g0105900 AK072638 5e-08<br><br>Os05g0370900 J075091A11 7e-06<br><br>Os01g0702700 AK111782 8e-51<br><br>Os12g0604200 J065098L17 4e-14<br><br>Os08g0401900 Os08g0401900 1e-12<br>Os12g0277500 AK120503 1e-15<br><br>AK110017 AK110017 1e-06<br>Os05g0135500 AK060998 3e-44<br><br>Os01g0674100 AK102209 5e-20<br><br>Os06g0155500 Os06g0155500 2e-18<br>Os08g0532300 AK119730 1e-25<br>Os12g0472500 AK108523 3e-06<br><br>Os05g0101600 AK101021 3e-06<br>Os10g0464900 Os10g0464900 2e-16<br><br>Os04g0436100 AK072631 8e-17<br>Os02g0665500 AK109040 2e-34<br><br>Os11g0565920 Os11g0565920 1e-18<br><br>AK109063 AK109063 3e-06<br>Os06g0262200 Os06g0262200 7e-09<br><br>Os01g0708100 AK101457 2e-07<br><br>Os04g0487200 AK102330 1e-15<br><br>Os07g0575000 Os07g0575000 4e-12<br>Os03g0119000 AK071417 3e-12<br><br>Os02g0225900 Os02g0225900 2e-22<br>Os05g0209100 AK069043 1e-13<br><br>Os01g0101900 Os01g0101900 2e-23<br>Os06g0241100 AK068992 3e-07<br><br>Os09g0491900 AK106612 2e-08<br>Os10g0317000 AK120936 6e-27<br><br>Os03g0310600 AK109731 6e-58<br><br>Os08g0384500 AK100858 3e-30<br><br>Os03g0699600 AK070428 3e-22<br><br>Os04g0194500 AK121164 1e-05 | AT3G13600.1 2e-16<br><br>AT5G27770.1 5e-14<br><br>AT5G24940.1 3e-13<br>AT1G24400.1 2e-20<br><br>AT4G25800.1 1e-13<br><br>AT5G04930.1 9e-21<br><br>AT2G04620.1 5e-10<br><br>AT2G29210.1 6e-06<br><br>AT5G43870.1 1e-12<br><br>AT2G28671.1 3e-06<br>AT2G28000.1 3e-16<br><br>AT1G12830.1 9e-07<br>AT5G66390.1 2e-34<br><br>AT3G58640.1 6e-17<br><br>AT1G28680.1 2e-08<br>AT1G27310.1 2e-26<br><br>AT5G60710.1 7e-10<br><br>AT1G04290.1 1e-10<br>AT2G45910.1 5e-27<br><br>AT3G28450.1 4e-06<br><br>AT5G51880.1 5e-08<br><br>ATMG00830.1 5e-10<br><br>AT4G04480.1 6e-06<br>AT1G30000.1 1e-13<br><br>AT5G63500.1 3e-15<br><br>ATMG00860.1 1e-15<br><br>AT3G50190.1 7e-10<br><br>AT1G15520.1 9e-21<br><br>AT1G55000.2 1e-13<br><br>TC411573 1e-65 | TC397712 3e-176<br>TC402816 1e-16<br>TC434562 1e-20<br>CA606393 2e-72<br>TC439936 1e-40<br>TC439936 5e-55<br>TC418561 2e-22<br>TC386337 4e-68<br>TC403949 1e-76<br>CD939211 3e-108<br>TC404350 6e-78<br>TC390588 2e-62<br><br>TC439954 1e-33<br>TC400317 8e-18<br><br><br>CJ538420 9e-108<br>CJ538420 3e-111<br><br>BJ252036 5e-16<br><br>TC374502 0.0<br><br>TC429842 2e-103<br>CA693787 9e-26<br><br>TC437674 2e-23<br>TC436137 1e-25<br><br>CK153365 3e-59<br>TC396753 3e-23<br>TC396753 2e-23<br><br><br>TC428780 2e-29<br>TC409205 2e-75<br>TC425460 2e-58<br><br>TC397218 0.0<br>TC397548 0.0<br><br>CJ658260 4e-123<br>CA682660 1e-83<br>CA685545 1e-14<br>GH721127 4e-107<br><br>TC446010 2e-17<br>CK203800 8e-86<br>TC443344 2e-161<br><br>TC398211 2e-38<br>TC412044 3e-52<br>TC444501 7e-77<br>BU100387 1e-61<br>CJ959520 2e-35<br>TC397132 2e-85<br><br>CA684286 2e-61<br><br>TC443971 7e-45<br>TC388415 0.0<br>TC426788 6e-137<br><br>TC407747 3e-80<br><br><br>TC414261 8e-61<br>TC409444 5e-56<br><br>TC400312 1e-77<br>TC368603 3e-33<br>TC418301 9e-24<br>TC395589 6e-93<br>TC416203 3e-25<br>CK195584 3e-167<br>TC418909 3e-86<br><br>TC454448 7e-68<br><br>TC384514 4e-13<br><br>CA693473 6e-60<br>TC375661 9e-28<br><br><br>TC387575 6e-68<br>TC433189 3e-58<br>CJ805305 0.0<br><br>TC433458 8e-105<br><br>TC406157 2e-71<br><br>TC411573 1e-65 | TC214090 0.0<br>TC203990 2e-34<br>TC219960 9e-158<br>TC208976 2e-82<br>TC219743 2e-71<br>TC219743 1e-81<br>TC232774 1e-144<br>TC225047 1e-68<br>TC229032 4e-65<br>TC200578 0.0<br>TC236443 2e-168<br>TC214292 3e-90<br>TC211861 6e-140<br>TC208336 0.0<br>TC214059 6e-29<br>TC232648 1e-134<br>TC224986 0.0<br>TC210566 9e-23<br>TC204841 8e-174<br>TC204841 0.0<br>TC211937 0.0<br>TC223396 9e-136<br>TC222706 0.0<br>BU996101 0.0<br>TC208160 0.0<br>BU996142 7e-127<br>TC232972 0.0<br>TC213490 3e-85<br>TC232117 1e-33<br>TC220035 9e-18<br>BU996437 0.0<br>TC226410 2e-59<br>BU996516 0.0<br>TC207561 0.0<br>TC215539 7e-84<br>TC215539 7e-80<br>BU996580 0.0<br>BU996644 0.0<br><br>TC220107 5e-66<br>BU996695 5e-87<br>BU996708 0.0<br>BU996797 0.0<br>TC211649 3e-155<br>TC228626 8e-124<br>TC216231 0.0<br>TC213666 0.0<br>TC211308 0.0<br>TC221279 0.0<br>TC214235 0.0<br>TC218250 0.0<br>TC213686 0.0<br>TC209959 0.0<br>TC210665 0.0<br>TC234372 2e-99<br>CD054015 3e-170<br>TC220185 0.0<br>TC201413 0.0<br>TC200835 5e-68<br>TC228168 6e-143<br>CD053564 0.0<br>TC219041 0.0<br>CD663514 8e-70<br>TC229355 3e-164<br>TC234314 2e-118<br>TC214218 0.0<br>CD058279 0.0<br>CD058152 0.0<br>TC231324 6e-165<br>CD058047 0.0<br>TC225165 1e-156<br>CD057911 0.0<br>TC230188 2e-180<br>TC238090 2e-108<br>TC226524 3e-179<br>TC226368 0.0<br>TC196548 0.0<br>TC222794 0.0<br>TC209159 0.0<br>TC213698 0.0<br>TC221671 0.0<br>CD055332 0.0<br>TC226908 0.0<br>TC221171 6e-159<br>TC218064 0.0<br>CD055568 1e-119<br>TC205351 5e-109<br>TC215135 0.0<br>TC203291 0.0<br>TC200022 3e-142<br>TC234212 7e-127<br>TC216595 2e-139<br>TC220030 0.0<br>TC210792 0.0<br>TC229227 0.0<br>TC219181 1e-85<br>TC229858 3e-157<br>TC220009 0.0<br>TC211104 5e-109<br>TC224510 8e-174<br>TC220376 0.0<br>TC228539 0.0<br>TC222228 0.0<br>TC218709 0.0<br>CD056876 0.0<br>TC195606 0.0<br>TC200886 4e-113<br>TC221164 0.0<br>TC231671 0.0<br>TC215647 4e-59<br>TC225494 6e-33<br>TC226536 3e-170<br>TC201918 1e-178<br>TC219163 5e-71<br>TC214996 0.0<br>TC229913 3e-167<br>TC207780 4e-85 |
|---------------------------------------------------------------------------------------------------------------------------------------------------------------------------------------------------------------------------------------------------------------------------------------------------------------------------------------------------------------------------------------------------------------------------------------------------------------------------------------------------------------------------------------------------------------------------------------------------------------------------------------------------------------------------------------------------------------------------------------------------------------------------------------------------------------------------------------------------------------------------------------------------------------------------------------------------------------------------------------------------------------------------------------------------------------------------------------------------------------------------------------------------------------------------------------------------------------------------------------------------------------------------------------------------------------------------------------------------------------------------------------------------------------------------------------------------------------------------------------------------------------------------------------------------------------------------------------------------------------------------------------------------------------------------------------------------------------------------------------------------------------------------------------------------------------------------------------------------------------|--------------------------------------------------------------------------------------------------------------------------------------------------------------------------------------------------------------------------------------------------------------------------------------------------------------------------------------------------------------------------------------------------------------------------------------------------------------------------------------------------------------------------------------------------------------------------------------------------------------------------------------------------------------------------------------------------------------------------------------------------------------------------------------------------------------------------------------------------------------------------------------------------------------------------------------------------------------------------------------------------------------------------------------------------------------------------------------------------------------------------|---------------------------------------------------------------------------------------------------------------------------------------------------------------------------------------------------------------------------------------------------------------------------------------------------------------------------------------------------------------------------------------------------------------------------------------------------------------------------------------------------------------------------------------------------------------------------------------------------------------------------------------------------------------------------------------------------------------------------------------------------------------------------------------------------------------------------------------------------------------------------------------------------------------------------------------------------------------------------------------------------------------------------------------------------------------------------------------------------------------------------------------------------------------------------------------------------------------------------------------------------------------------------------------------------------------------------------------------------------------------------------------------------------------------------------------------------------|---------------------------------------------------------------------------------------------------------------------------------------------------------------------------------------------------------------------------------------------------------------------------------------------------------------------------------------------------------------------------------------------------------------------------------------------------------------------------------------------------------------------------------------------------------------------------------------------------------------------------------------------------------------------------------------------------------------------------------------------|---------------------------------------------------------------------------------------------------------------------------------------------------------------------------------------------------------------------------------------------------------------------------------------------------------------------------------------------------------------------------------------------------------------------------------------------------------------------------------------------------------------------------------------------------------------------------------------------------------------------------------------------------------------------------------------------------------------------------------------------------------------------------------------------------------------------------------------------------------------------------------------------------------------------------------------------------------------------------------------------------------------------------------------------------------------------------------------------------------------------------------------------------------------------------------------------------------------------------------------------------------------------------------------------------------------------------------------------------------------------|------------------------------------------------------------------------------------------------------------------------------------------------------------------------------------------------------------------------------------------------------------------------------------------------------------------------------------------------------------------------------------------------------------------------------------------------------------------------------------------------------------------------------------------------------------------------------------------------------------------------------------------------------------------------------------------------------------------------------------------------------------------------------------------------------------------------------------------------------------------------------------------------------------------------------------------------------------------------------------------------------------------------------------------------------------------------------------------------------------------------------------------------------------------------------------------------------------------------------------------------------------------------------------------------------------------------------------------------------------------------------------------------------------------------------------------------------------------------------------------------------------------------------------------------------------------------------------------------------------------------------------------------------------------------------------------------------------------------------------------------------------------------------------------------------------------------------------------------------------------------------------------------------------------------------------------------------------------------------------------------------------------------------------------------------------------------------------|

















































































|                 |                      |                                 |                   |                 |                 |
|-----------------|----------------------|---------------------------------|-------------------|-----------------|-----------------|
| S78730_at       | Bradi4g30060.2 7e-56 | Os08g0435900 AK060222 1e-52     | AT3G47470.1 8e-49 | TC372628 0.0    | NP315930 0.0    |
| U08169_at       | Bradi1g64360.1 7e-31 | Os03g0309200 AK071993 2e-29     | AT4G16250.1 4e-24 | TC368697 2e-104 | TC195109 7e-105 |
| U09476.1_at     |                      |                                 | AT2G21550.1 9e-07 |                 |                 |
| U19359_s_at     |                      |                                 |                   | CA701486 1e-46  | TC215315 9e-89  |
| U29604.1_at     |                      |                                 |                   |                 |                 |
| U34198_at       | Bradi3g01270.1 4e-52 | Os02g0112100 AB008519 7e-44     | AT1G08090.1 9e-32 | TC388694 9e-143 | NP315795 0.0    |
| U43494_at       | Bradi1g12730.1 1e-28 | Os11g0529133 Os11g0529133 2e-21 | AT5G13930.1 8e-16 |                 | NP316061 0.0    |
| U93501_CDS-1_at |                      |                                 |                   | TC368648 7e-11  | TC211312 0.0    |
| V00087.1_at     |                      |                                 |                   |                 |                 |
| X01778_x_at     | Bradi3g17070.1 3e-16 | Os06g0507200 AK107785 7e-08     |                   | NP9349516 4e-46 | TC216861 0.0    |
| X12735_at       | Bradi2g16290.1 6e-86 | Os01g0720500 AK062725 4e-85     | AT2G34430.1 1e-79 | TC372826 2e-140 | NP316431 0.0    |
| X15691_x_at     | Bradi1g55600.1 6e-56 | Os07g0178800 AF017356 8e-49     | AT3G22840.1 2e-37 | TC380735 0.0    | NP315989 0.0    |
| X17220.1_at     |                      | Os07g0591100 J075155A07 2e-08   |                   |                 |                 |
| X59248_at       |                      |                                 |                   |                 | NP315934 0.0    |
| X62655.1_s_at   |                      |                                 |                   |                 |                 |
| X65526.1_at     |                      |                                 |                   |                 |                 |
| X65605_at       | Bradi1g65630.1 3e-22 | Os08g0484600 AK072723 5e-22     | AT3G01090.2 2e-14 | TC425896 1e-72  | NP316433 7e-121 |
| X65605_x_at     | Bradi1g65630.1 7e-26 | Os08g0484600 AK072723 2e-25     | AT3G01090.2 2e-18 | TC425896 3e-88  | NP316433 1e-138 |
| X68656_s_at     | Bradi4g44400.1 2e-15 | AK061740 AK061740 4e-14         | AT5G59320.1 2e-11 | CK162085 4e-72  | NP316013 1e-125 |
| X70876_at       |                      |                                 |                   | BE470930 3e-24  | TC212240 4e-147 |
| X74365_at       |                      | AK063146 AK063146 1e-18         | AT2G07671.1 1e-30 | TC391063 2e-126 | NP315929 7e-127 |
| X84055_at       |                      |                                 |                   | TC382379 6e-14  | NP316010 0.0    |
| X87690_s_at     | Bradi2g53010.1 4e-48 | Os01g0812000 AK119607 2e-43     |                   | TC397410 1e-175 | TC195133 0.0    |
| X89023_x_at     | Bradi3g42620.1 2e-34 | Os01g0720500 AK062725 1e-33     | AT2G34430.1 2e-33 | TC420405 3e-64  | TC195988 9e-102 |
| X92754_at       | Bradi3g06480.1 7e-50 | Os02g0187800 AK071794 2e-49     | AT4G34230.1 2e-55 |                 | NP315889 0.0    |
| X93170_at       |                      |                                 |                   |                 | TC195702 8e-21  |
| X97313_at       | Bradi3g49250.1 1e-22 | Os04g0518200 AK100346 1e-22     | AT5G04230.1 4e-20 | TC389940 7e-36  | NP315933 8e-89  |
| X98747_at       | Bradi1g54180.1 5e-33 | Os07g0209800 AB118012 1e-33     | AT1G32150.1 5e-19 | TC404437 5e-168 | NP315872 0.0    |
| Y09233_at       | Bradi4g17230.1 7e-52 | Os11g0530600 AB000801 2e-53     | AT5G13930.1 1e-49 | TC435981 2e-88  | NP315745 0.0    |
| Y09748_at       | Bradi2g06750.1 3e-27 | Os01g0210700 AK065938 1e-24     | AT4G18290.1 2e-20 |                 | TC234855 2e-92  |
| Y10834_at       | Bradi1g55450.1 3e-13 |                                 |                   | BQ236649 5e-70  | NP315739 0.0    |
| Z48624_x_at     | Bradi4g00940.1 4e-34 | AK073614 AK073614 6e-34         | AT5G61030.1 1e-29 | TC424936 1e-88  | TC204769 1e-179 |
